# Supplementary material
Source: PubMed Central journal article supplement (PMC7228315)
Supplement: JSAP-61-E1-s001.pdf [file JSAP-61-E1-s001.pdf]

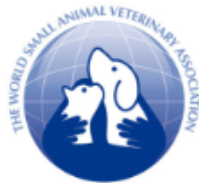WSAVA  
Global Veterinary CommunityVaccination  
Guidelines  
Group  


## Recomendações sobre a vacinação para médicos veterinários de pequenos animais da América Latina: um relatório do Grupo de Diretrizes de Vacinação da WSAVA

### AUTORES:

M. J. Day\*, C. Crawford†, M. Marcondes‡ e R. A. Squires§

\*Escola de Veterinária e Ciências Biológicas, Universidade de Murdoch, Murdoch, WA 6150, Austrália

†Escola de Medicina Veterinária da Flórida, Gainesville, FL, EUA

‡Faculdade de Medicina Veterinária, Universidade Estadual Paulista, Araçatuba, SP, Brasil

§Disciplina de Ciência Veterinária, Universidade James Cook, Townsville, QLD, Austrália

### Resumo Executivo

O Grupo de Diretrizes de Vacinação (VGG) da Associação Mundial de Veterinários de Pequenos Animais (WSAVA) tem publicado diretrizes globais de vacinação canina e felina para médicos veterinários. Reconhecendo que existem aspectos únicos da prática veterinária em certas regiões geográficas do mundo, o Grupo de Diretrizes de Vacinação realizou um projeto regional na América Latina, entre 2016 e 2019, que culminou no presente documento. O Grupo de Diretrizes de Vacinação reuniu dados científicos e demográficos durante visitas à Argentina, Brasil e México, através de discussões com líderes de opinião nacionais, visitas à clínicas veterinárias e revisão da literatura científica. Um questionário de pesquisa foi respondido por 1390 veterinários em cinco países da América Latina e o Grupo de Diretrizes de Vacinação forneceu educação contínua em sete eventos assistidos por mais de 3500 veterinários.

O Grupo de Diretrizes de Vacinação identificou numerosos desafios na América Latina, como por exemplo: (1) falta de supervisão nacional da profissão médico veterinária, (2) extraordinário crescimento de faculdades particulares de medicina veterinária, de qualidade as vezes duvidosa, (3) restrições socioeconômicas para o engajamento dos clientes com os cuidados de medicina preventiva, (4) alta prevalência regional de algumas doenças infecciosas importantes (p. ex., infecção pelo vírus da leucemia felina, leishmaniose visceral canina), (5) ausência quase completa de vacinas contendo uma quantidade mínima de antígenos, como as disponíveis em outros mercados, (6) ausência relativa de vacinas com duração estendida da imunidade, como as disponíveis em outros mercados, (7) disponibilidade de vacinas retiradas de outros mercados (p. ex., vacina para *Giardia*) ou exclusivas da América Latina (p. ex., algumas vacinas para *Leishmania*), (8) acesso a vacinas diretamente pelos donos de animais de estimação ou criadores, de forma que a vacinação pode ser realizada sem supervisão veterinária, (9) disponibilidade limitada de educação continuada em vacinologia veterinária e falta de obrigatoriedade de desenvolvimento e atualização profissional continuada e (10) limitados dados publicados em revistas científicas indexadas sobre doenças infecciosas em pequenos animais (com exceção da leishmaniose) e ausência de apoio para tal pesquisa acadêmica.

Neste documento, o Grupo de Diretrizes de Vacinação resume as conclusões deste projeto e avalia, baseado em evidências científicas, a literatura referente a doenças que podem ser evitadas com vacinação em animais de companhia na América Latina. O Grupo de Diretrizes de Vacinação faz algumas recomendações sobre o ensino de graduação e pós-graduação e a pesquisa acadêmica. Reconhecendo que a atual disponibilidade de produtos na América Latina não permite que os veterinários desses países vacinem de acordo com as diretrizes da Associação Mundial de Veterinários de Pequenos Animais, o Grupo de Diretrizes de Vacinação faz uma série de recomendações “pragmáticas” quanto ao que pode ser atualmente realizado e uma série de recomendações “ambiciosas” quanto ao que pode ser desejado para o futuro. O conceito de “manejo de vacinas” é abordado através de algumas diretrizes simples para a manutenção das vacinas nas clínicas. Finalmente, o Grupo de Diretrizes de Vacinação enfatiza a tendência global de que a vacinação seja parte de um programa de “check up” anual ou de um “plano de saúde” que revise holisticamente as necessidades de cuidados preventivos de saúde para cada animal, de forma individualizada. Os médicos veterinários da América Latina devem fazer a transição para essas importantes novas práticas que já estão bem incorporadas nos mercados veterinários mais desenvolvidos.

O documento também inclui 70 perguntas frequentes que foram apresentadas para o Grupo de Diretrizes de Vacinação durante nossos eventos de educação continuada, com as respectivas respostas, que abordam muitas das questões envolvendo a vacinação nos países da América Latina. Traduções para o espanhol e o português deste documento serão disponibilizadas gratuitamente no site da WSAVA, na página do Grupo de Diretrizes de Vacinação (VGG).

## INTRODUÇÃO

O Grupo de Diretrizes de Vacinação (VGG) da Associação Mundial de Veterinários de Pequenos Animais (WSAVA) foi estabelecido em 2004 com o escopo de fornecer diretrizes, baseadas em evidências científicas, que pudessem ser aplicadas globalmente para médicos veterinários de pequenos animais, sobre a melhor conduta para vacinação de cães e gatos. O VGG redigiu diretrizes de vacinação globais para veterinários pela primeira vez em 2007, e essas foram atualizadas em 2010 e 2016 (Day *et al.* 2016) e traduzidas para vários idiomas. O foco principal das diretrizes de vacinação da WSAVA é direcionado principalmente a cães e gatos que vivem predominantemente dentro ou nos arredores dos domicílios de seus donos (e não para os que vivem 100% do tempo livres ou em grandes grupos); mas também existem diretrizes sobre a vacinação em um ambiente de abrigo. As revisões de 2010 e 2016 foram acompanhadas de um documento separado fornecendo informações sobre a vacinação para os donos e criadores de cães e gatos, e por uma série de “folhetos informativos” sobre doenças infecciosas, designados para serem utilizados pelos veterinários durante a consulta com os clientes (<https://wsava.org/global-guidelines/vaccination-guidelines/>).

De 2012 a 2014, o VGG trabalhou em um projeto regional enfocando os requisitos de vacinação de pequenos animais na Ásia (Day *et al.* 2015). A partir do sucesso daquele projeto, o VGG embarcou em um segundo projeto regional na América Latina entre 2016 e 2019. O presente artigo representa o resultado final deste projeto para a América Latina. Ele resume os principais desafios enfrentados pelos médicos veterinários de pequenos animais na América Latina e faz uma série de recomendações para ações futuras que podem beneficiar a profissão, os donos de animais de estimação e os cães e gatos nesses países. O manuscrito será disponibilizado na tradução para o espanhol e português nas páginas da web do VGG (veja acima).

O VGG reconhece que a América Latina é uma região vasta e diversa, composta por numerosos países com condições geográficas, climáticas, culturais e socioeconômicas distintas; todas estas podendo ter impacto nos cuidados dos animais de estimação, na prevalência e distribuição das principais doenças infecciosas dos animais de estimação e na acessibilidade aos cuidados de saúde preventiva para essas populações de animais. O VGG não pode visitar cada país da região, mas, conforme descrito abaixo, reuniu dados extensos nos quais são baseados nossos comentários e recomendações. Acreditamos que a maioria dessas recomendações terá aplicabilidade em toda a América Latina.

## METODOLOGIA

Os membros do VGG foram alterados para o projeto da América Latina. As Professoras Cynda Crawford e Mary Marcondes; esta última recrutada como uma especialista regional em doenças infecciosas e vacinologia de pequenos animais, se juntaram ao Professor Emérito Michael J. Day e ao Professor Richard A. Squires. O objetivo principal do projeto foi reunir o máximo possível de informações e de evidências científicas referentes à clínica de pequenos animais, doenças infecciosas que podem ser prevenidas por vacinas e sobre vacinação de cães e gatos, para servir de base sólida para as recomendações a serem feitas subsequentemente. Para isso, o VGG realizou visitas para levantamento de informações na Argentina (Buenos Aires e Rosário, em 2016), Brasil (São Paulo e Rio de Janeiro, em 2017) e México (Cidade do México, Guadalajara e Monterrey, em 2018). Cada uma dessas visitas foi estruturada da mesma forma e envolveu discussões formais em pequenos grupos com os principais líderes de opinião incluindo (1) clínicos veterinários particulares, (2) representantes de associações veterinárias de pequenos animais, (3) docentes de medicina veterinária envolvidos em pesquisa de doenças infecciosas em pequenos animais e no ensino de microbiologia, imunologia, clínica médica e vacinologia, (4) funcionários do governo responsáveis pela avaliação e licenciamento de vacinas para pequenos animais e (5) representantes de fabricantes e distribuidores nacionais e internacionais de vacinas. As reuniões formais foram complementadas com visitas a clínicas veterinárias em cada uma das sete cidades, selecionadas de forma a que se visitasse clínicas de diferentes tamanhos e padrões. A literatura científica relevante para a missão do VGG foi coletada através de pesquisa em bancos de dados *online* e diretamente através dos professores universitários participantes das reuniões com os principais líderes de opinião. Durante 2019, o VGG se reuniu para discutir as informações e redigir este relatório final.

Para ampliar as informações obtidas através dessas reuniões presenciais, o VGG desenvolveu um questionário que foi encaminhado para clínicos particulares de vários países (Apêndice). O questionário foi projetado usando o “Google forms” (<https://www.google.com/intl/en-GB/forms/about/>) e foi acessado e respondido *online*. O questionário foi disponibilizado em português e espanhol e foi respondido anonimamente com a instrução de que somente um veterinário de cada clínica respondesse à pesquisa. As respostas foram analisadas (usando as ferramentas do programa de pesquisa do Google) e resumidas. Através da pesquisa, o VGG reuniu informações sobre (1) os dados demográficos dos veterinários que responderam ao questionário, (2) clínicas veterinárias e seu acesso a laboratórios de diagnóstico, (3) doenças infecciosas caninas e felinas observadas nas clínicas e (4) vacinas caninas e felinas e protocolos de vacinação usados nas clínicas. As respostas às pesquisas foram recebidas de 175 médicos veterinários da Argentina, 579 do Brasil e 552 do México. Um pequeno número de respostas foi recebido de veterinários do Equador (n = 51) e Costa Rica (n = 33). A pesquisa foi disponibilizada a outras associações membros da WSAVA na América Latina (Colômbia, Cuba, El Salvador, Guatemala, Peru, Uruguai e Venezuela), mas não houve resposta dessas associações.

Um dos objetivos do projeto era fornecer educação contínua (EC) em vacinologia de pequenos animais aos veterinários da América Latina. Portanto, em cada uma das sete cidades visitadas, os membros do VGG realizaram EC com meio dia de duração, consistindo em uma série de palestras acompanhadas de anotações por escrito (e traduzidas). Em cada evento eram apresentados os resultados do questionário de pesquisa nacional. No decorrer do projeto, estes eventos colocaram o VGG em contato direto com mais de 3500 médicos veterinários da América Latina, com participação de 150 na Argentina, 1200 no Brasil e mais de 2000 no México. Esse grande número foi obtido com transmissão ao vivo de um dos eventos no Brasil através do Facebook, e por filmagem profissional e distribuição *online* (por um período de 30 dias) no México. Durante as sessões de discussão ativa que faziam parte de cada reunião, inúmeras “perguntas frequentes” emergiram e estas (com respostas) encontram-se apresentadas no fim deste documento.

### **Diretrizes de vacinação baseadas em evidência**

As diretrizes globais de vacinação de 2016 da WSAVA foram formuladas usando os princípios da medicina veterinária baseada em evidência. As recomendações, sempre que possível, foram dadas com base em evidência científica. O VGG reconheceu que a qualidade de tal evidência é variável e desenvolveu um novo esquema de classificação para categorizar a qualidade da evidência relacionada à vacinologia. Nós aplicamos o mesmo esquema às afirmações e recomendações realizadas neste documento. A classificação do VGG é a seguinte:

Categoria 1: uma recomendação respaldada por publicação científica em revista avaliada por pares, contendo dados experimentais ou de campo. A evidência dentro desta categoria pode ainda ser de qualidade científica variável apesar da revisão por pares, pois o processo de revisão por pares não obedece a um padrão universal.

Categoria 2: uma recomendação respaldada por estudos comercialmente confidenciais não publicados, submetidos como parte de um pacote regulatório para o licenciamento de vacinas veterinárias. O pressuposto para este nível de evidência é de que as informações que aparecem nas bulas dos produtos foram submetidas à revisão por pares, pelas autoridades reguladoras competentes.

Categoria 3: uma recomendação respaldada por dados experimentais ou do campo, comerciais ou independentes, que não foram publicados na literatura científica revisada por pares ou não foram incluídos em um pacote regulatório formal e submetidos à avaliação de autoridades reguladoras.

Categoria 4: uma recomendação não respaldada por dados experimentais ou do campo, mas assumida pelo conhecimento dos “princípios básicos” da microbiologia e imunologia, ou respaldada por opinião de especialistas amplamente reconhecidos.

Ao longo deste documento, as afirmações serão acompanhadas por um qualificador [EC1], [EC2], [EC3] ou [EC4] refletindo uma “base de evidência” das categorias 1, 2, 3 ou 4, respectivamente. Para cada ocasião em que foram citadas, foi utilizado somente o nível de evidência mais rigoroso disponível.

## **SITUAÇÃO ATUAL NA AMÉRICA LATINA**

### **A crescente tendência de possuir animais de estimação na América Latina**

Existe pouca dúvida de que a América Latina esteja experimentando um notável crescimento na posse de animais de estimação, associado ao crescimento da indústria de cuidados com os animais de estimação. Uma pesquisa realizada em 2016 pela GfK Global com 27.000 consumidores em 22 diferentes países revelou que a América Latina tem o nível global mais elevado no que diz respeito à posse de animais de estimação. Oitenta por cento da população pesquisada por via *online* na Argentina e no México e 75% da população pesquisada no Brasil, possuíam um animal de estimação. Entre os donos de animais de estimação, 66% na Argentina, 64% no México e 58% no Brasil possuíam cães e 32, 24 e 28%, respectivamente, possuíam gatos:

[https://www.gfk.com/fileadmin/user\\_upload/country\\_one\\_pager/NL/documents/Global-GfK-survey\\_Pet-Ownership\\_2016.pdf](https://www.gfk.com/fileadmin/user_upload/country_one_pager/NL/documents/Global-GfK-survey_Pet-Ownership_2016.pdf).

Não existem números nacionais exatos para as populações de cães e gatos. Em 2014, a estimativa era que havia 52,2 milhões de cães e 22,1 milhões de gatos no Brasil (Conceição 2016) e os principais líderes de opinião da Argentina estimaram haver até 10 milhões de cães e 3 milhões de gatos no país. Em algumas regiões, muitos destes animais vivem nas ruas e não possuem donos ou lares. Com tal crescimento deve ocorrer uma demanda crescente por serviços veterinários e cuidados de saúde preventivos para animais de estimação, incluindo o fornecimento de proteção contra doenças infecciosas para o animal de forma individual e para a população de animais (“imunidade de rebanho”) através de vacinação.

### **A profissão veterinária e a educação veterinária na América Latina**

O VGG discutiu dados demográficos com colegas vinculados a universidades e a associações de classe na Argentina, Brasil e México. Nós nos reunimos com gestores e professores/pesquisadores universitários de várias faculdades de veterinária de cada país. Uma observação geral foi a de que pareceu desafiador fornecer dados acurados e atualizados sobre a demografia da profissão, pelo fato de não existir autoridades reguladoras profissionais nacionais que possam assegurar a qualidade do ensino de medicina veterinária, que mantenham registros dos veterinários em exercício especificamente na área de pequenos animais, e que assegurem que eles realizem desenvolvimento profissional continuado. Foram fornecidas algumas estimativas do número de veterinários na Argentina (21.000), Brasil (130.000 veterinários ativos) e México (45.000).

O número de faculdades de medicina veterinárias foi estimado em 21 na Argentina e 45 no México, incluindo universidades públicas e privadas. O crescimento mais extraordinário de faculdades de veterinárias foi observado no Brasil, onde ocorreu

um aumento marcante no número de instituições privadas que oferecem cursos de medicina veterinária, onde existem atualmente mais de 400 escolas no país (Conselho Federal de Medicina Veterinária, comunicação pessoal). Sessenta e três delas estão em universidades públicas financiadas pelo estado ou pelo governo federal, com o restante encontrando-se no setor privado. Não existem currículos nacionais centralizados e o conteúdo e o padrão do ensino parecem ser bastante variáveis. Observou-se grandes diferenças nos currículos no tocante ao ensino das doenças infecciosas, imunologia e vacinologia de animais de estimação. De forma similar verificamos que as abordagens para ensinar a aplicação clínica da vacinação em consultórios veterinários são inconsistentes.

A educação continuada não é obrigatória para os médicos veterinários e não há nenhuma ferramenta para registrar ou reconhecer a participação de veterinários em desenvolvimento profissional. As oportunidades de educação continuada são fornecidas através de congressos promovidos por entidades de classe, congressos comerciais privados e palestras (físicas e online) fornecidos pela indústria ou por órgãos privados. No Brasil, em particular, a indústria tem um programa ativo para fornecer educação continuada em vacinologia através de apoio a palestras sobre o assunto. Na América Latina muitas clínicas veterinárias são pequenas e administradas apenas por um veterinário. Isto cria um desafio para esses veterinários conseguirem deixar seu consultório para participar de eventos de educação continuada.

Muitos dos colegas professores com os quais o VGG se reuniu estavam envolvidos e publicando pesquisa científica sobre doenças infecciosas em animais de estimação. Esses estudos formam a literatura baseada em evidência da América Latina e, onde apropriado, encontram-se citados neste documento. Da mesma forma como acontece em outras partes do mundo, na América Latina existe um desafio para se obter recursos para o desenvolvimento de pesquisas científicas direcionadas a animais de estimação, mas devido à significância zoonótica da leishmaniose visceral canina, esta é uma doença particularmente bem investigada no Brasil. Nas clínicas veterinárias existem muitos problemas com o diagnóstico das doenças infecciosas em pequenos animais. A maioria das clínicas tem acesso a kits rápidos para o diagnóstico sorológico de doenças infecciosas, mas não a laboratórios de diagnóstico que ofereçam metodologias alternativas. Há geralmente uma falta de entendimento no que diz respeito às limitações dos testes utilizados e aos métodos mais apropriados para confirmar um diagnóstico de doença infecciosa.

### **Doenças infecciosas que podem ser prevenidas por vacinas em pequenos animais na América Latina**

A América Latina abrange uma vasta área (mais de 20 milhões de km<sup>2</sup>) englobando 20 países e uma população de mais de 650 milhões de habitantes. E, mais importante, quando se considera a frequência de doenças infecciosas, inclui-se partes da América do Norte, Sul e Central, assim como algumas ilhas do Caribe. Ela se estende por um vasto território de norte a sul, atravessando o equador e incluindo zonas climáticas temperadas, subtropicais e tropicais. A região possui ecossistemas que vão do deserto a altas montanhas e até a floresta tropical. Seria de se esperar, portanto, que a frequência das doenças infecciosas variasse acentuadamente de região para região dentro dessa vasta e diversificada região. Em algumas partes da América Latina a frequência dessas doenças infecciosas foi estudada detalhadamente (demonstrando, de fato, que variam amplamente) enquanto em várias outras áreas as doenças nunca foram estudadas.

O VGG obteve informações sobre a natureza e prevalência das doenças infecciosas caninas e felinas que podem ser prevenidas por vacinas na América Latina através de três métodos: (1) revisão da literatura científica revisada por pares, (2) discussão com os principais líderes de opinião em reuniões de pequenos grupos e (3) questionário encaminhado aos veterinários conforme descrito acima.

Os resultados do questionário demonstraram claramente que, nos cinco países pesquisados, as principais doenças infecciosas caninas que podem ser prevenidas por vacinação são observadas por médicos veterinários, particularmente as infecções causadas pelo vírus da cinomose canina (CDV) (observadas por 88 a 96% dos respondentes), pelo parvovírus canino tipo 2 (CPV2) (observadas por 88 a 94% dos respondentes) e por *Leptospira* spp. (reconhecidas por 49 a 68% dos respondentes) (Tabela 1). O complexo respiratório infeccioso canino (CRIC; “tosse dos canis”) é também amplamente observado (por 88 a 98% dos respondentes). Embora a raiva canina esteja controlada de modo variável nos países da América Latina (vide abaixo), os casos são ainda reconhecidos em todos os países (por 6 ao 12% dos respondentes). Não surpreendentemente, os casos de leishmaniose visceral canina (LVC) são mais frequentemente observados no Brasil (por 58% dos respondentes), mas parecem ocorrer também nos outros quatro países (observados por 3 a 11% dos respondentes). A exatidão dos dados das Tabelas 1 e 2 é incerta. Eles representam respostas dos veterinários que dizem identificar clinicamente estas doenças em suas clínicas, mas não exploram como essas doenças teriam sido diagnosticadas ou confirmadas, isto é, que tipo de diagnóstico foi firmado e se este é confiável.

Quanto às principais doenças infecciosas felinas que podem ser prevenidas por vacinas, os veterinários dos cinco países relataram claramente reconhecer as infecções causadas por parvovírus felino (FPV) (42 a 60% dos respondentes), herpesvírus felino tipo 1 (FHV1) (30 a 95% dos respondentes), calicivírus felino (FCV) (55 a 78% dos respondentes) e *Chlamydia felis* (18 a 50% dos respondentes). Parece haver amplo reconhecimento das doenças retrovirais felinas e mais adiante descrevemos a alta prevalência dessas infecções em certas regiões. Os respondentes da pesquisa reconheceram a infecção pelo vírus da leucemia felina (FeLV) (63 a 97% dos respondentes) e a infecção pelo vírus da imunodeficiência felina (FIV) (57 a 91% dos respondentes) em suas clínicas. Embora uma vacina contra a peritonite infecciosa felina (PIF) não esteja disponível na maior parte do mundo, incluindo a América Latina, também reunimos dados sobre a PIF, que foi reconhecida por 47 a 76% dos respondentes. Casos de raiva em gatos foram relatados por 2 a 9% dos veterinários. A mesma qualificação referente à robustez desses dados (vide acima) se aplica às informações sobre as doenças infecciosas felinas.

**Tabela 1. Visão geral dos principais agentes de doenças infecciosas caninas relatadas como estando presentes nas clínicas veterinárias em cinco países da América Latina**

| Doença/agente etiológico                  | Veterinários que relataram na Argentina (%) | Veterinários que relataram no Brasil (%) | Veterinários que relataram no México (%) | Veterinários que relataram no Equador (%) | Veterinários que relataram na Costa Rica (%) |
|-------------------------------------------|---------------------------------------------|------------------------------------------|------------------------------------------|-------------------------------------------|----------------------------------------------|
| CDV                                       | 89,1                                        | 91,7                                     | 94,4                                     | 96,1                                      | 87,9                                         |
| CAV                                       | 29,1                                        | 16,8                                     | 35,1                                     | 39,2                                      | 18,2                                         |
| CPV2                                      | 89,7                                        | 87,6                                     | 92,2                                     | 94,1                                      | 93,9                                         |
| Leptospirose                              | 62,3                                        | 68,3                                     | 63,3                                     | 49,0                                      | 51,5                                         |
| Complexo respiratório infeccioso canino   | 97,7                                        | 87,8                                     | 86,2                                     | 92,1                                      | 90,1                                         |
| Raiva                                     | 5,7                                         | 8,9                                      | 11,6                                     | 5,9                                       | 9,1                                          |
| Leishmaniose visceral canina              | 11,4                                        | 58,2                                     | 9,5                                      | 3,9                                       | 3,0                                          |
| <b>Número de respondentes da pesquisa</b> | <b>175</b>                                  | <b>579</b>                               | <b>552</b>                               | <b>51</b>                                 | <b>33</b>                                    |

CDV Vírus da cinomose canina, CAV Adenovirus canino 1 ou 2, CPV2 Variantes do parvovírus canino 2.

**Tabela 2. Visão geral dos principais agentes de doenças infecciosas felinas relatadas como estando presentes nas clínicas veterinárias em cinco países da América Latina**

| Doença/agente etiológico                  | Veterinários que relataram na Argentina (%) | Veterinários que relataram no Brasil (%) | Veterinários que relataram no México (%) | Veterinários que relataram no Equador (%) | Veterinários que relataram na Costa Rica (%) |
|-------------------------------------------|---------------------------------------------|------------------------------------------|------------------------------------------|-------------------------------------------|----------------------------------------------|
| FPV                                       | 44,4                                        | 42,0                                     | 60,5                                     | 58,9                                      | 48,5                                         |
| FHV1                                      | 78,1                                        | 94,9                                     | 44,1                                     | 41,2                                      | 30,3                                         |
| FCV                                       | 78,1                                        | 54,8                                     | 63,3                                     | 56,9                                      | 60,6                                         |
| <i>Chlamydia felis</i>                    | 42,0                                        | 49,5                                     | 25,2                                     | 17,6                                      | 21,2                                         |
| Vírus da leucemia felina                  | 63,3                                        | 82,1                                     | 84,6                                     | 88,2                                      | 96,9                                         |
| Vírus da imunodeficiência felina          | 72,2                                        | 82,3                                     | 57,6                                     | 80,4                                      | 90,9                                         |
| Peritonite infecciosa felina              | 62,1                                        | 67,6                                     | 56,7                                     | 47,1                                      | 75,6                                         |
| Raiva                                     | 4,7                                         | 7,8                                      | 7,3                                      | 1,9                                       | 9,1                                          |
| <b>Número de respondentes da pesquisa</b> | <b>175</b>                                  | <b>579</b>                               | <b>552</b>                               | <b>51</b>                                 | <b>33</b>                                    |

FPV Parvovírus felino, FHV1 Herpesvírus felino 1, FCV Calicivírus felino.

Fornecemos, nas seções abaixo, um resumo da literatura científica relevante publicada na América Latina sobre essas doenças infecciosas caninas e felinas. Estudos epidemiológicos de alta qualidade avaliando a distribuição das doenças infecciosas na América Latina são escassos e, embora existam alguns relatos, apenas alguns estudos publicados definiram as doenças com base na apresentação clínica com diagnóstico laboratorial confirmatório. Os testes confirmatórios nem sempre estão disponíveis em muitas partes da América Latina, especialmente nos locais onde não existe nenhum laboratório de diagnóstico veterinário e os veterinários utilizam laboratórios de diagnóstico humano. Além do mais, os testes diagnósticos, especialmente as análises moleculares (isto é, reação em cadeia da polimerase via transcriptase reversa; RT-PCR), são as vezes muito caros, fazendo com que o médico veterinário conte somente com o exame físico e muitas vezes apenas com o exame hematológico simples.

### Doenças infecciosas caninas na América Latina

Embora doenças como as causadas pela infecção pelo CDV e pelo CPV2 possam ser prevenidas por vacinação, em muitos países da América Latina elas são ainda um problema devido às taxas de vacinação (isto é, a imunidade de rebanho) serem muito baixas e haver um elevado número de cães de rua que nunca foram vacinados (Hartmann *et al.* 2007) [EC1]. Um outro problema é que em alguns países da América Latina não há exigência de que a vacinação seja realizada somente por veterinários. Portanto, a vacinação sem o exame clínico ou sem considerar a qualidade e a viabilidade do produto vacinal é uma prática comum. Também é possível um dono de animal de estimação comprar uma vacina de um comerciante agrícola, sem armazenamento e manuseio apropriados, e administrar em sua própria casa, sem exame clínico por um veterinário e sem transporte ou manutenção adequados do produto. O exame clínico regular por um veterinário, incluindo a vacinação adequada dos cães com as vacinas essenciais, é ainda um procedimento incomum entre os donos de cães em muitas partes da América Latina. Embora não existam estudos formais da prevalência na maioria dos países da América Latina, existem teses e resumos de estudos em repositórios de bibliotecas universitárias e algumas publicações demonstrando que as doenças infecciosas que podem ser prevenidas por vacinação ainda estão presentes na maioria dos países.

### Vírus da cinomose canina

Uma meta-análise de estudos transversais abordando a prevalência global do CDV mostrou que a maioria dos artigos da América Latina era proveniente do Brasil, Argentina e Chile (Costa *et al.* 2019) [EC1]. A prevalência da cinomose canina no Brasil variou de <10% a 41-50%, e na Argentina de 31-40% a >70% quando o diagnóstico foi baseado em estudos moleculares. Quando os estudos foram baseados em sorologia, a soroprevalência variou de 21-30% a 51-60% no Chile e de 10-20% a >70% no Brasil (Costa *et al.* 2019) [EC1]. No sul do Brasil, a soroprevalência do CDV foi relatada como sendo de 27,3% (223/817) em cães não vacinados (Dezengrini *et al.* 2007) [EC1]. Um estudo conduzido entre 2003 e 2004 na

Argentina verificou que 73,8% dos casos (73/99) foram confirmados por RT-PCR em cães com sinais clínicos da doença. Conforme relatado, a maioria dos cães daquele estudo tinha sido vacinada contra o CDV, mas provavelmente não tinha recebido uma série completa de vacinação (Calderon *et al.* 2007) [EC1]. Outros estudos confirmam que o CDV está presente no Brasil (Budaszewski *et al.* 2014, Monteiro *et al.* 2016, Alves *et al.* 2018), Chile (Acosta-Jamett *et al.* 2011, 2015), Colômbia (Espinal *et al.* 2014), Cuba (González-Chávez *et al.* 2017), Equador (DiGangi *et al.* 2019) incluindo as Ilhas Galápagos (Levy *et al.* 2008, Diaz *et al.* 2016) e México (Damián *et al.* 2005, Rodriguez-Tovar *et al.* 2007) [EC1].

### **Parvovírus canino**

A infecção pelo CPV2 ainda é observada frequentemente nos países da América Latina. No sul do Brasil a soroprevalência da exposição ao CPV2 foi relatada como sendo de 68,7% (561/817) em cães não vacinados (Dezengrini *et al.* 2007) [EC1]. Um estudo conduzido com 104 cães com diarreia no Brasil identificou o CPV2 por PCR em amostras fecais de 34,6% (36/104) dos cães (Gizzi *et al.* 2014) [EC1]. Outros estudos demonstram que o CPV2 está presente na Argentina (Calderón *et al.* 2011, 2015), Brasil (Alves *et al.* 2018, Headley *et al.* 2018), Chile (Acosta-Jamett *et al.* 2015), Colômbia (Duque-García *et al.* 2017), Cuba (Pino-Rodríguez *et al.* 2018), Equador (Levy *et al.* 2008, Aldaz *et al.* 2013, De la Torre *et al.* 2018, DiGangi *et al.* 2019), México (Ortega *et al.* 2017) e Uruguai (Pérez *et al.* 2007, Puentes *et al.* 2012, Maya *et al.* 2013) [EC1].

### **Adenovírus canino**

Embora muitos veterinários reportem que observam casos de hepatite infecciosa canina (causada pelo adenovírus canino tipo 1; CAV1) nos países da América Latina, os relatos de casos com confirmação do diagnóstico são raros. Em um relato de caso na Argentina o diagnóstico foi baseado na história, na avaliação macroscópica e microscópica e na presença de corpúsculos de inclusão hepáticos (Lértora e Burna 2003) [EC1]. No Brasil foram revisados relatórios de necropsia de 5361 cães durante um período de 43 anos (1964 a 2006) e 62 (1,2%) casos de hepatite infecciosa canina foram diagnosticados com base na história, na avaliação macroscópica e microscópica e na presença de corpúsculos de inclusão hepáticos (Inkelmann *et al.* 2007) [EC1]. Um estudo imuno-histoquímico de acompanhamento de 27 casos confirmou a presença de antígeno de CAV1 (Inkelmann *et al.* 2008) [EC1]. Um outro estudo conduzido no mesmo Estado, no sul do Brasil, avaliando casos de 1996 a 2009, relatou 23 diagnósticos de hepatite infecciosa canina, confirmados por imuno-histoquímica, de um total de 6993 exames necroscópicos dos cães, representando 0,34% dos cães avaliados (Oliveira *et al.* 2011) [EC1]. No Brasil, existem também alguns casos confirmados de infecção por CAV1 (Headley *et al.* 2013, 2018, 2019) [EC1].

### **Complexo respiratório infeccioso canino**

Um estudo conduzido em três abrigos no sul do Brasil demonstrou, por PCR de *swabs* nasais, que o CAV2 estava presente como única infecção em 5,4 e 7,8% dos cães em dois abrigos, enquanto o vírus da parainfluenza canina (CPiV; vírus da parainfluenza tipo 5) foi encontrado em 29,7 e 8,6% dos cães, respectivamente. O CAV2 esteve presente como coinfeção com CDV em 2,7% dos cães, CAV2 com CPiV em 22,9% dos cães, CPiV e CDV em 4% dos cães e CAV2, CDV e CPiV em 13,5% dos cães em um dos abrigos (Monteiro *et al.* 2016) [EC1].

Um estudo avaliando amostras pulmonares obtidas de cães que morreram de pneumonia aguda ou subaguda no México de 1996 a 2003, identificou, por imuno-histoquímica, CAV2 em 57,1% (20/35) e CPiV em 51,4% (18/35) dos cães (Damián *et al.* 2005) [EC1]. Nas ilhas Galápagos, onde são proibidas as vacinas felinas e caninas, foi relatada uma soroprevalência para CAV de 67,3% (64/95) e para CPiV de 100% (95/95) nos cães (Levy *et al.* 2008) [EC1].

Há pouca informação relacionada à prevalência de infecção por *Bordetella bronchiseptica* em cães nos países da América Latina. Cepas de *B. bronchiseptica* foram isoladas em 8,5% (11/130) dos esfregaços nasais obtidos de 130 cães no México (González *et al.* 2006) [EC1].

### **Leptospirose**

Embora existam muitos estudos demonstrando uma alta soroprevalência de leptospirose em cães nos países da América Latina, há poucas publicações onde o agente foi isolado para identificar o sorovar causador da doença. O teste de aglutinação microscópica (MAT) é o teste diagnóstico de escolha para a leptospirose canina; no entanto, ele possui pouca habilidade para confirmar o sorovar infectante. Estudos envolvendo o isolamento de leptospiros de cães são recomendados para fins epidemiológicos, assim como para a seleção de antígenos para o desenvolvimento de ensaios diagnósticos e de vacinas (Sykes *et al.* 2010) [EC1]. Durante as visitas do VGG aos países da América Latina, uma outra situação comumente relatada foi o diagnóstico da leptospirose baseado no teste de uma única amostra de sangue, às vezes considerando o sorovar com mais alto título como o causador da infecção. Embora, na presença de sinais clínicos, um único título >800 possa sugerir uma infecção, ele não pode confirmar o diagnóstico. O MAT deve ser realizado com amostras de soro pareadas, coletadas com 1 a 2 semanas de intervalo. Uma elevação de quatro vezes no título de anticorpos confirma uma infecção recente (Sykes *et al.* 2010) [EC1]. O sorogrupo com o título mais elevado muitas vezes é interpretado como o sorogrupo infectante; contudo, o título mais elevado no MAT pode variar ao longo do tempo, indicando que o MAT não prediz confiavelmente o sorogrupo infectante em animais com infecção aguda (Schuller *et al.* 2015) [EC1]. Outro problema nos países da América Latina é a falta de padronização e controle de qualidade nos laboratórios que realizam o MAT para o diagnóstico da leptospirose, resultando na variação dos resultados.

A leptospirose em cães é causada principalmente pelo *Leptospira interrogans* e *Leptospira kirschneri* (Sykes *et al.* 2010) [EC1]. No entanto, *Leptospira noguchii* (Silva *et al.* 2009) [EC1] e *Leptospira santarosai* (Miotto *et al.* 2016) [EC1] foram também isoladas de cães no Brasil. Os sorovares de *Leptospira interrogans* mais frequentemente isolados tanto de cães doentes como de cães aparentemente saudáveis no Brasil foram Canicola e Copenhageni (Yasuda *et al.* 1980, Rodrigues *et al.* 2007, Miraglia *et al.* 2013, Hagiwara *et al.* 2015) [EC1]. A *L. interrogans* sorovar Pomona foi isolada de inúmeros cães

em um estudo (Yasuda *et al.* 1980) [EC1]. *A. L. interrogans* sorovar Copenhageni também foi o sorovar predominante em isolados de casos suspeitos de leptospirose canina em Trinidad e Tobago (Suepaul *et al.* 2010).

### **Infecção pelo vírus da raiva canina**

Os casos de raiva humana e canina foram reduzidos em aproximadamente 90% ao longo dos últimos 20 anos nos países da América Latina após os programas de vacinação em massa (Schneider *et al.* 2011) [EC1]. Embora a Costa Rica, a Guiana Francesa, a Guiana, o Panamá, o Suriname e o Uruguai estejam livres da raiva canina, outros países ainda relatam casos (Velasco-Villa *et al.* 2017) [EC1]. De acordo com o Sistema de Vigilância Epidemiológica da Raiva da Organização Panamericana de Saúde (OPAS), de 2010 a 2012 a Bolívia e o Haiti obtiveram a mais alta incidência de raiva humana transmitida por cães no hemisfério ocidental: 15% (6/40) e 40% (16/40) de todos os casos, respectivamente (Vigilato *et al.* 2013) [EC1].

### **Leishmaniose visceral canina**

A leishmaniose visceral canina (LVC) pode ser observada do México até a Argentina, com casos autóctones relatados em vários países. O número de cães infectados na América Latina é estimado em milhões, havendo altas taxas de infecção, especialmente no Brasil (Marcondes & Day 2019). A maioria dos estudos epidemiológicos é conduzida utilizando sorologia, no entanto a utilização da PCR em áreas endêmicas tem confirmado que a prevalência da infecção nos cães é muito maior do que a soroprevalência (Baneth *et al.* 2008). A soroprevalência da LVC nas áreas endêmicas do Brasil varia de 3,1 a 36,0% (Rosypal *et al.* 2007, Belo *et al.* 2017, Marcondes & Day 2019) [EC1].

A soroprevalência da LVC aumentou no Paraguai entre 2005 e 2016, com valores variando de 23% a 32% (Miret *et al.* 2010, Portillo *et al.* 2011) [EC1]. A maioria dos casos estava concentrada nos arredores da capital do país, Assunção, onde a soroprevalência alcançou 69% em cães de rua em 2010 (Miret *et al.* 2011) [EC1]. Em 2006, quando o primeiro caso de LVC foi relatado na Argentina, a prevalência de LVC (baseada em sorologia e/ou PCR) era de 57,3% (Cruz *et al.* 2010) [EC1].

No Uruguai, um levantamento em Salto, uma cidade na fronteira com a Argentina, encontrou 22% de soroprevalência para *Leishmania* spp. (Satrugno *et al.* 2017) [EC1]. Estudos de soroprevalência da LVC no México, Venezuela e Colômbia relataram valores entre 1,7 e 15,7% (Arjona-Jiménez *et al.* 2012, López-Céspedes *et al.* 2012), 5,6 e 40,0%, (Zerpa *et al.* 2000, 2001, 2003, Feliciangeli *et al.* 2005) e 1,6 e 36,0% (Fernández *et al.* 2002, Cortés 2006, Rosypal *et al.* 2007, Paternina-Gómez *et al.* 2013), respectivamente [EC1].

## **Doenças infecciosas felinas na América Latina**

### **Parvovírus felino**

Poucos estudos foram publicados em periódicos revisados por pares com um diagnóstico confirmado desta doença. No sul do Brasil, 69,1% (67/97) dos gatos testados eram soropositivos para o FPV; 100% (11/11) dos gatos vacinados, 66,6% (34/51) dos gatos não vacinados e 62,8% (22/35) dos gatos com história de vacinação desconhecida (Johann *et al.* 2009) [EC1]. De 1996 a 2012, foi feito exame necroscópico em 1850 gatos em um hospital universitário do sul do Brasil. Desses, 33 (1,78%) possuíam diagnóstico de infecção por FPV confirmado por imuno-histoquímica (Castro *et al.* 2014) [EC1]. Um estudo conduzido no Brasil (2004 a 2005) em 51 amostras fecais de 46 gatos domésticos não vacinados apresentando diarreia e de cinco assintomáticos, confirmou a infecção pelo FPV por PCR em seis (11,76%) gatos (Garcia *et al.* 2011) [EC1].

### **Infecção do trato respiratório superior felino**

Poucos estudos foram publicados em periódicos revisados por pares com diagnóstico confirmado de infecção por FHV1, FCV ou *C. felis*. Um estudo com 302 gatos do sul do Brasil com e sem sinais clínicos de doença respiratória, relatou isolamento de FHV1 e FCV, com confirmação por PCR, em 11,2% (34/302) e 8,6% (26/302) dos gatos, respectivamente (Henzel *et al.* 2012) [EC1]. Em outro estudo no Brasil com 108 filhotes não vacinados, com e sem conjuntivite, 57,4% (62/108) apresentavam infecção por FHV1, 37,0% (40/108) por FCV e 24,1% (26/108) por *C. felis*, confirmadas por PCR (Baumworcel *et al.* 2017) [EC1]. *C. felis* foi também identificada por PCR em 6,2% (9/145) (Seki *et al.* 2010) [EC1] e em 58% (18/31) (Gonsales *et al.* 2013) [EC1] dos gatos com sinais clínicos em dois estudos no Brasil.

### **Retrovírus felinos**

A maioria dos estudos de prevalência de infecção por FeLV e FIV são provenientes do Brasil. Embora haja estudos disponíveis através dos repositórios universitários em países como Argentina, Chile, Guatemala e México descrevendo alta prevalência de infecção por FeLV, poucos deles foram publicados em periódicos revisados por pares. Nos países desenvolvidos, a prevalência de infecção por FeLV é geralmente baixa, no entanto, em alguns países da América Latina a prevalência parece ser elevada.

A prevalência de infecção por FeLV relatada no Brasil varia de acordo com a região estudada, com valores de 0,33% (1/302) por ensaio imunoenzimático (ELISA) (Sobrinho *et al.* 2011), 1,1% (1/90) por ELISA (Marcondes *et al.* 2018), 2,6% (6/230) por imunocromatografia (Lacerda *et al.* 2017), 11,52% (126/1094) por imunofluorescência indireta (RIFI) (Almeida *et al.* 2012), 22,26% (55/247) por ELISA (Biezus *et al.* 2019), 32,5% (13/40) por ELISA (Teixeira *et al.* 2007), 38,3% (46/120) por RIFI (Meinerz *et al.* 2010) e 47,5% (507/1072) por PCR (Coelho *et al.* 2011) [EC1]. A ocorrência de leucemia foi associada à infecção pelo FeLV em 78,4% (29/37) dos casos em um estudo conduzido no Brasil (Cristo *et al.* 2019a,b) [EC1].

A prevalência do FIV no Brasil parece ser menor do que a do FeLV, com estudos demonstrando valores de 3,33% (15/450) por PCR (Caxito *et al.* 2006), 4,14% (6/145) por PCR (Teixeira *et al.* 2007), 5,5% (5/90) por ELISA (Marcondes *et al.* 2018), 5,63% (17/302) por ELISA (Sobrinho *et al.* 2011), 5,84% (16/247) por ELISA (Biezus *et al.* 2019), 6,1% (14/230) por imunocromatografia (Lacerda *et al.* 2017), 6,1% (9/148) por ELISA e PCR (Teixeira *et al.* 2019) e 14,7% (67/454) por PCR (Lara *et al.* 2008) [EC1]. Em um estudo conduzido no sul do Brasil com 40 gatos apresentando sinais clínicos de infecção por FIV, 15 (37,5%) tiveram a infecção confirmada por PCR (Caldas *et al.* 2000) [EC1].

Na Argentina, gatos com sinais clínicos compatíveis com infecção por retrovírus foram avaliados e a infecção pelo FIV foi confirmada por imunocromatografia em 21,45% (55/255) e por PCR em 20,34% (52/255) dos gatos, enquanto a prevalência do FeLV foi de 7,64% (14/255) por imunocromatografia e 11,82% (30/255) por PCR (Novo *et al.* 2016) [EC1].

Na península de Yucatan no México, a soroprevalência da exposição retroviral em uma população de gatos foi relatada como sendo de 2,5% (5/227) para FIV e 7,5% (17/227) para FeLV (Ortega-Pacheco *et al.* 2014) [EC1].

Um estudo conduzido em uma ilha chilena encontrou uma prevalência de infecção pelo FeLV, por PCR, de 33% (26/78) (Mora *et al.* 2015) [EC1]. A soroprevalência da exposição retroviral em um estudo transversal realizado com uma amostragem de gatos domésticos, obtida por conveniência, na grande região metropolitana da Costa Rica, foi de 16,7% (17/102) para FeLV e 8,8% (9/102) para FIV (Blanco *et al.* 2009) [EC1]. A soroprevalência da exposição retroviral de gatos residentes em um abrigo na Venezuela foi de 2,1% (2/95) para FeLV e 3,1% (3/95) para FIV (Pino *et al.* 2015) [EC1]. Um estudo conduzido na Colômbia encontrou uma soroprevalência de 10,7% (184/1718) para FIV (Molina *et al.* 2016) e um estudo na Guatemala relatou uma soroprevalência de 16,7% (5/30) para FeLV (Lickey *et al.* 2005) [EC1].

### **Infecção pelo vírus da raiva canina**

A raiva em gatos foi relatada em 15 países da América Latina (Argentina, Bolívia, Brasil, Chile, Colômbia, Cuba, República Dominicana, El Salvador, Honduras, México, Nicarágua, Paraguai, Peru e Venezuela) de 2005 a 2015 (Velasco-Villa *et al.* 2017) [EC1].

### **Vacinas e prática de vacinação na América Latina**

As informações sobre a prática de vacinação foram derivadas das reuniões com os principais líderes de opinião, do questionário e das visitas às clínicas. Sabe-se que há sub-vacinação das populações de animais de estimação nos países da América Latina; por exemplo, os líderes de opinião argentinos estimaram que apenas 20 a 35% dos animais de estimação eram vacinados e os líderes de opinião do Brasil sugeriram que 17% dos cães e 6 a 9% dos gatos eram levados para uma visita anual ao veterinário (e vacinação).

As vacinas para animais de estimação estão disponíveis aos médicos veterinários em toda a América Latina. Existem duas fontes principais desses produtos. A maioria das vacinas é produzida pelas principais indústrias farmacêuticas mundiais, e são os mesmos produtos, ou produtos relacionados, comercializados em outras regiões e países do mundo. Tais produtos são respaldados por dossiês de licenciamento norte-americanos e/ou europeus que descrevem sua qualidade, segurança e eficácia, e geralmente por literatura científica independente revisada por pares. Neste documento, vamos denominar esses produtos de “vacinas internacionais” ou “vacinas de qualidade garantida”. A segunda fonte de vacinas são, menos comumente, os fabricantes nacionais. O VGG não conseguiu avaliar a qualidade, a segurança e a eficácia de tais produtos, que geralmente não são respaldados por literatura científica independente revisada por pares. Por esse motivo, todas as recomendações deste documento (com a única exceção das vacinas contra *Leishmania* no Brasil, que serão discutidas especificamente abaixo) se referem somente às vacinas internacionais de qualidade garantida.

No entanto, embora a maioria das vacinas seja derivada de fabricantes internacionais, existem produtos diferentes, e muito menos linhas de produtos disponíveis nos países da América Latina, quando comparados aos mercados, por exemplo, dos Estados Unidos ou da Europa. Existem: (1) menos produtos da linha de um fabricante disponíveis, (2) produtos únicos de um fabricante internacional que não estão disponíveis em outras regiões (p. ex., a vacina contra *Giardia*, que foi removida da maioria dos mercados globais, com exceção da América Latina, e será discutida especificamente abaixo), (3) uma tendência para vacinas polivalentes (com múltiplos antígenos) ao invés das combinações com menos antígenos que estão atualmente amplamente disponíveis em outros locais e (4) diferenças com relação à duração de imunidade licenciada para a mesma vacina comercializada em outras partes do mundo e na América Latina. Todos esses fatores tornam difícil para os veterinários da América Latina vacinar de acordo com as atuais diretrizes globais de vacinação da WSAVA. Em particular, a administração das vacinas essenciais a cães e gatos adultos em frequência não maior do que a cada 3 anos é um grande desafio, uma vez que não é possível obter vacinas essenciais com apenas três componentes (p. ex., uma combinação de CDV, CAV e CPV2 ou uma combinação de FPV, FHV1 e FCV). Esses antígenos essenciais encontram-se associadas com múltiplos antígenos não essenciais em vacinas polivalentes. O desafio torna-se maior quando a duração da imunidade (DI) licenciada para antígenos essenciais na América Latina é de 1 ano, enquanto produtos idênticos em outros mercados trazem a declaração de DI mínima de 3 anos. Como verificamos em outros locais, existe uma relutância em aceitar que um produto licenciado para 1 ano possa ser usado, “fora da indicação”, a cada 3 anos (com consentimento informado do cliente), embora o produto idêntico seja autorizado para utilização deste modo em outras regiões do mundo. Esse “estágio de transição” no uso de vacinas essenciais foi mais rapidamente adotado pelos veterinários da América do Norte e Europa do que tem sido, ou provavelmente será, nos mercados como os da América Latina.

Como verificamos na Ásia, existem também desafios em torno da vacinação contra raiva em clínicas veterinárias (em oposição às campanhas de vacinação em massa conduzidas pelo governo). A vacinação antirrábica é obrigatória por lei e deve ocorrer anualmente, sendo que atualmente as vacinas antirrábicas inativadas internacionais possuem uma DI licenciada de 1 ano na maioria dos países da América Latina. Contudo, produtos idênticos em outros mercados globais



possuem atualmente uma DI licenciada de 3 anos. Para que haja um avanço na América Latina, os fabricantes e as agências regulatórias precisarão trabalhar para estender a indicação da DI desses produtos utilizados em clínicas veterinárias e, ao mesmo tempo, as associações profissionais veterinárias precisarão fazer pressão para alterar a lei (como já aconteceu em vários outros países), de modo que esta fique condizente com a ciência.

Além do mais, ainda existe um costume fundamental na América Latina de que as clínicas veterinárias geram uma proporção importante de sua receita por meio da venda de vacinas aos clientes. Em nossas visitas às clínicas, notamos repetidamente grandes placas, sobre a mesa de recepção das clínicas, que relacionavam as vacinas comercializadas e seus preços. Isso deixou claro que os clientes, com ou sem o aconselhamento do veterinário, precisariam selecionar as vacinas que seus animais receberiam com base em suas condições de pagamento. Os conceitos de “*check up*” anual e incorporação da vacinação em um programa de cuidados preventivos de saúde para o animal de estimação (um “plano de saúde” da clínica) foram novidade para vários membros da comunidade veterinária na América Latina. Pelo fato de a venda de vacinas sustentar a receita das clínicas, existe também uma cultura de que “mais é melhor”. Os veterinários quase que exclusivamente administram a vacinação anualmente, utilizando a vacina que contenha a maior combinação de antígenos. Os clientes foram acostumados a visitar o veterinário anualmente para um “reforço vacinal”. A administração anual de vacinas contendo múltiplos componentes é considerada preferível, pelo fato de que o cliente é levado a acreditar que esta abordagem seja a melhor. Foi-nos dito repetidamente que os veterinários “perderiam seus clientes” se não oferecessem vacinação anual com o maior número possível de antígenos. Há um certo “círculo vicioso” neste conceito, pois os fabricantes continuam a fornecer e promover produtos com múltiplos componentes que podem incluir (para o cão) algo como até 10 antígenos diferentes.

Um problema adicional enfrentado pelos veterinários da América Latina é que a vacinação de um animal de estimação não é restrita à clínica veterinária. Os pet shops podem vacinar filhotes de cães e gatos antes da venda e os donos podem obter vacinas para a administração em seus animais, utilizando protocolos vacinais considerados deficientes.

Da mesma forma que o VGG observou durante o projeto na Ásia, existem também questões comuns e simples relacionadas à “gestão operacional da vacina” nas clínicas veterinárias da América Latina. Estas estão amplamente relacionadas ao armazenamento de vacinas na clínica, que frequentemente ocorre em refrigeradores domésticos de uso múltiplo, sem monitoramento da temperatura e com armazenamento de múltiplos medicamentos (e frequentemente alimentos e bebidas para consumo humano). Durante nosso projeto asiático, o VGG produziu algumas diretrizes simples para a gestão operacional efetiva da vacina e essas são replicadas e estendidas neste documento (Tabela 3) para auxiliar os médicos veterinários da América Latina.

Embora as diretrizes globais de vacinação da WSAVA de 2016 tenham sido traduzidas para o espanhol e português e estejam disponíveis gratuitamente no site da WSAVA, ficou claro que a maioria dos veterinários (exceto os principais líderes de opinião) não tinham conhecimento delas e não as tinham lido. Durante nossas visitas aos países, houve frequentemente publicidade na imprensa veterinária referente ao projeto da WSAVA e houve tradução simultânea para a língua do país nos nossos eventos de educação continuada.

Concomitantemente ao projeto do VGG na América Latina houve um projeto realizado pela Federação Iberoamericana de Associações Veterinárias de Animais de Companhia (FIAVAC). O projeto foi gerenciado pelo Comitê Latinoamericano de Vacinologia de Animais de Companhia (COLAVAC) e teve como objetivo produzir diretrizes de vacinação que considerem as idiosincrasias epidemiológicas e culturais da prática veterinária na América Latina. O estabelecimento do COLAVAC está inteiramente dentro do espírito das diretrizes de vacinação da WSAVA. As diretrizes da WSAVA de 2016 estabelecem claramente que “Estas diretrizes não são um decreto obrigatório, mas de preferência devem ser usadas pelas associações nacionais e clínicas veterinárias para desenvolver esquemas de vacinação relevantes para a situação local”. O COLAVAC é precisamente, portanto, um exemplo daquela recomendação, e congratulamos a FIAVAC por esta importante iniciativa. As diretrizes do COLAVAC foram disponibilizadas para o Brasil, Argentina e México (<http://www.fiavac.org/guias.php>) e recentemente, em uma publicação científica, para o Peru (Rubio *et al.* 2018); no entanto, os leitores notarão que as diretrizes diferem em suas recomendações de uso das mesmas vacinas nos três países, diferindo às vezes das recomendações feitas pelo VGG no presente manuscrito. Existem algumas razões importantes que podem explicar essa última observação, e elas estão relacionados ao que se considera um trabalho ideal realizado por um grupo de especialistas que produz diretrizes. Em primeiro lugar, esse grupo de especialistas deve ser completamente independente da indústria de vacinas e não deve incluir representantes da indústria nos comitês, ou ter a colaboração ou o direito de veto de patrocinadores ligados à indústria. Como os leitores podem observar pela declaração do Conflito de Interesse que encerra o presente manuscrito, o VGG é considerado um comitê acadêmico completamente independente. Em segundo lugar, as diretrizes devem ser baseadas em evidência e respaldadas, sempre que possível, por literatura científica publicada em revistas científicas cuja avaliação é feita por pares. O VGG desenvolveu uma hierarquia baseada em evidência para a vacinologia (Day *et al.* 2016), que é aplicada às suas diretrizes globais e agora regionais. Finalmente, as próprias diretrizes devem ser submetidas à revisão por pares e ser publicados em uma revista científica respeitável e não em uma revista ligada à indústria. Os documentos do VGG sempre foram submetidos a esse escrutínio independente, e são publicados na revista científica oficial da WSAVA, o *Journal of Small Animal Practice*.

**Tabela 3. Gestão operacional das vacinas: pontos principais para os médicos veterinários**

- As vacinas devem ser mantidas em um refrigerador que seja utilizado para armazenar apenas medicamentos e vacinas (não gêneros alimentícios ou bebidas).
- O suprimento de eletricidade para o refrigerador das vacinas deve ser protegido contra desligamentos inadvertidos com o uso de geradores, tomadas elétricas que não podem ser desligadas ou um plugue claramente marcado “não desligue”.
- As vacinas (particularmente vacinas com adjuvantes) possuem uma temperatura de armazenamento ideal geralmente entre 2 e 8°C (os refrigeradores domésticos devem ser mantidos a 4°C). Esses produtos não devem ser congelados ou posicionados próximos ao compartimento do congelador e a temperatura do refrigerador deve ser monitorada regularmente com o uso de um termômetro de máxima e mínima localizado no corpo principal do refrigerador. O ideal é que a temperatura do refrigerador seja registrada em gráfico em um livro de registro, diariamente.
- As vacinas devem ser armazenadas no refrigerador com espaço adequado para circulação de ar permitindo que seja mantida uma temperatura constante ao redor dos produtos.
- As vacinas devem ser armazenadas no refrigerador dentro da embalagem do fabricante.
- Determinadas prateleiras devem ser designadas para vacinas específicas e a localização das vacinas mantida em uma lista fora do refrigerador. Isto diminuirá o tempo que a porta é mantida aberta ao acessar as vacinas.
- Devem ser mantidos estoques de vacinas corretos, sem excesso.
- O estoque deve ser movimentado de modo que o novo estoque seja colocado na parte do fundo do refrigerador.
- As vacinas transportadas para o campo devem também ficar sujeitas à continuação da “cadeia fria”. Elas devem ser transportadas em uma caixa térmica, mas não colocadas em contato direto com o gelo ou com as bolsas de gelo.
- As vacinas liofilizadas devem ser reconstituídas imediatamente antes do uso, com o diluente apropriado ou a vacina líquida administrada concomitantemente (de acordo com as especificações do fabricante). Não é uma boa prática, e é contraindicado, preparar logo cedo as vacinas previstas para serem utilizadas durante o dia. Alguns componentes das vacinas (por exemplo, CDV, FHV-1) são particularmente instáveis e, portanto, essas vacinas podem não induzir imunidade adequada se não forem reconstituídas imediatamente antes do uso.
- As vacinas só devem ser misturadas na mesma seringa se isto for especificado como aceitável nas bulas do fabricante.
- As seringas e agulhas utilizadas para vacinação não devem ser reutilizadas.
- Os locais da injeção da vacina não devem ser esterilizados com álcool ou outros desinfetantes, pois isto pode inativar as vacinas infecciosas (contendo vírus vivo modificado).
- As vacinas devem estar “dentro da data de validade” e detalhes precisos dos números de lotes, componentes e local da injeção devem ser anotados na ficha médica do animal.

## RECOMENDAÇÕES DO VGG PARA A AMÉRICA LATINA

### Educação

É desafiador fazer recomendações relacionadas à educação universitária em uma região onde existe tanta diversidade de recursos e padrões entre as faculdades de veterinárias públicas e privadas, e a ausência de um currículo nacional. Há uma preocupação da própria profissão veterinária a respeito dos padrões de ensino em um mercado de faculdades particulares em rápida ascensão. O VGG só pode enfatizar a importância de uma base sólida no ensino tradicional de imunologia e microbiologia veterinária no que se refere a doenças infecciosas e vacinologia de pequenos animais, além do ensino da comunicação com o cliente e de vacinação em um ambiente clínico, que devem ocorrer durante os anos de atividade clínica do curso de medicina veterinária. Os professores universitários que ensinam estes elementos curriculares devem ser estimulados a terem pleno conhecimento das diretrizes globais de vacinação da WSAVA.

Há também claramente uma enorme necessidade de educação continuada a médicos veterinários na área de vacinologia de pequenos animais. Isto é, em grande parte, de responsabilidade das associações profissionais e da indústria veterinária. É encorajador ver algumas das iniciativas para esses assuntos serem incorporadas em programas de congressos e fazendo parte do conteúdo de seminários para veterinários nos países da América Latina. O uso de ensino por meio eletrônico (isto é, através de webinars) está se tornando cada vez mais difundido na América Latina e a vacinologia deve compreender um valioso componente de tais programas. A própria WSAVA espera desenvolver uma plataforma online para o fornecimento de educação continuada em um futuro próximo e as diretrizes de vacinação farão parte desse conteúdo. Seria benéfico se pudessem ser mantidas discussões na América Latina sobre a transição para a obrigatoriedade de desenvolvimento profissional contínuo para fins de renovação de registro de profissionais veterinários.

### Pesquisa

Como pode ser visto pelo resumo dos dados científicos sobre as doenças infecciosas e vacinologia de pequenos animais apresentados acima, há uma falta marcante de informações relevantes disponíveis para a profissão veterinária na América Latina. Devido ao grande número de escolas de veterinária e de docentes ligados ao ensino da microbiologia e imunologia, é desapontador verificar que existem poucos programas de pesquisa nesta importante área da medicina veterinária. É provável que isto seja o reflexo de vários fatores possíveis: (1) que nas instituições privadas haja um foco no ensino ao invés de na pesquisa, (2) que seja um grande desafio obter recursos para pesquisas em doenças infecciosas de pequenos animais que não tenham potencial zoonótico (p. ex., cinomose), (3) que possa haver maior reconhecimento acadêmico quando se realizam pesquisas em doenças de animais de produção, e (4) que falte infraestrutura de laboratórios de diagnóstico para empreender programas de vigilância de doenças infecciosas. Embora grande parte da literatura científica

revisada pelo VGG tenha sido gerada no Brasil, é alarmante ver, nesse país, o número atual de cortes de recursos financeiros governamentais para a educação e pesquisa, particularmente em programas que apoiam o treinamento da próxima geração de cientistas veterinários, por meio de cursos de mestrado e doutorado.

O VGG apoia fortemente a realização de pesquisas clinicamente relevantes sobre doenças infecciosas de pequenos animais. Particularmente, o desenvolvimento de um claro entendimento da prevalência regional dos diferentes agentes infecciosos e a classificação dos agentes infecciosos que circulam na região (p. ex., sorovares específicos de leptospiros patogênicas). Existem claramente alguns aspectos distintos na epidemiologia de doenças infecciosas na América Latina, em particular a maior prevalência observada de infecções retrovirais felinas. Somente gerando dados atualizados sobre a ocorrência de doenças e a avaliação molecular haverá avanços no diagnóstico clínico, na disponibilidade de vacinas e no controle dessas doenças. Conforme sugerimos na Ásia, pode haver benefício mútuo para os pesquisadores de universidades que trabalhem mais estreitamente com a indústria farmacêutica, de modo a gerar dados clinicamente relevantes que possam ser utilizados para introduzir novas vacinas na América Latina em benefício da profissão e dos animais dos quais cuidamos.

### **Fornecimento de vacinas**

Como ficará claro pelas recomendações feitas abaixo, há um desafio particular na implementação das diretrizes globais de vacinação na América Latina. Isto está relacionado simplesmente à falta de linhas de produtos com um mínimo de antígenos que estão amplamente disponíveis na América do Norte, Europa e em outros mercados, e que permitem que os veterinários daqueles países vacinem de acordo com as diretrizes da WSAVA. Até que haja uma mudança das vacinas multiantigênicas (contendo algo como até 10 diferentes antígenos) em direção às vacinas essenciais trivalentes ou bivalentes e às vacinas não essenciais monovalentes ou bivalentes, será desafiador para os veterinários da América Latina adotar os novos padrões em vacinologia que estão agora bem incorporados em muitos outros países. Quando tais linhas de produtos estiverem mais amplamente disponíveis (atualmente somente na Argentina), será então necessária uma educação sobre a melhor forma de sua utilização e uma mudança radical nos costumes, para adotar o conceito de saúde preventiva fornecida através de uma verificação anual da saúde ou um plano de saúde, em oposição à deliberada comercialização de vacinas como condutores comerciais de importância central na clínica veterinária.

Um desafio importante para fazer tais mudanças está na identificação de quem tem responsabilidade por conduzir essa mudança. Indiscutivelmente, a indústria veterinária deve liderar trazendo linhas de produtos reformulados para a América Latina, mas isto não pode acontecer sem o suporte da profissão veterinária através das associações profissionais, e sem alguma flexibilidade nas exigências para licenciamento de vacinas. Com relação a este último, o VGG apoia a aceitação de estudos para a concessão de licenças realizados em outros países para se obter novas licenças. No mínimo, não ter que realizar estudos adicionais para produtos que já estão licenciados nos mercados norte-americano ou europeu, propiciaria benefícios significativos para o bem-estar dos animais.

Há ainda o desafio das vacinas veterinárias estarem disponíveis diretamente para os donos e criadores fora do ambiente da clínica veterinária. Deve haver uma mudança de mentalidade para que as clínicas veterinárias que simplesmente vendem vacinas passem a vender um programa de cuidados de saúde preventiva, baseado em aconselhamento profissional, para reeducar os clientes e atraí-los de volta para a clínica veterinária.

### **Vacinação canina: protocolos ambiciosos**

O VGG recomenda que os veterinários da América Latina implementem os princípios básicos da vacinologia de animais de estimação baseados em evidência apresentados nas diretrizes globais de vacinação da WSAVA de 2016 (Tabela 4; Day *et al.* 2016) [EC1]. Compreender o conceito de vacinas essenciais *versus* não essenciais é fundamental para a aplicação das diretrizes de vacinação. As vacinas essenciais são aquelas que todo o cão, independente da localização ou estilo de vida, deve receber para proteção contra infecções que causem morbidade significativa ou doença grave ou fatal. As vacinas essenciais contêm CDV, CAV2 e CPV2, preferivelmente na forma de vírus vivos modificados (vacina contendo vírus vivo modificado; VVM). Nos países onde a raiva canina continua sendo uma doença endêmica a vacina antirrábica inativada é também considerada uma vacina essencial para todos os cães. As vacinas não essenciais são aquelas consideradas para animais cuja localização geográfica ou estilo de vida os coloca em risco de adquirirem infecções específicas. As vacinas não essenciais não são necessárias para todos os animais e não devem ser usadas onde não houver evidência de uma doença ou quando o risco de exposição for mínimo. As vacinas não essenciais incluem as vacinas contra *Leptospira* e as vacinas destinadas a proteger contra elementos do CRIC, que geralmente contêm *B. bronchiseptica* com ou sem CPiV. As diretrizes globais da WSAVA classificam algumas vacinas como não recomendadas para qualquer cão porque não há evidência científica suficiente para justificar seu uso. Estas incluem a vacina contra coronavírus entérico (não pantrópico) (CCoV entérico) e a vacina contra Giardia quando usadas para prevenir ou tratar uma infecção.

O CCoV é considerado de menor importância clínica como patógeno entérico primário, causando apenas leve diarreia nos filhotes. Doença entérica mais severa ocorre com coinfeção por CCoV e CPV2 (Decaro *et al.* 2004) [EC1]. Estudos publicados demonstraram que as vacinas comerciais inativadas contra CCoV entérico induzem apenas respostas transitórias de anticorpos séricos e não reduzem a infecção viral ou a disseminação fecal comparadas aos cães não vacinados (Pratelli *et al.* 2003, de Castro *et al.* 2010) [EC1]. Além do mais, a vacina injetável contra CCoV não leva à elevação da concentração de anticorpos IgA fecais específicos contra o CCoV, que se acredita sejam os responsáveis pela imunoproteção (Decaro *et al.* 2004) [EC1].

Similarmente, os cães vacinados com uma vacina comercial inativada contra *Giardia* não foram protegidos da infecção por *Giardia*, visto que não houve diferenças nas taxas de detecção de cistos parasitários ou antígenos ou na ocorrência da diarreia entre os cães vacinados e os não vacinados (Anderson *et al.* 2004, Lund *et al.* 2010) [EC1]. Além disso, o tratamento dos animais infectados por *Giardia* com uma vacina comercial inativada contra *Giardia* não foi eficaz na eliminação da produção de cistos (Anderson *et al.* 2004) [EC1].

**Tabela 4. Um programa de vacinação ambicioso para os médicos veterinários da América Latina**

| Tipo de vacina                                                                                                                                                                                                                                                                                                                                                                                                                                                                                                               | Vacinação de cães e gatos filhotes                                                                                                                                                                                                                                                                                                                                                                                                                                                                                                                                                                             | Revacinação dos animais adultos                                                                                                                                                                                                                                                                                                                                                                                                                                                                 |
|------------------------------------------------------------------------------------------------------------------------------------------------------------------------------------------------------------------------------------------------------------------------------------------------------------------------------------------------------------------------------------------------------------------------------------------------------------------------------------------------------------------------------|----------------------------------------------------------------------------------------------------------------------------------------------------------------------------------------------------------------------------------------------------------------------------------------------------------------------------------------------------------------------------------------------------------------------------------------------------------------------------------------------------------------------------------------------------------------------------------------------------------------|-------------------------------------------------------------------------------------------------------------------------------------------------------------------------------------------------------------------------------------------------------------------------------------------------------------------------------------------------------------------------------------------------------------------------------------------------------------------------------------------------|
| <p>Vacinas essenciais de qualidade garantida contendo VVM.<br/>Para cães, contendo CDV, CAV e CPV2.<br/>Para gatos, contendo FPV, FCV e FHV1.</p>                                                                                                                                                                                                                                                                                                                                                                            | <p>Iniciar às 6-8 semanas de idade e então a cada 2 a 4 semanas até 16 semanas de idade ou mais [EC1].<br/>A vacinação essencial pode ser iniciada mais cedo, mas nunca antes de 4 semanas de idade com produtos contendo VVM. Para cães filhotes, um produto contendo alto título de CDV e CPV2 pode ser usado às 4 a 6 semanas de idade (se disponível) antes de trocar para a vacina essencial trivalente às 8 semanas de idade ou mais [EC1].<br/>Uma quarta vacina deve ser administrada entre 6 e 12 meses de idade <b>OU</b> 12 meses após a terceira vacina <b>OU</b> aos 12 meses de idade [EC4].</p> | <p>A revacinação com vacinas essenciais de qualidade garantida contendo VVM não deve ser mais frequente do que a cada 3 anos [EC1]. A sorologia pode ser usada para monitorar a imunidade protetora (para CDV, CAV, CPV2 e FPV) e ajudar na tomada de decisão sobre os intervalos da revacinação [EC1].<br/>A única exceção a isto podem ser os gatos em alto risco de contrair vírus do trato respiratório superior, nos quais esses componentes podem ser administrados anualmente [EC1].</p> |
| <p>Vacina antirrábica canina de qualidade garantida para cães ou gato (note que isto não se refere às campanhas de vacinação em massa).</p>                                                                                                                                                                                                                                                                                                                                                                                  | <p>De acordo com as recomendações do fabricante; uma dose a partir de 12 semanas de idade [EC1].<br/>O VGG recomenda que em áreas de alto risco (isto é, NÃO na maioria das áreas da América Latina) uma segunda dose pode ser administrada 2 a 4 semanas após.<br/>Uma segunda vacina em áreas não de alto risco deve ser administrada 12 meses depois ou aos 12 meses de idade.</p>                                                                                                                                                                                                                          | <p>Todas as vacinas antirrábicas caninas de qualidade garantida têm uma DI licenciada de três anos em vários países fora da América Latina [EC1].</p>                                                                                                                                                                                                                                                                                                                                           |
| <p>Vacinas não essenciais.<br/>Exemplos para cães: <i>Leptospira</i>, complexo respiratório infeccioso canino (“tosse dos canis”) e <i>Leishmania</i>.<br/>Exemplos para gatos: vírus da leucemia felina e <i>C. felis</i> (as vacinas contra os vírus da imunodeficiência felina e <i>Bordetella</i> [para gatos] não estão disponíveis na América Latina).<br/><br/>Vacinas não recomendadas.<br/>Estas incluem as vacinas contra coronavírus (canino ou felino), <i>Giardia</i> e <i>Microsporium canis</i>.</p>          | <p>Administrar de acordo com as recomendações do fabricante: geralmente duas doses com 2 a 4 semanas de intervalo. As vacinas não essenciais injetáveis e as vacinas orais contra o CRIC são geralmente administradas a partir de 8 semanas de idade. As vacinas intranasais contra o CRIC podem ser utilizadas mais cedo (siga as recomendações do fabricante) [EC1].</p>                                                                                                                                                                                                                                     | <p>As vacinas não essenciais são geralmente administradas anualmente, a não ser que a bula recomende especificamente de outra forma. As vacinas contra FeLV podem ser aplicadas a cada 2 ou 3 anos em gatos adultos (algumas vacinas contra FeLV de qualidade garantida têm uma DI licenciada de 2 ou 3 anos nos mercados fora da América Latina) [EC1].</p>                                                                                                                                    |
| <p>As informações genéricas desta tabela devem ser lidas em conjunto com as recomendações mais detalhadas fornecidas nas atuais diretrizes de vacinação da WSAVA (Day <i>et al.</i> 2016). A vacinação de acordo com as diretrizes da WSAVA só é possível onde as linhas de produtos disponíveis separem os componentes de vacina não essenciais dos essenciais. Note que estas recomendações se aplicam somente às vacinas de qualidade garantida, a maioria das quais é produzida por grandes empresas internacionais.</p> |                                                                                                                                                                                                                                                                                                                                                                                                                                                                                                                                                                                                                |                                                                                                                                                                                                                                                                                                                                                                                                                                                                                                 |

As diretrizes da WSAVA recomendam a revacinação dos filhotes com vacinas essenciais internacionais contendo VVM a intervalos determinados ao longo dos primeiros 4 meses de idade para superar a interferência dos anticorpos maternos (do inglês Maternally Derived Antibody - MDA) [EC1]. As diretrizes também recomendam que uma vacina essencial final contendo VVM seja administrada entre 6 meses e 1 ano de idade para assegurar que todos os filhotes recebam pelo menos uma dose de vacina que seja capaz de conferir imunidade na ausência de MDA [EC4]. O desenvolvimento de imunidade protetora não depende do número de doses de vacinas essenciais contendo VVM administradas durante a série de vacinação dos filhotes, mas sim de quando elas são administradas. Para os animais adultos, há ampla evidência que respalda a revacinação com vacinas essenciais internacionais de qualidade garantida contendo VVM não mais

frequentemente do que a cada 3 anos (Abdelmagid et al. 2004, Bohm et al. 2004, Mouzin et al. 2004, Gore et al. 2005, Schultz 2006, Larson & Schultz 2007, Mitchell et al. 2012, Killey et al. 2018) [EC1]. Embora as autoridades reguladoras dos países da América Latina exijam a revacinação anual com vacinas essenciais internacionais contendo VVM licenciadas em outros locais para uso a intervalos de 3 anos, esta prática é considerada como uso impróprio dos recursos financeiros do cliente, que seriam melhor aplicados aos exames de saúde anuais, à profilaxia parasitária de rotina e ao tratamento de problemas médicos. Aumentar a frequência da vacinação com vacinas essenciais contendo VVM não confere maior proteção para um animal. Aumentar o número de animais que são adequadamente vacinados é muito mais importante para assegurar a proteção da população ou a imunidade de rebanho, do que vacinar cada animal mais frequentemente. Embora as bulas contendo 3 anos de duração de imunidade para as vacinas essenciais internacionais de qualidade garantida, com VVM, não sejam atualmente aceitas pelos países da América Latina, o VGG incentiva as autoridades reguladoras nacionais e locais a permitirem que os médicos veterinários utilizem estas vacinas de acordo com as diretrizes da WSAVA como produtos com “uso fora da indicação da bula”, com consentimento informado do cliente. Esta abordagem tem sido usada com sucesso em outros países que aguardam a aceitação das bulas das vacinas internacionais de qualidade garantida pelas autoridades nacionais e locais.

### **Vacinação canina: Protocolos pragmáticos**

Os problemas com a disponibilidade das vacinas, a duração de imunidade licenciada para o produto e o conhecimento da prevalência da doença e riscos de exposição dificultam a adoção das diretrizes globais de vacinação da WSAVA pelos veterinários dos países da América Latina. Em muitos desses países há disponibilidade limitada de vacinas internacionais de qualidade garantida de um ou múltiplos componentes que permitam o uso separado de antígenos essenciais de VVM versus antígenos não essenciais. A escassez de estudos, publicados em revistas indexadas que utilizam avaliação por pares, sobre a prevalência de doenças específicas nos países da América Latina faz com que seja um desafio para os médicos veterinários a tomada de decisões baseadas em evidência sobre quais vacinas não essenciais são apropriadas para os animais nas diferentes regiões.

Os médicos veterinários da América Latina e suas associações nacionais devem pressionar a indústria e os órgãos regulamentadores governamentais para o acesso às vacinas caninas internacionais de qualidade garantida que contenham apenas os componentes essenciais de VVM (CDV, CPV2, CAV2) ou os componentes não essenciais (*Leptospira*, CPiV, *Bordetella*). Isto permitirá a administração de vacinas essenciais contendo VVM a cada 3 anos e a vacinação anual separada com vacinas não essenciais para cães em risco. Atualmente, a maioria das vacinas internacionais de qualidade garantida disponíveis nos países da América Latina contém antígenos essenciais de VVM (CDV, CAV2, CPV2) combinados com antígenos não essenciais (*Leptospira*) e antígenos não recomendados (isto é, CCoV entérico). Os médicos veterinários podem seguir algumas recomendações pragmáticas apresentadas na Tabela 5 para fazer a transição da administração dessas vacinas de múltiplos componentes anualmente a todos os cães para o uso de vacinas essenciais e não essenciais separadamente de acordo com as diretrizes da WSAVA. Inclusa neste protocolo pragmático de transição está a administração “fora da indicação”, com o consentimento do cliente, dos componentes das vacinas essenciais contendo VVM a cada 3 anos a cães adultos ao invés de anualmente. O VGG reconhece que o uso deste protocolo pragmático pelos médicos veterinários é limitado pela disponibilidade local dos produtos.

Para os clientes que só podem arcar com uma vacina para seu cão, a abordagem recomendada é escolher uma vacina internacional de qualidade garantida contendo os componentes essenciais de VVM e administrar essa vacina em um momento em que a dose única possa induzir imunidade protetora de longa duração na ausência de interferência dos anticorpos maternos (isto é, aos 4 meses de idade ou mais).

### **Leishmaniose canina na América Latina**

A leishmaniose visceral canina (LVC) causada pela *Leishmania infantum* é uma das doenças zoonóticas mais significativas na América Latina e a distribuição geográfica da LVC está expandindo na região. A LVC está disseminada do México até a Argentina, com casos autóctones relatados em vários países (Marcondes & Day 2019) [EC1]. Embora as vacinas possam prevenir a infecção ativa e o risco de desenvolvimento de doença clínica em alguns cães, alguns cães vacinados podem tornar-se progressivamente infectados e transmitir o parasita para os flebotomíneos, mesmo quando assintomáticos (Bongiorno et al. 2013, Fernandes et al. 2014, Oliva et al. 2014, Regina-Silva et al. 2016) [EC1]. Portanto, para os animais que vivem em áreas endêmicas, do ponto de vista epidemiológico é mais importante usar inseticidas, especialmente coleiras, para prevenir as picadas de flebotomíneos, do que utilizar vacinas (Sevá et al. 2016, Lopes et al. 2018) [EC1]. Sempre que possível, as duas medidas devem ser combinadas para fornecer um alto nível de proteção não só para os cães, mas para outros animais e pessoas que compartilham o mesmo ambiente. É importante destacar que uma história prévia de vacinação não exclui um diagnóstico de LVC nos cães com quadro clínico ou anormalidades clínico-patológicas sugestivos da doença.

Atualmente na América Latina só existem duas vacinas licenciadas contra a LVC. Uma contém a proteína A2 recombinante de *L. donovani* em um adjuvante, licenciada no Brasil e no Paraguai, e a outra consiste em proteínas excretadas-secretadas purificadas de *L. infantum* (LiESP) em um adjuvante, licenciada no Paraguai e na Argentina. O protocolo de vacinação para filhotes inclui três doses administradas com 3 semanas de intervalo e um reforço anual. A vacina contendo proteína recombinante A2 pode ser usada em cães a partir de 4 meses de idade e a vacina contendo LiESP a partir de 6 meses de idade. Os cães adultos que nunca foram vacinados recebem o mesmo protocolo. As vacinas contra LVC só devem ser consideradas para cães que vivam em áreas endêmicas, onde exista risco de serem infectados. De acordo com as recomendações do fabricante, somente cães soronegativos devem ser vacinados; no entanto, vários cães podem estar infectados sem que tenha havido soroconversão e, portanto, ser inadequadamente vacinados.

**Tabela 5. Um programa de vacinação pragmático para os médicos veterinários da América Latina em 2019**

| Tipo de vacina                                                                                                                                                                                                                                                                                                                                                     | Objetivo                                                                                                                                                                                                                                                                                                                                                                    | Vacinação de cães e gatos filhotes                                                                                                                                                                                                                                                                                                                                                                                                                                                                                                                                                                                       | Revacinação dos animais adultos                                                                                                                                                                                                                                                                                                                                                                                                                                                                                            |
|--------------------------------------------------------------------------------------------------------------------------------------------------------------------------------------------------------------------------------------------------------------------------------------------------------------------------------------------------------------------|-----------------------------------------------------------------------------------------------------------------------------------------------------------------------------------------------------------------------------------------------------------------------------------------------------------------------------------------------------------------------------|--------------------------------------------------------------------------------------------------------------------------------------------------------------------------------------------------------------------------------------------------------------------------------------------------------------------------------------------------------------------------------------------------------------------------------------------------------------------------------------------------------------------------------------------------------------------------------------------------------------------------|----------------------------------------------------------------------------------------------------------------------------------------------------------------------------------------------------------------------------------------------------------------------------------------------------------------------------------------------------------------------------------------------------------------------------------------------------------------------------------------------------------------------------|
| <p>Vacinas essenciais para cães e gatos.</p>                                                                                                                                                                                                                                                                                                                       | <p>Selecionar um produto de qualidade garantida contendo VVM que permita que seja administrada a <i>combinação mínima</i> de antígenos essenciais (CDV, CAV, CPV2 para cães; FPV, FHV1, FCV para gatos).</p> <p>Usar um diluente alternativo ao invés de reconstituir com uma vacina não essencial, se essa vacina não essencial não for necessária para aquele animal.</p> | <p>Iniciar às 6-8 semanas de idade e então a cada 2 a 4 semanas até 16 semanas de idade ou mais [EC1].</p> <p>A vacinação essencial pode ser iniciada mais cedo, mas nunca antes de 4 semanas de idade com produtos contendo VVM. Para cães filhotes, um produto contendo alto título de CDV e CPV2 pode ser utilizado às 4 a 6 semanas de idade (se disponível) antes de trocar para a vacina essencial trivalente às 8 semanas de idade ou mais [EC1].</p> <p>Uma quarta vacina deve ser administrada entre 6 a 12 meses de idade <b>OU</b> 12 meses após a terceira vacina <b>OU</b> aos 12 meses de idade [EC4].</p> | <p>Discutir com os clientes a nova abordagem global para a revacinação essencial e obter o consentimento para a administração das vacinas essenciais de qualidade garantida contendo VVM não mais frequentemente do que a cada 3 anos [EC1].</p> <p>A única exceção a isto podem ser os gatos em risco muito alto de contrair vírus do trato respiratório superior. Esses gatos podem ser vacinados anualmente, mas estamos cientes de que o componente de FPV da combinação da vacina não é de fato necessário [EC1].</p> |
| <p>Vacina contra a raiva canina de qualidade garantida para cães ou gatos (note que isto não se refere às campanhas de vacinação em massa).</p>                                                                                                                                                                                                                    | <p>Selecionar um produto internacional de qualidade garantida, se disponível.</p>                                                                                                                                                                                                                                                                                           | <p>De acordo com as recomendações do fabricante; uma dose a partir de 12 semanas de idade [EC1].</p> <p>O VGG recomenda que em áreas de alto risco (isto é, NÃO a maioria das áreas da América Latina) uma segunda dose pode ser administrada 2 a 4 semanas depois.</p> <p>Uma segunda vacina em áreas não de alto risco deve ser administrada 12 meses depois ou aos 12 meses de idade.</p>                                                                                                                                                                                                                             | <p>Seguir as exigências legais locais para revacinação anual, mas continuar a pressionar ativamente as associações e governos para permitir a revacinação trienal usando produtos de qualidade garantida com uma duração de imunidade (DI) licenciada de 3 anos. Continuar a pressionar a indústria para registrar esses produtos com uma DI de 3 anos em seu país.</p>                                                                                                                                                    |
| <p>Vacinas não essenciais.</p> <p>Exemplos para cães: <i>Leptospira</i>, complexo respiratório infeccioso canino (tosse dos canis) e <i>Leishmania</i>.</p> <p>Exemplos para gatos: vírus da leucemia felina e <i>C. felis</i> (as vacinas contra o vírus da imunodeficiência felina e <i>Bordetella</i> [para gatos] não estão disponíveis na América Latina)</p> | <p>Discutir o estilo de vida e o risco de exposição do animal com o cliente - a vacina é realmente necessária para esse animal?</p> <p>Escolher um produto de qualidade garantida que contenha apenas o antígeno desejado ou o antígeno na combinação mínima possível com outros componentes não essenciais.</p>                                                            | <p>Administrar de acordo com as recomendações do fabricante: geralmente duas doses com 2 a 4 semanas de intervalo. As vacinas não essenciais injetáveis e as vacinas orais contra o CRIC são geralmente administradas a partir de 8 semanas de idade. As vacinas intranasais contra o CRIC podem ser administradas mais cedo (siga as recomendações do fabricante) [EC1].</p>                                                                                                                                                                                                                                            | <p>As vacinas não essenciais são geralmente administradas anualmente, a menos que a bula especificamente recomende de outra forma; as vacinas contra FeLV não precisam ser administradas a gatos adultos anualmente (vide a Tabela 4)</p>                                                                                                                                                                                                                                                                                  |
| <p>Vacinas não recomendadas.</p> <p>Estas incluem as vacinas contra coronavírus (canino ou felino), <i>Giardia</i> e <i>Microsporium canis</i>.</p>                                                                                                                                                                                                                | <p>Considerar se existe evidência suficiente para respaldar seu uso.</p>                                                                                                                                                                                                                                                                                                    |                                                                                                                                                                                                                                                                                                                                                                                                                                                                                                                                                                                                                          |                                                                                                                                                                                                                                                                                                                                                                                                                                                                                                                            |
| <p>As informações genéricas desta tabela devem ser lidas em conjunto com as recomendações mais detalhadas fornecidas nas atuais diretrizes de vacinação da WSAVA (Day <i>et al.</i> 2016). Note que estas recomendações se aplicam somente às vacinas de qualidade garantida, a maioria das quais é produzida por grandes empresas internacionais.</p>             |                                                                                                                                                                                                                                                                                                                                                                             |                                                                                                                                                                                                                                                                                                                                                                                                                                                                                                                                                                                                                          |                                                                                                                                                                                                                                                                                                                                                                                                                                                                                                                            |

## Raiva canina na América Latina

Está claro que os programas de vacinação em massa em larga escala conduzidos ao longo das últimas décadas tiveram sucesso no controle da infecção pelo vírus da raiva canina em cães e gatos (e, portanto, na população humana) em vários países da América Latina. Existem, no entanto, “pontos críticos” remanescentes da doença, sendo registrados baixos números de casos em países com bom controle geral. Na maioria dos países da América Latina existe vigilância contínua e vacinação contra a raiva canina anual obrigatória. Isto pode ser realizado através de campanhas de vacinação em massa a campo realizadas por organizações governamentais ou não governamentais, ou da vacinação de animais que vão a clínicas veterinárias. A vigilância e vacinação contínuas para manter a imunidade de rebanho são essenciais neste momento para o controle da raiva canina. Conforme discutido acima, há uma desconexão entre a lei e a ciência com relação às vacinas antirrábicas. Não há dúvidas de que nas campanhas vacinação em massa a campo (particularmente onde estas visam vacinar cães de rua ou cães comunitários) a revacinação anual é essencial. Entretanto, para um animal de estimação que possui um dono e visita o veterinário, a vacinação com uma vacina antirrábica canina internacional de qualidade garantida deve conferir uma duração da imunidade mínima de 3 anos (Day *et al.* 2016) [EC1]. Um movimento para licenciar as vacinas com DI de 3 anos, como os mesmos produtos que existem nos EUA, Canadá e Europa, ajudaria a resolver essa anomalia.

## Vacinação felina: protocolos ambiciosos

Quando se aspira produzir um protocolo de vacinação otimizado para gatos em um local específico, deve-se ter em mente a imensidade e diversidade da América Latina. No entanto, é possível fornecer ampla recomendação aos veterinários da América Latina com base no que foi aprendido sobre doenças infecciosas felinas na região e, mais além, considerando quais vacinas estão disponíveis comercialmente na América Latina.

Os veterinários de todos os países da América Latina devem ser estimulados a seguir a recomendação fundamental fornecida nas mais recentes diretrizes de vacinação da WSAVA (Day *et al.* 2016) (Tabela 4). Como essas diretrizes tornam claro, existem vacinas essenciais que, em um mundo ideal, todos os gatos filhotes e todos os gatos adultos devem receber com frequência suficiente para assegurar a proteção durante toda a vida. Essas vacinas protegem contra agentes infecciosos que podem causar doença grave ou morte, especialmente nos filhotes. Em todos os países, as vacinas contra FPV, FHV1 e FCV são consideradas essenciais (Scherk *et al.* 2013, Day *et al.* 2016) [EC1]. Nos países onde a raiva é endêmica, as vacinas antirrábicas são também consideradas essenciais (Scherk *et al.* 2013, Day *et al.* 2016) [EC1]. Além disso, existem vacinas não essenciais. Nem todo o filhote ou gato adulto precisa necessariamente receber cada uma das vacinas não essenciais. O uso dessas vacinas deve ser baseado em uma análise esclarecida do risco-benefício, baseada no conhecimento da frequência local da doença e no estilo de vida do gato (Day *et al.* 2016) [EC1]. As vacinas não essenciais protegem contra agentes infecciosos que podem ser encontrados frequentemente em algumas áreas, mas são sabidamente raros ou ausentes em outros locais (p. ex., FeLV). Algumas vacinas não essenciais (como por exemplo, aquelas contra a infecção por *C. felis*) protegem contra agentes que são geralmente menos patogênicos do que aqueles cobertos pelas vacinas essenciais, ou são tratáveis usando antibióticos. O VGG categoriza uma vacina felina (contra peritonite infecciosa felina) como “não recomendada”. Embora esta seja uma vacina disponível comercialmente em alguns países (não na América Latina), o VGG julga que não há evidências suficientes de benefícios para recomendar o seu uso rotineiro.

Em alguns países da América Latina (p. ex., Brasil) o FeLV é altamente prevalente em algumas regiões (isto é, o sudeste e o extremo sul do país) e muito menos prevalente em outros, tal como o norte (Almeida *et al.* 2012, Lacerda *et al.* 2017, Biezus *et al.* 2019, Cristo *et al.* 2019a,b) [EC1]. Em geral, a prevalência do FeLV no Brasil parece ser consideravelmente mais alta do que em muitos outros países onde sua prevalência foi estudada (Galdo Novo *et al.* 2016) [EC1]. No México, a prevalência do FeLV mostrou exceder a do FIV em Mérida, no México tropical, mas não corresponde aos valores de prevalência bastante elevados relatados em várias partes do Brasil (Ortega-Pacheco *et al.* 2014) [EC1]. Portanto, recomenda-se que os veterinários da América Latina procurem estabelecer a prevalência do FeLV em sua região para permitir que sejam tomadas decisões baseadas em evidência sobre o uso recomendado (ou não) das vacinas contra FeLV. Este é o modo como as vacinas não essenciais devem ser utilizadas.

Vacinas de alta qualidade contra o FPV, contendo VVM, demonstraram fornecer imunidade robusta de longa duração para a grande maioria dos gatos vacinados quando usadas de acordo com as diretrizes do VGG da WSAVA (Gore *et al.* 2006, Barrs 2019) [EC1]. Como precaução geralmente recomenda-se a revacinação a cada 3 anos. Vacinar mais frequentemente do que a cada 3 anos com vacinas de alta qualidade contra FPV contendo VVM é improvável que forneça qualquer melhora no grau de proteção provido por essas vacinas, e pode aumentar o risco de reações adversas. É muito mais importante assegurar que uma grande proporção da população alvo seja vacinada (isto é, aumentar a imunidade de rebanho em geral) do que aumentar a frequência da revacinação de cada animal na população em risco. De fato, a inútil revacinação anual dos gatos contra o FPV com produtos conhecidos por fornecer vários anos de proteção deve ser vista como uso inadequado dos recursos financeiros, potencialmente limitados, do cliente. Estes poderiam ser melhor aplicados para abordar outros problemas de saúde do animal e talvez usados para comprar vacinas não essenciais, se o uso de uma ou mais delas for respaldado por evidência e, desse modo, justificável naquela região.

Vacinas de alta qualidade contra FCV e FHV1 contendo VVM não fornecem tal proteção robusta e de longa duração como as vacinas contra FPV que acabamos de mencionar (Jas *et al.* 2015) [EC1]. A imunidade conferida por essas vacinas não

consegue prevenir infecção ou o desenvolvimento do estado de portador. No entanto, para os gatos com estilos de vida de “baixo risco” (isto é, gatos que vivem somente dentro de casa e que não visitam gatis de hospedagem) considera-se que a vacinação a cada 3 anos forneça proteção suficiente (Scherk *et al.* 2013, Day *et al.* 2016) [EC4]. Para gatos em risco mais alto de infecção por FCV ou FHV (isto é, gatos com acesso ao ar livre ou gatos que visitam regularmente um gatil de hospedagem), a revacinação anual é recomendada [EC4]. Em alguns países, é possível comprar vacinas que contêm somente FCV e FHV1, de modo que as vacinas trivalentes podem ser usadas a cada 3 anos (FCV, FHV1, FPV) e uma vacina bivalente (FHV1, FCV), se necessária, utilizada em cada um dos anos desse intervalo. Infelizmente, tais produtos não estão, até agora, consistentemente disponíveis em todo o mundo.

As vacinas antirrábicas devem ser usadas de acordo com a regulamentação local. Particularmente, algumas vacinas antirrábicas internacionais de qualidade garantida para uso em gatos fornecem proteção por pelo menos 3 anos (Jas *et al.* 2012) [EC1]. Nos EUA, a regulamentação que exigia a revacinação anual dos gatos, apesar da evidência de proteção muito mais longa de algumas vacinas, foi contestada e alterada em consequência de pressão política da profissão veterinária e dos donos de animais de estimação.

Uma característica crucial de um protocolo de vacinação ideal para gatos em qualquer país inclui o término da série para os filhotes não antes de 16 semanas de idade. Isto se deve à evidência acumulada nos últimos anos, indicando que uma minoria dos filhotes possuía quantidades significativas de anticorpos maternos, que podem interferir com alguns dos componentes das vacinas, mesmo até 20 semanas de idade (Digangi *et al.* 2012, Jakel *et al.* 2012a,b) [EC1]. Um término às 16 semanas ou mais é condizente com esta evidência científica e com as atuais diretrizes de vacinação da WSAVA, assim como com as diretrizes de outras organizações.

As vacinas disponíveis nos países da América Latina podem não possuir recomendações nas bulas para uso conforme descrito nesta seção. Seria de grande valia se os órgãos regulamentadores locais e as orientações das organizações que regulamentam a profissão veterinária permitissem que os médicos veterinários usassem vacinas “fora da indicação” com o consentimento do cliente. Essa abordagem foi usada durante anos por veterinários em outros países, antes de as recomendações das bulas serem finalmente atualizadas. O VGG espera que, no devido tempo, sejam realizadas mudanças nas bulas das vacinas essenciais de qualidade garantida contendo VMM produzidas pelas grandes empresas farmacêuticas internacionais nos países da América Latina.

### **Vacinação felina: protocolos pragmáticos**

Os veterinários de pequenos animais nos países da América Latina são atualmente incapazes de adotar as diretrizes de vacinação da WSAVA na sua totalidade. Isto se deve por inúmeros motivos. Primeiramente, o uso racional das vacinas não essenciais é dificultado em muitas partes da América Latina pela falta de informação sobre a frequência das doenças. Inversamente, para algumas regiões, estão disponíveis excelentes informações detalhadas. Onde falta evidência, os veterinários geralmente decidem seguir uma abordagem cautelosa. Isto pode levar a um uso excessivo desnecessário de vacinas não essenciais. Mais pesquisa e vigilância permitiriam o uso seletivo e mais embasado de vacinas não essenciais.

Em segundo lugar, em muitos países da América Latina há disponibilidade limitada de produtos. Em particular, vacinas essenciais licenciadas e aprovadas para uso bienal, trienal ou menos frequente não se encontram disponíveis em vários países da América Latina. Isto pode ser, em parte, devido a uma falta de evidências científicas geradas localmente para que fosse permitido aumentar a extensão da DI, e a exigência de tal evidências pelas autoridades regulamentadoras locais. No entanto, existem muitas evidências, geradas em numerosos países, que respaldam a visão de que as vacinas essenciais felinas podem ser usadas de forma similar, e com muita confiança, nos países da América Latina como em outras partes do mundo. Embora as atuais bulas de muitas vacinas essenciais de qualidade garantida contendo VMM recomendem a revacinação anual de animais adultos, exatamente as mesmas vacinas são administradas trienalmente em vários outros países, inclusive alguns com alta pressão de doenças infecciosas.

Um outro desafio referente à disponibilidade de produtos na América Latina é a escassez ou falta de vacinas não essenciais monovalentes. Por exemplo, em alguns países, as vacinas contra *C. felis* só estão disponíveis em combinação com os componentes essenciais FPV, FHV1 e FCV e a vacina contra o FeLV só está disponível em combinação com os quatro precedentes. Portanto, existem vacinas para felinos de 3, 4 e 5 componentes, mas poucas ou nenhuma vacina não essencial monovalente. Um veterinário que queira proteger contra o FeLV assim como contra os agentes essenciais, mas que não sinta nenhuma necessidade de proteger contra *C. felis*, pode assim ser forçado a administrar o componente *C. felis*, mesmo se o julgar supérfluo.

Os médicos veterinários e as associações regionais devem, portanto, continuar a pressionar a indústria e os órgãos regulamentadores governamentais para mudanças que alinhariam as recomendações referentes ao uso de vacinas de qualidade garantida àquelas utilizadas em várias outras partes do mundo. A Tabela 5 apresenta algumas recomendações pragmáticas referentes ao uso de vacinas para felinos destinadas a auxiliar os veterinários da América Latina a rumar na direção recomendada.

### **Aplicação de planos de saúde preventivos com uma verificação anual da saúde na América Latina**

Conforme discutido anteriormente nesse documento, ficou claro pelas nossas discussões e visitas às clínicas da América Latina que a cultura dominante na prática veterinária é que os veterinários vendem vacinas para os clientes, que a venda de vacinas é o principal condutor para o atendimento do cliente na clínica veterinária e que a venda de vacinas sustenta um grande componente da receita da clínica veterinária. De fato, há cerca de 25 anos, estes eram os princípios globais que também se aplicavam à prática veterinária na América do Norte, na Europa Ocidental, Austrália, Nova Zelândia, África do Sul e outros mercados desenvolvidos.



Nestes últimos mercados, podemos observar em 2019, essa cultura foi substancialmente substituída por um novo modo de promover os serviços veterinários (incluindo vacinas) aos clientes. Houve um progressivo distanciamento do conceito de “reforço de vacinação anual” ou “consulta para reforço de vacina” em direção à implementação de pacotes de saúde preventiva holística fornecidos em parte por uma consulta de “verificação anual da saúde”. Em mercados mais desenvolvidos isto foi agora estendido para o fornecimento de um “plano de saúde” da clínica pelo qual o cliente pode pagar uma taxa mensal regular para cobrir numerosos elementos de cuidados de saúde preventiva para seus animais de estimação. Considera-se que a consulta para verificação anual da saúde demande um período de tempo maior do que uma consulta geral, e forneça a oportunidade de o veterinário se envolver com o cliente para discutir em detalhes a saúde e o bem-estar geral do animal de estimação, que hoje é um membro da família. Os elementos da consulta de verificação da saúde (ou de um plano de saúde anual) podem incluir considerações sobre nutrição, saúde dentária, questões comportamentais, controle de endoparasitas, ectoparasitas e doenças transmitidas por vetores, e quais vacinas (essenciais ou não essenciais) podem ser administradas durante essa visita anual. De fato, em muitos mercados amadurecidos, a avaliação anual da necessidade de revacinação essencial (CDV, CAV e CPV2 para cães e FPV para gatos) é agora determinada por testes sorológicos realizados na clínica (“teste de títulos de anticorpos”) para determinar se o animal já está protegido e, portanto, não precisa ser revacinado. As diretrizes globais de vacinação da WSAVA mencionam o valor dos testes sorológicos e dão forte apoio para esta abordagem. Há cada vez mais literaturas apoiando o uso desses testes sorológicos na clínica veterinária (p. ex., Killey *et al.* 2018) [EC1]. Além do mais, existe literatura substancial que avalia a consulta de verificação anual da saúde e aconselha sobre o conteúdo, o tempo e a abordagem dessa consulta (p. ex., Belshaw *et al.* 2019) [EC1].

A implementação dessa nova abordagem para o fornecimento de cuidados de saúde preventivos para o animal de estimação pode ser assustadora para muitos veterinários da América Latina. No entanto, essas mudanças precisam ser adotadas para que os profissionais dos países da América Latina acompanhem os colegas dos mercados mais desenvolvidos. Apesar de provavelmente haver um período de transição mais longo para os veterinários que trabalham com clientes com restrições econômicas, esses novos conceitos devem ser mais rapidamente adotados por aqueles que trabalham em áreas de relativa prosperidade.

## AGRADECIMENTOS

O VGG agradece aos numerosos líderes de opinião da Argentina, Brasil e México que viajaram para reunir-se conosco, geralmente por longas distâncias, para compartilhar seu conhecimento e experiência. Agradecemos também aos veterinários daqueles países que nos permitiram visitar suas clínicas e aos vários veterinários que responderam nosso questionário. Somos gratos a nossos colegas da MSD Saúde Animal (MSD Animal Health), a nível nacional, regional e global, que se encarregaram de toda a logística para nossas visitas aos países e particularmente pelo trabalho envolvido na organização dos eventos de educação continuada em cada país.

## Conflito de interesse

O trabalho do VGG foi apoiado financeiramente pela MSD Saúde Animal (MSD Animal Health) que é parceira global da WSAVA. O VGG é um grupo totalmente independente de especialistas acadêmicos que são os autores deste manuscrito, sem consulta à indústria. Os representantes da empresa patrocinadora não participam das reuniões do VGG. A empresa não tem direito de veto sobre as recomendações do VGG.

## PERGUNTAS FREQUENTES

### 1. Por que o VGG não recomenda a vacina contra o coronavírus entérico canino se eu identifico rotineiramente este organismo no exame fecal?

O VGG não recomenda esta vacina por não haver evidências científicas suficientes para justificar seu uso. A evidência de que o coronavírus entérico canino é um patógeno primário que leva a doença intestinal em cães adultos é fraca; a diarreia associada à infecção é leve, a menos que exista infecção concomitante com CPV2. Experimentalmente, o vírus causa apenas leve diarreia, se causar, em cães com mais de 6 semanas de idade, e a vacinação apenas contra o CPV2 parece proteger contra o desafio por ambos os vírus. Não há evidências de que as vacinas disponíveis protegeriam contra formas mutantes patogênicas do vírus que ocasionalmente surgem e têm sido descritas. Há menos evidências ainda de que a vacina pode proteger contra infecção a campo e a vacina injetável não parece induzir anticorpos IgA fecais protetores (Decaro *et al.* 2004). Dados brasileiros não mostram diferença na identificação do coronavírus entérico canino por PCR das fezes de cães normais e de cães com diarreia (Gizzi *et al.* 2014) [EC1].

### 2. A vacina contra giardiase é amplamente usada em toda a América Latina. Porque o VGG não recomenda essa vacina?

O VGG não recomenda esta vacina por não haver evidências científicas suficientes para justificar seu uso. A evidência de que a vacina pode prevenir a disseminação ou a infecção é fraca. Um grande estudo de campo com 6000 cães demonstrou que os filhotes vacinados tinham maior probabilidade de apresentar diarreia do que os não vacinados, e não houve diferença entre esses grupos com relação à detecção de cistos ou antígenos (Lund *et al.* 2010) [EC1]. A doença em cães não causa risco de morte, é raramente zoonótica, é de baixa prevalência e responde à terapia; por estes motivos, a vacina não é recomendada para cães. Não se sabe se a vacina oferece proteção cruzada contra cepas de *Giardia* a não ser aquelas usadas nos estudos de desafio. Dados brasileiros não mostram diferença na identificação de *Giardia* por PCR das

fezes de cães normais e cães com diarreia (Gizzi *et al.* 2014) [EC1]. Deve-se notar que a vacina foi retirada de todos os mercados globalmente com exceção dos da América Latina.

### **3. Há alguma vantagem em utilizar vacinas intranasais ao invés de parenterais para proteger contra elementos do complexo respiratório infeccioso canino?**

Embora os estudos publicados abordando esta questão nem sempre concordem, o VGG acredita que, imunologicamente, a vacinação pela via mucosa tem maior probabilidade de gerar imunidade protetora relevante (especificamente a produção de anticorpos IgA e IgG da mucosa, em oposição a anticorpos IgG sistêmicos) contra patógenos que infectam através das mesmas mucosas (Larson *et al.* 2013) [EC1]. A vacinação intranasal possui o benefício adicional de um rápido início da imunidade, que pode estar relacionada a uma estimulação inespecífica da imunidade inata (por meio dos receptores tipo Toll e da produção de citocinas/quimiocinas locais) [EC4]. Isto pode ser benéfico quando um cão vai ser exposto em breve a um ambiente onde há risco de exposição a elementos do complexo respiratório infeccioso canino (CRIC). As vacinas intranasais podem ser usadas nos filhotes a partir de 3 semanas de idade em dose única, sendo necessária uma revacinação anual. Existem vacinas intranasais disponíveis (dependendo do mercado e nem todas na América Latina) que são específicas somente para *B. bronchiseptica* (Bb), ou Bb em combinação com CPiV, ou Bb em combinação com CPiV e CAV2.

### **4. Ouvi dizer que existem agora vacinas orais contra elementos do complexo respiratório infeccioso canino. Por que não temos essas vacinas em meu país?**

As vacinas orais contra *B. bronchiseptica* estão disponíveis na Austrália, América do Norte e Europa. Esses produtos têm a vantagem da facilidade de administração, mas contêm apenas um único antígeno (Bb) e podem não apresentar o mesmo rápido início da imunidade que os produtos intranasais. Elas podem ser administradas aos filhotes a partir de 8 semanas de idade e requerem revacinação anual. Há variação na literatura científica quanto ao fato de as vacinas contra Bb orais e intranasais conferirem proteção equivalente ou se a proteção é melhor com produtos intranasais (Larson *et al.* 2013, Ellis *et al.* 2016a, Scott-Garrard *et al.* 2018) [EC1]. Quanto ao motivo de esses produtos não estarem disponíveis na América Latina, seria preciso perguntar aos fabricantes e autoridades regulamentadoras responsáveis pelo licenciamento de vacinas.

### **5. O VGG recomenda o uso de uma vacina contra Leishmaniose?**

O VGG classifica as vacinas contra *Leishmania infantum* como não essenciais, o que significa que elas devem ser restritas aos cães em risco em áreas endêmicas para a infecção. As vacinas contra *Leishmania* estão disponíveis somente no Brasil, Argentina e Paraguai. Essas vacinas devem ser consideradas como uma ferramenta na prevenção da leishmaniose visceral canina. Evitar o contato de cães suscetíveis com flebotomíneos (por exemplo, mantendo-os dentro de casa durante os horários de maior atividade dos flebotomíneos) e o uso de medidas preventivas contra flebotomíneos (p. ex., coleiras inseticidas) é muito mais importante que a vacinação (Sevá *et al.* 2016, Lopes *et al.* 2018) [EC1]. As vacinas não conferem imunidade estéril; elas podem prevenir ou diminuir a intensidade dos sinais clínicos nos animais afetados, mas nem sempre previnem a infecção e, portanto, mesmo os cães vacinados podem atuar como reservatório de *Leishmania* (Regina-Silva *et al.* 2016) [EC1]. Os cães devem ser testados antes da vacinação, pois a vacinação de um cão que já está infectado não traz nenhum benefício na prevenção da infecção e é um desperdício de vacina.

### **6. Por que não temos uma vacina contra a borreliose em nosso país?**

*Borrelia* de diferentes espécies estão associadas a infecção e doenças em cães e gatos na América do Norte e Europa até a Ásia. As borrelias são transmitidas por carrapatos *Ixodes* spp. e têm como reservatórios mamíferos e aves silvestres. Para introduzir uma vacina contra *Borrelia* na América Latina seria preciso haver pesquisas robustas para verificar se o patógeno existe nessa região, se existem carrapatos vetores competentes e animais silvestres reservatórios, e se cães e gatos seriam infectados e passariam a desenvolver sinais clínicos da doença. No Brasil, estudos identificaram borreliose em pacientes humanos com doença de Lyme símile brasileira ou síndrome de Baggio-Yoshinari (Yoshinari *et al.* 2003, Mantovani *et al.* 2012), e *Borrelia burgdorferi* sensu lato em humanos assintomáticos (Gonçalves *et al.* 2015) e carrapatos do gênero *Dermacentor* (Gonçalves *et al.* 2013) [EC1]. Poucos relatos estão relacionados a animais de estimação e embora os anticorpos contra *Borrelia* tenham sido encontrados em cães, ao que sabemos o patógeno não foi isolado de cães doentes (Spolidorio *et al.* 2010, Nascimento *et al.* 2016) [EC1]. Assim, não há atualmente nenhuma base que justifique a introdução de uma vacina contra *Borrelia* para animais de estimação na região.

### **7. Certas vacinas essenciais podem quebrar a barreira da imunidade materna mais cedo que outras e, portanto, estabelecer proteção nos filhotes?**

As modernas vacinas internacionais de qualidade garantida com altos títulos são as mais propensas a fazer isto, razão pela qual o VGG recomenda o uso de tais produtos. Onde disponíveis, o uso de vacinas combinadas com altos títulos de CDV e CPV2 designadas para filhotes jovens é também recomendado quando a vacinação essencial é iniciada antes de 8 semanas de idade (vide as Tabelas 4 e 5). No entanto, não há garantia de que todo filhote terá uma resposta imune ativa rápida a cada antígeno da vacina e, portanto, as diretrizes globais da WSAVA devem ser seguidas: administrando a dose de vacina essencial final dos primeiros anos de vida às 16 semanas de idade ou mais seguida de mais uma dose de vacina entre 6 e 12 meses de idade.

**8. O VGG recomenda o uso de vacinas essenciais não mais frequentemente que a cada 3 anos, mas as vacinas essenciais em meu país são licenciadas para serem administradas anualmente. Como eu posso administrar um produto com duração da imunidade licenciada de 1 ano a cada 3 anos?**

Esta situação foi enfrentada pelos veterinários globalmente nas últimas duas décadas quando as recomendações das diretrizes passaram a ser para revacinação essencial em adultos não mais frequentemente que a cada 3 anos, mas todos os produtos tinham uma duração da imunidade de 1 ano. Naquela época, os veterinários puderam usar os produtos disponíveis de acordo com as diretrizes simplesmente obtendo o consentimento informado do cliente (e documentando isto na ficha médica) para o uso “fora da indicação” do produto. Nunca houve nenhuma ação legal contra um veterinário por fazer isto, nem exemplos de cães que contraíram infecção devido à extensão dos intervalos de vacinação. Subsequentemente, em vários mercados globalmente, as mesmas vacinas essenciais passaram a ser licenciadas com uma DI de 3 anos. Até que este novo licenciamento ocorra na América Latina, os veterinários podem adotar a mesma estratégia que foi usada com muito sucesso durante os últimos 20 a 25 anos na América do Norte, Europa e outras regiões.

**9. As atuais vacinas contra CPV fornecem proteção contra todos os tipos circulantes de CPV?**

Durante as décadas desde a primeira identificação do CPV2 em 1978, novos biotipos do vírus (CPV2a, CPV2b e CPV2c) emergiram em várias partes do mundo, incluindo a América Latina. Estas variantes do vírus são caracterizadas por alterações sutis na sequência de aminoácidos na proteína VP2. A maioria das vacinas contém ou CPV2 ou CPV2b, tendo sido levantadas dúvidas sobre elas conferirem proteção cruzada adequada contra as novas variantes do vírus (especificamente o CPV2c). Existem numerosos estudos que mostram que esta proteção cruzada ocorre e que todas as atuais vacinas contra CPV continuam eficazes a campo (p. ex., Spibey *et al.* 2008, Wilson *et al.* 2014) [EC1]. Ocorrem relatos ocasionais de parvovirose em cães vacinados, mas este cenário geralmente está relacionado a não vacinar de acordo com as recomendações das diretrizes, ou à vacinação de filhotes que já estejam incubando o vírus.

**10. Temos boas evidências referentes a quais sorovares de *Leptospira* circulam na América Latina, nas quais basear decisões sobre que tipo de vacina contra leptospirose usar na prática?**

Embora não haja dúvida de que a leptospirose ocorre em cães na América Latina, existe mínima evidência científica de alta qualidade sobre a distribuição geográfica, os sorovares causadores e as manifestações clínicas da doença. O principal ponto fraco de vários estudos publicados é que o padrão ouro para confirmar o diagnóstico clínico (isto é, sorologia pareada com 2 semanas de intervalo pelo teste de aglutinação microscópica [MAT]) e a identificação do sorovar infectante (isolamento do organismo) não foi usada. Os estudos disponíveis sugerem que os sorovares dominantes circulando a campo na América Latina podem ainda ser os sorovares Canicola e Copenhageni de *L. interrogans* [EC1] e que, conseqüentemente, as vacinas “L2” caninas tradicionais contendo esses organismos pode conferir proteção adequada. Na América do Norte e Europa, as vacinas “L3” e “L4” têm sido comercializadas para ajudar a proteger contra uma maior diversidade de sorovares causadores da doença naquelas regiões. No momento, não há evidências suficientes para que se formule uma vacina específica para a América Latina, ou que se recomende a adoção dos produtos L4 norte-americanos baseado em evidências científicas.

**11. As vacinas contra a leptospirose não deveriam ser essenciais já que temos uma alta prevalência de casos em animais e pessoas em meu país?**

Onde houver evidência científica sólida (vide a pergunta 10) de que a leptospirose é um problema clínico significativo, então faz perfeitamente sentido vacinar rotineiramente os cães sob risco, para prevenir uma doença infecciosa séria e potencialmente zoonótica. No entanto, simplesmente não é possível para o VGG classificar as vacinas contra *Leptospira* como essenciais em nossas diretrizes globais, pois existem partes do mundo nas quais a infecção não existe ou é de prevalência muito baixa. Além disso, o estilo de vida de alguns cães realmente os coloca em risco mais baixo de adquirir a infecção. Por esse motivo, o VGG fomenta o uso de vacinas não essenciais baseado em dados de vigilância de doenças na região, juntamente com um histórico de estilo de vida do animal. Os veterinários da América Latina devem fazer o seu melhor para obter dados locais confiáveis sobre a infecção por *Leptospira* para ajudar a tomar uma decisão sobre o uso dessa vacina.

**12. Quais são os fatores de risco para a exposição à *Leptospira* spp.?**

A decisão sobre usar ou não as vacinas não essenciais contra *Leptospira* seria facilitada por dados de vigilância robustos indicando se a *Leptospira* é prevalente na sua área geográfica e quais sorovares estão circulando a campo. Infelizmente, tais dados não estão disponíveis na maior parte do mundo. Conseqüentemente, a decisão de vacinar precisa ser tomada com base no estilo de vida do cão. Os cães que residem em apartamentos com acesso limitado e controlado às áreas externas podem não precisar de vacinação contra *Leptospira*. No entanto, cães com acesso externo e particularmente aqueles com acesso a água, que pode estar contaminada através da exposição a roedores, ou a animais de rebanho devem ser vacinados. Mesmo cães mantidos em um quintal podem apresentar risco se pequenos animais silvestres (por exemplo, roedores) puderem também ter acesso ao quintal.

**13. A prevalência do FeLV aparenta ser relativamente alta em algumas partes da América Latina, em comparação com os EUA e partes da Europa. O que podemos aprender com a experiência nestas regiões que possa ajudar-nos a reduzir a prevalência do FeLV aqui?**

A prevalência do FeLV era muito maior na Europa 30 a 40 anos atrás do que é hoje. Acredita-se que a combinação de (1) testes diagnósticos para o FeLV (que se tornaram consideravelmente mais convenientes e precisos ao longo dessas décadas), (2) manejo adequado dos gatos diagnosticados como infectados e (3) vacinação extensiva contra o FeLV,

levaram, em conjunto, à substancial diminuição da prevalência do FeLV em alguns países (Studer *et al.* 2019) [EC1]. O primeiro passo nas regiões da América Latina onde o FeLV não foi bem estudado seria determinar a prevalência local do FeLV. Se os testes forem considerados impraticáveis ou muito caros, então pode ser útil lembrar que a alta prevalência de linfoma multicêntrico felino, linfoma mediastinal cranial e anemia não regenerativa severa são fortes indícios de que o FeLV pode ser prevalente na área. Nas regiões onde se sabe que muitos gatos serão infectados a cada ano, instruir o cliente e vacinação ampla devem ser praticados. Idealmente, os gatos devem ser testados antes da primeira vacinação, pois não há nenhum benefício em vacinar um gato que já esteja infectado quando aquela dose de vacina pode beneficiar outro animal.

#### **14. Como decido se uso vacinação não essencial contra FeLV em minha clínica?**

Esta decisão deve ser baseada em uma análise do risco-benefício. Se, com base em boa informação, o FeLV é sabidamente ou altamente suspeito de ser prevalente na cidade ou região onde você trabalha, o uso da vacina não essencial contra FeLV pode ser justificado. Por exemplo, se houver uma alta prevalência de doenças fortemente associadas ao FeLV, tal como o linfoma mediastinal cranial ou multicêntrico, pressionar os donos para permitir testes e realizar a vacinação contra o FeLV (além de usar as vacinas essenciais) é justificado.

#### **15. Devo escolher vacinas essenciais inativadas ou vivas modificadas para gatos?**

Cada uma tem suas vantagens e desvantagens. Se for julgado necessário vacinar uma gata prenhe ou um gato imunodeprimido (por exemplo, um gato com infecção por retrovírus), uma vacina inativada é considerada mais segura de acordo com os princípios básicos (embora a evidência disto seja limitada e estudos recentes sugiram que este não seja o caso; Bergmann *et al.* 2018) [EC1]. Da mesma forma, em um local com múltiplos gatos sem história de infecção do trato respiratório superior, o uso de um produto inativado (de acordo com os princípios básicos) reduziria o risco de transferência do vírus da vacina viva. Em alguns países, as vacinas inativadas são usadas em mais gatos que as vacinas contendo VVM. Em muitos outros países, as vacinas contendo VVM para felinos são usadas em muito mais gatos do que as vacinas inativadas. Embora seja considerado incerto e controverso por alguns especialistas, há evidências de que o adjuvante (presente nas vacinas inativadas e de subunidades, mas geralmente não nas vacinas contendo VVM) parece estar associado ao desenvolvimento do sarcoma no local da injeção em felinos (FISS - do inglês: feline injection site sarcoma) (AbdelMageed *et al.* 2018, Kass 2018) [EC1]. Essa seria uma importante desvantagem das vacinas com adjuvante. Há alguma evidência limitada de que as vacinas inativadas contra FHV1 fornecem início da proteção mais rápido do que as vacinas contendo VVM contra FHV1 (Lappin 2012) [EC1]. Finalmente, onde a raiva canina for uma doença endêmica e os gatos devem receber vacinação antirrábica como essencial, o uso de vacina inativada com adjuvante é a única opção, a menos que haja acesso a um produto recombinante.

#### **16. O VGG recomenda vacinas recombinantes para cães e gatos?**

O VGG não faz recomendações sobre marcas de vacinas comerciais específicas ou sobre classes de vacinas em geral. Em algumas partes do mundo existem vacinas de vetores virais recombinantes disponíveis para proteger contra CDV, FeLV e raiva. Em algumas circunstâncias essas realmente apresentam vantagens, por exemplo para uso em espécies silvestres e como meio de evitar o uso de vacina antirrábica com adjuvante em gatos, pois estas são um dos produtos injetáveis possíveis (entre muitas vacinas e outros medicamentos injetáveis) que foram associados ao FISS (vide as Perguntas 15, 67 e 68). Até onde sabemos, tais produtos monovalentes não estão disponíveis na América Latina.

#### **17. Em quais países a vacinação antirrábica é realizada somente a cada 3 anos? Há evidência científica por trás desta prática?**

As vacinas antirrábicas são rotineiramente administradas em animais de estimação que visitam o veterinário somente a cada 3 anos na América do Norte e Europa. Nessas regiões, a exigência legal é a revacinação trienal de cães e gatos adultos. As vacinas antirrábicas internacionais de qualidade garantida usadas nessas regiões têm todas uma DI licenciada de 3 anos. A licença é baseada em evidência científica sólida e estudos para licenciamento (p. ex., Lakshmanan *et al.* 2006) [EC1]; sem tal evidência as leis não teriam sido modificadas para permitir a revacinação a cada 3 anos. Infelizmente, vacinas antirrábicas idênticas, usados na Ásia, África e América Latina, são administrados anualmente. Isto ocorre porque as leis regionais ou nacionais não foram modificadas e a indústria não foi capaz de licenciar os produtos com uma DI de 3 anos, como ocorreu na América do Norte e Europa. Na América Latina, você ainda é obrigado por lei a administrar vacinas antirrábicas anualmente; no entanto, os veterinários deveriam estar pressionando os órgãos competentes para a alteração nas leis para que as vacinas fossem licenciadas para 3 anos. Deve-se também observar que isso só se aplica aos animais que visitam o veterinário para vacinação. No contexto das campanhas de vacinação em massa a campo (que podem ser conduzidas pelas autoridades governamentais ou organizações não governamentais), as vacinas antirrábicas ainda devem ser administradas anualmente ao maior número possível de cães (incluindo os cães de rua). Essa conduta se deve ao fato de que há uma grande rotatividade entre cães de rua e a revacinação anual é necessária para manter níveis de imunidade de rebanho da ordem de 70% [EC1].

#### **18. Há alguma relação entre o peso corporal e a quantidade de antígenos de uma vacina? Os cães menores deveriam receber um volume menor de vacina do que os animais maiores?**

Esta é uma pergunta frequente em todo o mundo. As vacinas são diferentes dos medicamentos farmacológicos e não são administradas com base em mg/kg. As vacinas contêm uma quantidade definida de antígeno, que é a quantidade necessária para estimular uma resposta imune primária ou secundária em um animal. Cada pessoa e animal tem um “repertório imunológico” de linfócitos T e B antígeno-específicos definidos pelos receptores das células T e células B (TCRs e BCRs). A “teoria da seleção clonal” de Burnet propôs que cada célula T e B carregava especificidade para um único receptor, mas

sabemos agora que qualquer receptor é capaz de reconhecer múltiplos epítomos (“degeneração” dos TCRs e reatividade cruzada dos BCRs). Qualquer vacina deve, portanto, conter epítomos antigênicos capazes de serem processados e apresentados aos TCRs, ou reconhecidos em sua conformação pelos BCRs, e o objetivo da vacina é simplesmente ser reconhecida pelos linfócitos antígeno-específicos relevantes de modo que essas células sejam estimuladas a gerar imunidade ativa e memória imunológica. Portanto, o tamanho do animal é irrelevante; a vacina simplesmente precisa ser capaz de ativar as células corretas no repertório imunológico. As vacinas são formuladas com uma quantidade de antígenos para atingir esse objetivo. Dito isso, há alguma evidência de que os cães com baixo peso corporal tendem mesmo a produzir respostas sorológicas mais altas a alguns antígenos (Kennedy *et al.* 2007) e têm realmente maior incidência de eventos adversos pós vacinais do que os cães maiores (Moore *et al.* 2005) [EC1]. Entretanto, nesse momento, não há nenhuma indicação de que as vacinas passem a ser formuladas com base no peso corporal. Na América do Norte algumas vacinas estão disponíveis em volumes de 0,5 mL ao invés de 1,0 mL, mas o conteúdo antigênico desses produtos é similar. Nunca se deve fracionar a dose de uma vacina entre animais ou administrar menos do que a dose total de vacina a um animal. Esse é uso “fora da indicação” do produto e você será responsável se o animal desenvolver subsequentemente uma infecção após a vacinação.

#### **19. O VGG considera as vacinas terapêuticas tal como a vacina contra melanoma canino?**

No século 21 a vacinação não é mais simplesmente uma questão de induzir proteção contra uma doença infecciosa. As “vacinas” terapêuticas são usadas para estimular ou modular a resposta imune no câncer (p. ex., o uso da vacina contra melanoma canino) ou na alergia (o uso de imunoterapia alérgeno-específica na dermatite atópica) e na medicina humana existem muitas pesquisas a respeito das vacinas terapêuticas para doenças autoimunes. O VGG não considera esses usos alternativos para a vacinação, que são geralmente do domínio dos especialistas veterinários. Nosso foco está sempre nas vacinas disponíveis globalmente para prevenção de doenças infecciosas em cães e gatos, e nos produtos que são usados amplamente na clínica veterinária.

#### **20. O que o VGG pensa sobre a vacina contra *Microsporium canis* que está atualmente sendo usada para cães e gatos em algumas partes da América Latina?**

O VGG não recomenda o uso de uma vacina para prevenir dermatofitose em cães e gatos, uma vez que existem pouquíssimos estudos de eficácia publicados. Embora existam relatos de sucesso das vacinas anti-dermatófitos em gado e animais utilizados para a produção de casacos de pele, a resposta não parece ser a mesma em gatos, pois estas vacinas não protegem contra infecção provocada por desafio (Deboer & Moriello 1994, Deboer *et al.* 2002, Frymus *et al.* 2013) [EC1]. Uma vacina comercial consistindo em *M. canis* inativado foi licenciada nos EUA para o tratamento de gatos; no entanto, essa vacina não forneceu uma cura mais rápida de uma infecção já estabelecida em gatos vacinados comparados a controles não vacinados. O produto foi retirado do mercado (Frymus *et al.* 2013) [EC1].

### **Perguntas sobre a administração da vacina**

#### **21. Posso realizar uma vacinação essencial a cães de 4 semanas de idade se eles serão vendidos com 6 semanas?**

A primeira coisa a dizer sobre esta prática é que 6 semanas de idade é realmente muito cedo para os filhotes serem desmamados, afastados de sua mãe e vendidos. Na Europa agora é ilegal vender filhotes com menos de 8 semanas de idade. O veterinário da América Latina deve assumir o controle desta questão de bem-estar e instruir os criadores de cães quanto à época apropriada para o desmame. Reunir ninhadas de filhotes com 4 a 6 semanas de idade nas “feiras de filhotes” de fim de semana é também uma “receita para o desastre” em termos de transmissão de doenças infecciosas, e deve fazer parte da profissão médico veterinária a abordagem dessa questão de bem-estar. Se a cadela que gerou a ninhada foi adequadamente vacinada, é provável que ela tenha uma alta concentração de anticorpos séricos contra os antígenos essenciais (CDV, CAV e CPV2) e que esses sejam transferidos para os filhotes no colostro. Em tal situação, é improvável que um filhote de 4 ou 6 semanas vá responder à vacinação essencial, embora as chances de que isso ocorra sejam maiores se forem administradas vacinas contra CDV e CPV2 com altos títulos, designadas para uso em filhotes jovens. Contudo, na América Latina, talvez seja mais provável que a cadela não tenha sido adequadamente vacinada, sendo correto, portanto, tentar fornecer proteção aos filhotes o mais cedo possível. O modo mais apropriado de fazer isso, seria com uma vacina contendo CDV e CPV2 designada para uso em filhotes jovens conforme descrito acima. Tal produto poderia ser administrado a partir de 4 semanas de idade; no entanto, as vacinas contendo vírus vivo modificado NUNCA devem ser administradas antes disso, pois elas podem produzir uma infecção e malformação em neonatos. Após 6 semanas de idade, os filhotes podem ser vacinados a cada 2 a 4 semanas (trocando para uma vacina trivalente contendo CDV, CAV e CPV2 às 8 semanas de idade). A dose mais importante da vacina essencial é realmente aquela administrada às 16 semanas de idade ou mais, quando todos os filhotes já devem ter perdido os anticorpos maternos, sendo capazes de responder à vacina. Essa deve ser seguida por uma quarta vacinação essencial, administrada entre 26 e 52 semanas de idade (idealmente na extremidade mais inicial dessa faixa).

#### **22. Se os cães ou gatos filhotes sabidamente não ingeriram colostro, quando posso vaciná-los?**

É difícil estar absolutamente certo de que uma ninhada de cães ou gatos não mamou colostro; ou que certos indivíduos dentro da ninhada não mamaram colostro. No entanto, se houver suspeita disso, o primeiro conselho seria que essa ninhada fosse criada da melhor maneira, fornecendo um ambiente tão limpo e isolado quanto possível. O uso de “colostro artificial” formulado a partir de um substituto de leite associado a soro ou plasma de um animal adulto adequadamente vacinado pode também ser considerado nas primeiras 24 horas de vida. Sabe-se experimentalmente que os animais privados de colostro são capazes de produzir uma resposta imune às vacinas essenciais logo no início da vida (Chappuis 1998) [EC1];

no entanto, as vacinas contendo VVM nunca devem ser utilizadas antes das 4 semanas de idade, pois elas podem induzir infecção ou defeitos no desenvolvimento do neonato. A vacinação essencial nessa situação pode ser iniciada às 4 semanas de idade. Embora teoricamente um animal privado de colostro deva ser capaz de responder a uma única vacina essencial canina ou a uma única dose de vacina contra FPV (pois não há inibição pelos anticorpos maternos), seria sensato prosseguir com o protocolo recomendado pela WSAVA para cães ou gatos filhotes. Mesmo em um gato filhote privado de colostro, seriam recomendadas pelo menos duas doses de vacina contra FHV1 e FCV. Com 4 semanas de idade, seria recomendado o uso de vacina essencial contra CDV e CPV2 designada para cães filhotes jovens.

### **23. Quantas doses de vacinas essenciais devo administrar a um cão filhote?**

Isto depende das circunstâncias e da idade em que o filhote é levado pela primeira vez para a vacinação essencial. O ideal é que a vacinação inicial seja realizada enquanto os filhotes ainda estiverem com a cadela e deve ser planejada pelo criador. Na Europa, por exemplo, onde os filhotes não podem ser vendidos antes de 8 semanas de idade e onde as cadelas são provavelmente bem vacinadas, o criador pode planejar a vacinação essencial entre 8 e 9 semanas de idade e então a responsabilidade pelas vacinas subsequentes passa para o novo dono. Na América Latina, onde um filhote pode ser obtido muito mais cedo, a vacinação essencial pode começar mais cedo, com apenas 4 a 6 semanas de idade (vide as recomendações acima). De acordo com as diretrizes da WSAVA, os filhotes podem receber as vacinas essenciais a cada 2 a 4 semanas, com a dose de vacina essencial final dos primeiros anos de vida sendo administrada às 16 semanas de idade ou mais. Portanto, o número real de vacinas essenciais dependerá da idade do início e da frequência da administração. Um protocolo “padrão” na América do Norte ou Europa pode envolver a vacinação essencial às 8, 12 e 16 semanas de idade com uma quarta vacina essencial às 26 semanas de idade. Na América Latina, esse protocolo poderá ser adaptado levando-se em conta um início mais cedo da vacinação essencial.

### **24. Podemos usar testes sorológicos para determinar quando vacinar um filhote, ao invés de dar múltiplas doses de vacina?**

Existem kits de teste sorológicos rápidos disponíveis no mercado para serem realizados na própria clínica, que podem detectar a presença de anticorpos séricos contra CDV, CAV e CPV2. No entanto, eles são designados para tomar uma decisão sobre a revacinação de cães adultos e não para determinar o momento ideal para a vacinação dos filhotes. Simplesmente não é prático (e tem implicações para o bem-estar do animal) coletar amostras de sangue repetidamente de filhotes muito jovens e, mais importante, até as 16 semanas de idade não é possível discriminar entre o anticorpo materno e o anticorpo produzido endogenamente pelo próprio sistema imunológico do filhote em resposta à vacinação. Assim, a resposta para a pergunta é “não”, não é possível usar estes kits para determinar o momento ideal para a vacinação do filhote. No entanto, os kits poderiam ser usados para determinar a necessidade de uma vacina essencial dada entre 26 e 52 semanas de idade (de acordo com as diretrizes da WSAVA). Se um filhote for testado às 20 semanas de idade (isto é, 4 semanas após receber a última vacina essencial às 16 semanas ou mais de idade) e for soropositivo (para CDV, CAV e CPV2), então estes anticorpos devem refletir a resposta imune do próprio filhote e indicam que a proteção imunológica foi induzida. Nessa circunstância, o filhote não teria necessidade de receber outra vacina às 26 a 52 semanas de idade e poderia ir direto para o esquema de revacinação de adulto.

### **25. Algumas raças de cães transferem mais anticorpos maternos para os filhotes do que outras?**

Não há nenhuma evidência de que a transferência de anticorpos maternos esteja associada à raça ou relacionada ao tamanho do corpo. A transferência depende de fatores tais como a própria cadela ser uma “boa mãe” e ser capaz de amamentar todos os filhotes no intervalo crucial das primeiras 24 horas de vida (embora alguns estudos sugiram que o “fechamento do intestino” para a absorção dos anticorpos maternos ocorra ainda mais cedo do que isto). No entanto, o nível de anticorpos maternos pode variar entre as diferentes cadelas dependendo de quão adequadamente elas foram vacinadas. As concentrações de anticorpos maternos podem também variar para os três principais antígenos vacinais (CDV, CAV e CPV2) em qualquer cadela. Existem, no entanto, algumas raças de cães (por exemplo, rottweilers, dobermans) que podem apresentar indivíduos geneticamente “pouco responsivos” ou “não responsivos” a antígenos vacinais individuais (Day *et al.* 2016). É bem reconhecido na América do Norte e na Europa que certos rottweilers são mais suscetíveis à infecção pelo CPV2 (Houston *et al.* 1996), o que parece refletir respostas imunes vacinais inadequadas; no entanto, em um estudo, os cães dessa raça responderam adequadamente à vacinação (Coyne 2000). Os rottweilers também produzem menor resposta sorológica à vacina antirrábica (Kennedy *et al.* 2007) [EC1]. Os testes sorológicos poderiam também ser usados para identificar animais não responsivos e idealmente eles não seriam utilizados para fins de reprodução, pois não seriam capazes de transferir anticorpos maternos adequados a nenhum filhote.

### **26. Todos os filhotes de uma ninhada recebem a mesma quantidade de anticorpos maternos?**

Em um mundo ideal, este seria o caso, mas está claro que dentro de uma ninhada grande os filhotes devem proativamente encontrar uma teta para ingerir uma quantidade adequada de colostro dentro das primeiras 24 horas de vida. Filhotes menores ou mais fracos dentro de uma ninhada podem não ser capazes de conseguir isso e terão, portanto, ingerido menos anticorpos maternos. Esses animais serão protegidos de infecção por um período de tempo menor durante o início da vida, mas, em contraste, devem ser capazes de produzir uma resposta imune endógena às vacinas essenciais mais cedo do que seus irmãos da ninhada que mamaram com mais sucesso e adquiriram um volume maior de colostro.

### **27. Os filhotes nascidos de uma mãe que é revacinada anualmente com vacinas essenciais recebem mais anticorpos maternos do que os filhotes nascidos de uma mãe que é revacinada a cada 3 anos?**

Não há nenhuma evidência de que isto ocorra. Sabe-se que os cães adultos que recebem revacinação essencial trienal têm títulos de anticorpos protetores estáveis durante cada ciclo de revacinação de 3 anos e dados experimentais mostraram que os filhotes adequadamente vacinados no início da vida (e então nunca mais quando adultos) mantêm um platô de títulos de anticorpos protetores contra CDV, CAV e CPV2 (Schultz 2006) [EC1]. Existe uma abundância de dados sorológicos que mostram que a revacinação essencial anual de cães adultos é desnecessária e que os títulos de anticorpos protetores são mantidos de modo perfeitamente adequados com revacinação essencial trienal (ou mais espaçada) (Abdelmagid et al. 2004, Bohm et al. 2004, Mouzin et al. 2004, Gore et al. 2005, Schultz 2006, Larson & Schultz 2007, Mitchell et al. 2012, Killey et al. 2018) [EC1]. Alguns veterinários gostam de vacinar as cadelas reprodutoras imediatamente antes de elas acasalarem, mas não há nenhuma evidência de que isto proporcione anticorpos maternos de melhor qualidade do que nas cadelas que recebem um protocolo de revacinação essencial trienal padrão.

### **28. Como podemos socializar os filhotes com segurança se eles são potencialmente suscetíveis a infecção (por estarem na “janela de suscetibilidade”) no momento ideal para socialização?**

O período para socializar efetivamente os filhotes coincide com a “janela de suscetibilidade” para doenças infecciosas (isto é, o curto período em que os filhotes não têm mais anticorpos maternos suficientes para conferir proteção total contra infecção, mas ainda têm anticorpos maternos suficientes para bloquear a habilidade de as vacinas essenciais contendo VVM induzirem uma resposta imune endógena) (Cutler et al. 2017) [EC1]. Existe, portanto, um risco teórico de que engajar os filhotes na atividade de socialização (p. ex., participar de aulas de adestramento para filhotes, expor o filhote ao ar livre) pode permitir que eles adquiram doenças infecciosas. Este é um dilema para o veterinário; no entanto, devemos incentivar a socialização, pois as questões comportamentais são um fator importante no abandono de cães de estimação mais tarde. Existem certas medidas práticas que podem ser tomadas para minimizar o risco: (1) manter as aulas de adestramento para filhotes em ambientes relativamente limpos, (2) assegurar que todos os participantes filhotes e adultos sejam vacinados e (3) assegurar que o filhote receba a série completa de vacinação essencial recomendada pela WSAVA. Um estudo dos EUA monitorou filhotes que participavam de aulas de adestramento para filhotes e não registrou nem uma única incidência de infecção (Stepita et al. 2013) [EC1]; portanto, com bom senso os riscos são pequenos.

### **29. Quanto tempo após a última vacinação é preciso aguardar para poder passear com um filhote na rua?**

O pior cenário pode ser que o filhote tenha anticorpos maternos bloqueadores que impeçam a geração de uma resposta imune endógena à vacina essencial até a vacinação dada às 16 semanas de idade ou mais. Dentro de alguns dias após a vacinação essencial o filhote terá gerado alguma imunidade, com títulos de anticorpos séricos máximos provavelmente sendo atingidos ao redor de 2 semanas após a vacinação. Obviamente, muitos filhotes responderão com menos idade à vacinação essencial e, na América Latina, onde o processo de vacinação essencial pode começar ainda mais cedo, pode-se esperar que seja conferida proteção em uma idade mais tenra. Como passear na rua faz parte do processo de socialização, a resposta coincide com a pergunta acima. O bom senso deve prevalecer e o risco de exposição deve ser minimizado durante o início da vida. Por exemplo, levar um filhote tão jovem para uma área para cães em um parque não seria recomendado.

### **30. Se a única chance de vacinar um animal for enquanto ele está sendo castrado, devemos fazê-lo?**

Não há evidência de que administrar uma vacina a um animal durante a castração deixará de produzir uma resposta imune ativa. Os agentes anestésicos por si só não são imunossupressores e o estresse e a inflamação transitórios associados ao procedimento cirúrgico não afetarão a indução da imunidade vacinal [EC4]. O único motivo para evitar a vacinação durante a castração está relacionado à possível, e bem rara, ocorrência de uma reação de hipersensibilidade tipo I associada à vacina, a qual pode potencialmente fazer com que um animal que não esteja em jejum vomite e aspire o vômito, durante a cirurgia. Isto não tem relação com a eficácia da vacina em induzir uma resposta imunoprotetora. Um estudo demonstrou que as vacinas administradas a gatos filhotes durante a castração não afetou a resposta imune às vacinas (Reese et al. 2008) [EC1].

### **31. Por que os cães filhotes de abrigos devem ser vacinados a cada 2 semanas a partir de 6 semanas até 20 semanas de idade se foi demonstrado que os filhotes podem ter anticorpos maternos persistentes até 16 semanas de idade?**

Os abrigos são geralmente ambientes de alto risco com alta densidade populacional de animais com história desconhecida de vacinação e de exposição a doenças infecciosas. No caso de filhotes que entram em um abrigo, a história de vacinação da mãe será geralmente desconhecida. Para otimizar a proteção para os filhotes em tal ambiente, o VGG recomenda este esquema de vacinação essencial onde isso puder ser financeiramente arcado pelo abrigo. O ambiente do abrigo é geralmente diferente daquele de um canil de criação e, subseqüentemente, da nova residência de um filhote.

### **32. Se um cão espirrar após a aplicação de uma vacina intranasal, é necessário reaplicar a vacina?**

Não, isso não é necessário. Esses produtos são formulados com um “excedente” de conteúdo antigênico para levar em conta a possível perda de parte do produto durante a administração. Em caso de dúvida, você deve contatar o fabricante da vacina.

### **33. Posso dar múltiplas vacinas (p. ex., vacina combinada essencial, antirrábica e contra CRIC) no mesmo dia, especialmente a cães de raças pequenas? Ou devo espaçar as vacinas ao longo de semanas?**

O sistema imune é capaz de responder (ou tolerar ativamente) a milhares de diferentes antígenos ao mesmo tempo. As superfícies muco-cutâneas do organismo estão naturalmente interagindo com números muito grandes de antígenos (p. ex.,

do microbioma, antígenos dietários, antígenos inalados) em um processo contínuo. Portanto, imunologicamente falando, a administração de múltiplos antígenos vacinais em uma só ocasião não representa nenhum problema para o sistema imune [EC4]. Para vacinas com múltiplos componentes, um requisito do licenciamento é que seja demonstrado que cada componente é capaz de induzir a uma resposta imunoprotetora. Os fabricantes também geralmente demonstram a “compatibilidade” de suas próprias linhas de produtos que são licenciados para serem co-administrados [EC2]. Por esses motivos, não há sentido imunológico em espaçar a administração da vacina ao longo de diferentes semanas. Isso requereria múltiplas visitas pelo cliente, podendo aumentar a probabilidade de as vacinações cruciais serem “perdidas” do cronograma. Um conselho prático é que quando tiverem que ser administradas múltiplas injeções diferentes (p. ex., vacina essencial com uma vacina antirrábica separada), que estas sejam aplicadas em diferentes locais subcutâneos para que diferentes linfonodos drenantes sejam envolvidos na preparação da resposta imune. Dois estudos dos EUA contrariam isso, visto que mostram que tanto para cães (particularmente de baixo peso corporal) como para gatos há uma probabilidade maior de reações adversas após a vacinação quando números elevados de antígenos são administrados de uma só vez (Moore *et al.* 2005, 2007) [EC1]. A vacinação de acordo com as diretrizes da WSAVA minimiza o número de antígenos que podem ser administrados em uma visita à clínica.

#### **34. Quanto tempo devo esperar para vacinar um cão após ele ter se recuperado de uma doença imunossupressora tal como a cinomose ou erliquiose?**

Um princípio fundamental da vacinação é que qualquer animal que estiver clinicamente enfermo não deve ser vacinado e a vacinação deve ser adiada até que o animal tenha se recuperado. Se um cão realmente se recuperou de uma infecção por CDV, então ele terá imunidade natural à reinfeção; provavelmente uma melhor imunidade do que a que poderia ser induzida por uma vacina. Consequentemente, esse cão poderia ser testado e, se soropositivo, não requereria revacinação contra CDV. No entanto, como o antígeno do CDV é geralmente misturado com outros antígenos vacinais essenciais, esse cão vai provavelmente receber revacinação essencial padrão no futuro. Se for essencial revacinar um cão recuperado de infecção por CDV, então um período de 4 semanas após a recuperação deve permitir que a função imune se recupere. A situação com a infecção por *Ehrlichia canis* é mais complexa, pois a doença pode ter estágios agudos e crônicos e os cães tratados podem ainda abrigar o agente infeccioso de modo que a doença pode voltar a ocorrer após qualquer evento estressante futuro. Novamente, se um cão foi diagnosticado e tratado apropriadamente, ele deve estar clinicamente bem por pelo menos 4 semanas antes de fazer qualquer consideração de vacinação. Em ambas as circunstâncias, fazer um exame hematológico e bioquímico sérico pode também indicar que houve uma recuperação imunológica (isto é, normalização das contagens de leucócitos e da concentração de gamaglobulinas sérica).

#### **35. Se um cão se recuperou de cinomose e for então vacinado contra cinomose, a vacina poderia induzir sinais neurológicos?**

A resposta simples é “não”. Como acima (Pergunta 34), se um cão se recuperou naturalmente da infecção por CDV, ele terá imunidade natural robusta contra reinfeção e na realidade não requer vacina contra CDV (mas irá provavelmente recebê-la como parte de uma vacina essencial contendo múltiplos antígenos). Lembre-se que os vírus nas vacinas essenciais são atenuados e, portanto, incapazes de induzir lesões teciduais e doença clínica. Existe um relato recente e alguns casos históricos de encefalite pós-vacinal por CDV em filhotes (Fairley *et al.* 2015) [EC1], mas esta é uma ocorrência muito rara.

#### **36. Um cão resgatado da rua é levado para uma casa onde há filhotes jovens ainda recebendo suas vacinações de início de vida. O cão apresenta sinais de infecção por CDV alguns dias depois de chegar ao novo lar. Os filhotes devem ser vacinados imediatamente ao invés de aguardar até seu próximo dia de vacinação programado?**

Seria sempre bom, quando possível, isolar dos filhotes um cão adulto recém introduzido (até os filhotes terem completado seu esquema de vacinação essencial). Lembrando que é impossível saber precisamente quando cada filhote passa pela “janela de suscetibilidade”, alguns filhotes podem já estar imunes e outros não no momento da introdução. Se os filhotes estiverem dentro do intervalo de 2 a 4 semanas entre as vacinas essenciais, então nesse cenário não há problema em revaciná-los mais cedo do que estava previsto pelo protocolo de vacinação, e a partir desse momento reajustar o protocolo até a vacina administrada com 16 semanas de idade ou mais. No entanto, até essa vacina de 16 semanas ou mais, não há garantia de proteção em todos os casos.

#### **37. Os cães recuperados de parvovirose ou cinomose devem ser vacinados contra essas doenças?**

Um cão que se recuperou de infecção natural pelo CDV ou CPV2 terá desenvolvido imunoproteção robusta e será soropositivo para o vírus em questão. Essa imunidade natural é realmente ainda melhor do que a imunidade que possa ser adquirida pela vacinação. Portanto, embora um cão recuperado provavelmente não requeira vacinação contra esse patógeno em particular, como as vacinas essenciais são formuladas como um produto trivalente, ele ainda precisará ser vacinado para assegurar a proteção contra os outros dois patógenos (p. ex., um cão recuperado de infecção pelo CDV ainda necessita de vacinação contra CAV e CPV2).

#### **38. Quanto tempo devo esperar após um cão ter terminado um tratamento com glicocorticóides para que seja vacinado?**

Isto depende da dose de glicocorticóides. Uma dose anti-inflamatória (p. ex., 0,5 a 1,0 mg/kg de prednisolona) não prejudicará a habilidade de o sistema imune responder à vacinação. Uma dose imunossupressora (p. ex., 2 a 4 mg/kg de prednisolona), particularmente se combinada a outros agentes imunossupressores, é utilizada para diminuir a função imune. Consequentemente, a vacinação não deve ser administrada até pelo menos 4 semanas após o glicocorticóide ter



sido gradualmente diminuído e então cessado [EC4]. O cão deve também, obviamente, estar clinicamente saudável após o término dessa terapia. Embora não haja estudos formais sobre os efeitos da terapia com glicocorticóides sobre a vacinação canina, existe um estudo sobre o efeito do tratamento com ciclosporina nas respostas imunes vacinais de felinos. Enquanto estavam sendo tratados com ciclosporina, os gatos foram capazes de produzir respostas imunoprotetoras adequadas aos antígenos vacinais que já haviam sido administrados previamente (FPV, FHV1, FCV, FeLV e raiva), mas o medicamento prejudicou a resposta imune à primovacinação com a vacina contra FIV (Roberts *et al.* 2015) [EC1].

### **39. Posso vacinar um cão que está recebendo quimioterapia? Caso contrário, quanto tempo tenho que esperar após o término da quimioterapia antes da vacinação?**

Os cães que estão recebendo potentes medicamentos quimioterápicos imunossupressores não devem ser vacinados. Esses medicamentos prejudicam a função imune atacando as células imunes de rápida divisão, além das células cancerosas alvo. Devem decorrer pelo menos 4 semanas após cessar tal terapia antes de ser aplicada qualquer vacina. O cão deve estar clinicamente recuperado e o ideal é que se realize uma avaliação hematológica e bioquímica sérica que indique uma recuperação da função imune.

### **40. É necessário revacinar um cão após completar uma série de quimioterapia?**

Embora os medicamentos quimioterápicos afetem a função imune (vide a pergunta 39), eles não neutralizam o sistema imune nem destroem os linfócitos de memória. Portanto, não há necessidade de revacinar rotineiramente os cães após completar a quimioterapia, exceto o ciclo normal de revacinação essencial ou não essencial. Um cão que terminou quimioterapia pode ser testado sorologicamente quanto à presença de anticorpos protetores contra antígenos das vacinas essenciais se houver qualquer preocupação sobre seu nível de proteção. Os pacientes humanos recebendo quimioterapia não são revacinados após o fim de seus protocolos de tratamento.

### **41. Quanto tempo devo esperar após um cão ter passado por uma cirurgia para poder ser vacinado?**

Nada no processo de cirurgia e na administração de um agente anestésico por si só interferiria na habilidade do sistema imune de responder à vacinação [EC4]. No entanto, dependendo da natureza da cirurgia, no período de recuperação pós-cirúrgico os cães podem estar clinicamente indispostos e recebendo uma variedade de tratamentos médicos. De acordo com os princípios básicos, tem sentido aguardar até que o cão esteja clinicamente saudável e tenha terminado o tratamento médico pós-operatório antes de ser revacinado.

### **42. Até que idade devo vacinar um cão idoso? Os cães idosos devem ser vacinados todo ano com vacinas essenciais porque seu sistema imune pode não funcionar tão bem como quando eles eram mais jovens?**

Para as vacinas essenciais (CDV, CAV e CPV2) há boa evidência de que a vacinação do filhote induz imunidade protetora por toda a vida sem revacinação regular quando adulto. Existem também estudos que mostram que cães geriátricos (isto é, cães com mais de 10 anos de idade) mantêm níveis protetores de anticorpos contra esses três antígenos virais essenciais e que esses níveis de anticorpos não declinam com a idade como parte do fenômeno da “imunossenescência” (HogenEsch *et al.* 2004) [EC1]. Por outro lado, sabe-se também que a administração de uma nova vacina (isto é, uma não administrada previamente) a um cão mais velho leva a uma resposta imune primária menos efetiva do que a que poderia ter sido produzida quando mais novo (Day 2010) [EC1]. Portanto, não há nenhuma evidência de que os cães geriátricos requeiram revacinação essencial mais frequente do que os adultos mais jovens; os cães geriátricos podem ser mantidos com segurança no programa de revacinação essencial trienal padrão. Em locais onde a revacinação essencial é determinada por testes sorológicos (testes de títulos), o VGG recomenda que esses podem ser realizados anualmente (ao invés de trienalmente) nos cães geriátricos; simplesmente para ter certeza de que a revacinação não é necessária [EC4].

### **43. Quantas doses de vacina um rottweiler deve receber? Eles precisam mais doses de CPV2 do que outros cães?**

Os rottweilers são uma raça bem reconhecida por possuir uma frequência acima da média de animais geneticamente pouco responsivos e não responsivos às vacinas contra CPV2 e antirrábica. Não há nenhum motivo para vacinar os rottweilers mais frequentemente do que outras raças de cão. Se eles apresentarem esse padrão genético, significa que são destituídos de habilidade imunológica para responder a um antígeno em particular (p. ex., CPV2); isso significa que não importa com qual frequência eles sejam vacinados, eles não responderão à vacinação. Essa é uma situação em que o teste sorológico é de benefício prático. Os testes serão capazes de determinar se um rottweiler é soronegativo para o CPV2 após a vacinação (note que isso não se aplica à raiva). Esse cão estaria, portanto, em risco de contrair infecção e medidas apropriadas podem ser tomadas para minimizar esse risco. Mais importante, esses cães não devem ser usados com a finalidade de reprodução.

### **44. Existem protocolos de vacinação específicos da raça para cães?**

Não há nenhuma evidência de que qualquer raça ou grupo de raças caninas necessite qualquer protocolo de vacinação específico. Tem havido discussão sobre cães de raças pequenas (vide a Pergunta 18) e se os rottweilers necessitam de um protocolo de vacinação essencial diferente devido à possibilidade de uma resposta inadequada às vacinas contra CPV2 e antirrábica, relacionada à raça (vide as Perguntas 25 e 43). Cães jovens da raça weimaraner são suscetíveis a uma síndrome complexa envolvendo osteopatia hipertrófica, infecção recorrente crônica e deficiência de IgG sérica. Existe uma hipótese de que a manifestação dessa síndrome clínica pode ser influenciada pela vacinação (Harrus *et al.* 2002) e tem havido alguma discussão sobre os protocolos de vacinação para os cães dessa raça. No entanto, em geral, não há evidências suficientes para aconselhar qualquer coisa exceto a vacinação essencial e não essencial padrão, de acordo com as recomendações das diretrizes para todas as raças de cães.

**45. Se um cão demora mais de 3 meses para receber uma vacina anual contra *Leptospira*, eu preciso administrar uma ou duas doses de vacina para restabelecer a imunidade?**

Se um cão demorou um período de até 3 meses para receber sua vacina de reforço anual contra *Leptospira*, uma única dose de “reforço” da vacina deve ser suficiente. Se a revacinação anual demorar mais de 3 meses (isto é, um intervalo de 15 meses desde a última vacina) então devem ser administradas duas doses da vacina (com intervalo de 2 a 4 semanas entre elas) para restabelecer a imunidade, e então reforços anuais dali em diante. Alguns fabricantes informam que a proteção pode se estender até 18 meses antes de uma nova série de vacinação primária ser necessária, mas o VGG adota uma visão mais cautelosa quando considera todas as vacinas de modo geral.

**46. A vacinação pode afetar a interpretação dos títulos de *Leptospira* em um cão?**

Sim, a vacinação levará à geração de uma resposta dos anticorpos após a vacinação; contudo, essa pode não persistir por muito tempo e os títulos pós-vacinais podem declinar ou até mesmo desaparecer em até 4 meses após a vacinação, muito embora o cão continue protegido por todos os 12 meses de cobertura vacinal. Embora os títulos pós-vacinação tendam a ser baixos, eles podem persistir por mais de 4 meses em altos níveis se o cão for exposto a cepas do campo. Além disso, a reatividade cruzada com sorovares não vacinais pode ocorrer (Sykes *et al.* 2010) [EC1]. Devido a isso, se estiver tentando confirmar um diagnóstico de leptospirose em um cão clinicamente enfermo, o tempo decorrido após qualquer vacinação prévia deve ser considerado. Este é um dos principais motivos pelo qual o diagnóstico clínico da leptospirose só pode ser obtido adequadamente pela avaliação do teste MAT em amostras de soro pareadas, coletadas com 2 semanas de intervalo. Os anticorpos vacinais não apresentarão uma elevação do título na segunda amostra, enquanto os anticorpos contra um sorovar potencialmente infectante devem apresentar uma elevação de 4 vezes no título de anticorpos entre a primeira e a segunda amostra. É importante destacar que os cães podem desenvolver títulos contra sorovares não incluídos nas vacinas e às vezes o maior título é contra um sorovar não incluído na vacina. Títulos positivos para sorovares não vacinais devem ser interpretados com cautela se um cão vacinado desenvolver sinais clínicos condizentes com leptospirose (Barr *et al.* 2005, Martin *et al.* 2014) [EC1].

**47. Devo usar vacinas contra *Leptospira* a cada 6 meses ou anualmente em um cão em risco?**

Um cão em alto risco de contrair leptospirose pode ser aquele que tem acesso regular a ambientes com água onde pode haver contaminação por roedores ou ambientes agropecuários com criação de animais. Mesmo cães urbanos podem, portanto, apresentar risco. Nas versões iniciais das diretrizes globais da WSAVA, o VGG fazia a recomendação de que a revacinação semestral contra a leptospirose seja considerada para cães em alto risco. Subsequentemente, nós removemos aquela recomendação pois não havia evidência científica suficiente para respaldá-la. Portanto, mesmo os cães em alto risco requerem apenas a revacinação anual contra a leptospirose.

**48. É preferível usar uma grande vacina de múltiplos antígenos em uma única injeção ou dar injeções separadas de pequenas vacinas combinadas ou de um único antígeno?**

O VGG sempre recomendaria o uso de pequenas vacinas combinadas de antígenos (p. ex., uma vacina essencial trivalente ou bivalente com vacinas não essenciais separadas) para ter flexibilidade para vacinar os animais de acordo com as diretrizes da WSAVA. Conforme descrito acima, tais linhas de produtos permitem a administração dos componentes antigênicos essenciais mínimos para aquele animal baseada na avaliação do risco de exposição de acordo com o estilo de vida. Administrar múltiplas injeções de vacinas com menos antígenos é de longe preferível a dar uma única injeção de uma vacina com múltiplos componentes contendo antígenos que não são necessários ou não são recomendados para aquele animal. Este é um dos maiores desafios na América Latina; assegurar que as linhas de produtos com poucos componentes antigênicos disponíveis em outros mercados sejam trazidas para a América Latina, para permitir que os veterinários vacinem de acordo com as diretrizes da WSAVA.

**49. Quantas doses de vacina devemos administrar em um cão ou gato adulto sem história prévia de vacinação?**

Para vacinas essenciais e vacina antirrábica, uma única dose de vacina internacional de qualidade garantida contendo VVM induzirá a uma imunidade protetora em um animal adulto. Lembre-se de que os cães e gatos adultos não têm anticorpos maternos bloqueadores como os filhotes. A única exceção a esta regra pode ser para os gatos adultos no caso de vacinas contra FHV1 e FCV, onde para ter certeza da melhor resposta, podem ser dadas duas doses (com intervalo de 2 a 4 semanas). Isto é fácil de conseguir onde houver acesso a uma vacina trivalente (FPV, FHV1 e FCV) e bivalente (FHV1 e FCV), mas na América Latina, onde somente produtos trivalentes são comercializados, isto exigiria dar uma vacina adicional (desnecessária) contra FPV. Além do mais, o teste sorológico poderia ser usado para determinar se um cão adulto realmente necessita ser vacinado contra CDV, CAV e CPV2 ou se um gato adulto necessita ser vacinado contra FPV (note que no momento em que este documento foi escrito, o teste para felinos não estava disponível na América Latina). No caso de vacinas não essenciais, todas elas necessitarão de duas doses administradas com intervalo de 2 a 4 semanas, seguidas dos reforços no intervalo recomendado.

**50. Tenho preocupação que na América Latina, onde poucos animais são vacinados e onde há uma alta prevalência de doenças infecciosas, a vacinação a cada 3 anos contra CPV e CDV seja insuficiente. Devo continuar a dar a vacinação essencial anual aos cães?**

Na América Latina é muito mais importante tentar aumentar a imunidade de rebanho do que aumentar a carga de vacinação de cada animal. Quanto mais cães e gatos forem vacinados dentro da população, mais difícil será para a doença infecciosa se disseminar dentro daquela população. Os veterinários devem entender que administrar uma vacina essencial a um animal induz imunidade protetora. Não existem graus de imunidade protetora. A presença de anticorpo contra antígenos

da vacina essencial, seja qual for o título, indica que o animal tem proteção imunológica e memória imunológica, e qualquer exposição ao patógeno resultará em uma rápida resposta imune (memória) secundária. Simplesmente não é possível tornar um animal MAIS imune aplicando vacinas mais frequentemente. Na verdade, imunologicamente falando, e de acordo com os princípios básicos, a vacinação repetida acima dos níveis recomendados pode, mais provavelmente, induzir “tolerância” imunológica (falha em responder) do que proteção imunológica [EC4]. Portanto, a revacinação essencial trienal de acordo com as diretrizes da WSAVA é perfeitamente adequada, mesmo para os cães de mais alto risco. Doses preciosas da vacina seriam melhor utilizadas para aumentar a imunidade de rebanho em vez de serem desperdiçadas em um animal já bem protegido.

**51. Meus clientes não podem enviar seu cão para um canil de hospedagem a menos que ele tenha sido vacinado contra Giardia; portanto como pode o VGG classificar a vacina contra Giardia como não recomendada?**

Aqui, o profissional veterinário precisa perguntar “quem está fazendo essa regra”? Em muitos países (incluindo na América do Norte e Europa), os proprietários leigos de canis e gatis de hospedagem criam regras baseados em que, historicamente, isso é o que eles têm sempre feito. Esses indivíduos bem-intencionados não são veterinários cientificamente treinados e geralmente não estão a par dos avanços científicos em vacinologia veterinária ao longo das últimas décadas. Deve ser responsabilidade da profissão veterinária instruir essa comunidade e auxiliá-los com o desenvolvimento de regulamentos que sejam condizentes com a ciência moderna.

**52. Se gatos adultos adquirem resistência ao FeLV, até que idade devemos revaciná-los contra o FeLV?**

De modo geral aceita-se que os gatos adultos realmente desenvolvem algum nível de resistência natural contra a infecção pelo FeLV; portanto, considera-se mais importante estabelecer uma imunidade com a vacinação dos filhotes do que dos gatos adultos [EC4]. Qualquer filhote que possa ter um estilo de vida de risco (isto é, acesso interno-externo, vivendo em um ambiente com múltiplos gatos) pode beneficiar-se da vacinação contra o FeLV, especialmente se esse filhote também viva em uma área conhecida por ter alta prevalência de infecção (vide no texto principal deste documento onde isto é conhecido na América Latina). Para os gatos adultos, o VGG atualmente recomenda a revacinação contra FeLV somente a cada 2 ou 3 anos, ao invés de anualmente. Isso deve ser continuado por toda a vida.

**53. Deve-se vacinar um gato (contra FeLV) que teste positivo para FeLV?**

Não. Os testes diagnósticos para FeLV realizados na clínica detectam o antígeno viral. Portanto, um resultado positivo real indica que o gato está atualmente infectado com o FeLV ou combatendo uma infecção recente. Alguns gatos conseguem por si só eliminar a infecção pelo FeLV. Outros ficam persistentemente ou progressivamente infectados. Portanto, o gato com teste positivo deve ser imediatamente testado novamente, utilizando-se um teste de um fabricante diferente, para descartar um resultado falso positivo. Se for obtido um segundo resultado positivo, o gato deve ser testado novamente em 4 a 6 meses. Se o gato continuar positivo 4 a 6 meses depois, é provável a existência de uma infecção progressiva. É importante destacar que testes de antígeno negativos podem ocorrer em gatos infectados sem viremia, o que significa que às vezes você pode estar vacinando um gato assintomático, mas infectado pelo FeLV. Nesse caso, a vacina não vai causar nenhum dano, mas também é improvável que possa conferir qualquer benefício para o gato.

**54. Os gatos que vivem somente dentro de casa devem ser vacinados contra FeLV?**

Os fatores de risco para infecção pelo FeLV incluem o acesso à rua e a exposição a outros gatos, quando o vírus pode ser transmitido através das secreções salivares (p. ex., lambidas, asseio mútuo, tigelas de alimentos e água compartilhados ou mordidas como parte do comportamento de disputa). Um gato que vive somente dentro de casa, que provavelmente só saia do ambiente interno para uma visita anual ao veterinário, não seria um candidato à vacinação não essencial, incluindo contra o FeLV. Certamente, considerando que a vacinação contra o FeLV é mais efetivamente utilizada em filhotes, tomar essa decisão sobre o futuro estilo de vida do gato é às vezes difícil para os donos. Se houver algum indício de que o gato possa ter acesso à rua durante sua vida futura, ou que ele vá viver com outros gatos que tenham acesso à rua, faz sentido considerar a vacinação contra FeLV no início da vida; particularmente em áreas de alta prevalência da infecção.

**55. Se um domicílio tem um gato positivo para FeLV e a família decide adotar um novo filhote, como esse filhote deve ser vacinado contra FeLV?**

De um modo ideal, um gato sabidamente infectado pelo FeLV deveria ficar dentro de casa, isolado, e os donos devem ser aconselhados a não introduzir nenhum outro gato no domicílio. No entanto, na situação descrita, se inevitável, o novo filhote deve certamente ser vacinado contra FeLV assim que possível, antes da introdução no domicílio. É necessária a vacinação padrão contra FeLV do filhote com duas doses administradas com intervalo de 2 a 4 semanas, a partir de 8 semanas de idade, e então um reforço aos 12 meses.

**56. Pode-se vacinar um animal prenhe?**

O ideal é que os animais prenhes não sejam vacinados. No caso de vacinas essenciais onde a transferência de anticorpos maternos é necessária, as fêmeas adultas vacinadas regularmente devem possuir títulos de anticorpos adequados para transferir aos filhotes, e não deve ser nem mesmo necessário revacinar imediatamente antes que a fêmea fique prenhe. A menos que indicado especificamente pelo fabricante, de que a vacinação é segura durante a gestação (e alguns produtos trazem essa afirmação), existem também riscos teóricos para o feto com relação ao uso de vacinas contendo VVM no animal prenhe. As vacinas não essenciais não devem ser administradas também durante a gestação; as vacinas não essenciais tendem a não induzir os anticorpos protetores transferidos no colostro do modo como ocorre com as vacinas essenciais.

### **57. Deve-se desinfetar a pele com álcool antes de injetar uma vacina?**

Não há absolutamente nenhuma evidência que respalde esse procedimento, muito embora ele continue sendo praticado amplamente. Há um risco de que o álcool possa inativar parte das partículas de vírus vivo modificado de uma vacina e, portanto, essa desinfecção é realmente contraindicada. Embora a pele carregue uma microflora normal, a introdução da agulha é altamente improvável de resultar em qualquer infecção subcutânea por “transporte” de organismos para o microambiente da pele. Deve-se também observar que na medicina humana, os locais de administração da vacina injetável não são mais desinfetados com álcool, de acordo com as recomendações da OMS e do CDC (p. ex., WHO Best Practices for Injections and Related Procedures Toolkit; acessível online) [EC1].

### **58. Posso administrar uma vacina retirada direto do refrigerador ou preciso aquecê-la primeiro?**

Não há nenhum problema em aquecer levemente uma dose de vacina (isto é, mantendo-a na mão) IMEDIATAMENTE antes do uso, mas isso realmente não é necessário. Um estudo sobre o sarcoma do sítio da injeção em felinos sugeriu que a administração de vacina gelada pode ser um fator de risco para o tumor (Kass *et al.* 2003) [EC1]. No entanto, as vacinas NUNCA devem ser excessivamente aquecidas ou mantidas à temperatura ambiente por mais de 1 hora. Isto se deve ao fato de que alguns dos componentes virais das vacinas contendo VVM são termo-intolerantes e a eficácia da vacina será prejudicada pelo aquecimento. As vacinas nunca devem ser reconstituídas logo de manhã cedo para uso durante todo o dia. As vacinas devem sempre ser armazenadas adequadamente (consulte a Tabela 3).

### **59. Em meu país, manter a cadeia fria é um problema. Por quanto tempo uma vacina pode ser mantida à temperatura ambiente antes de não poder mais ser aplicada a um animal?**

Para vacinas contendo VVM, mesmo 1 a 2 horas à temperatura ambiente (e a temperatura ambiente pode flutuar amplamente, dependendo da região geográfica e da estação) é suficiente para começar a inativar alguns dos componentes virais da vacina. Mais problemático para a clínica veterinária é quando pode haver um corte de energia e o refrigerador das vacinas ficar sem energia por períodos prolongados de tempo. Nesse contexto, a recomendação seria sempre contatar o fabricante das vacinas para pedir instruções. Estudos recentes sugerem que as vacinas internacionais antirrábicas inativadas podem realmente ser bastante termo-tolerantes, mas esses estudos são feitos no contexto da vacinação em massa a campo e não pela perspectiva da prática de medicina veterinária de qualidade em uma clínica veterinária (Lankester *et al.* 2016) [EC1].

### **60. Os filhotes de cão e gato devem ser vermifugados antes de receber uma vacina?**

Esta é uma crença comum perpetuada em várias partes do mundo. Virtualmente todos os filhotes de cão e gato nascem com endoparasitas e as atuais recomendações são que a vermifugação regular comece com 2 semanas de idade nos filhotes de cão e 3 semanas de idade nos filhotes de gato (p. ex., Diretrizes do ESCCAP; <https://www.esccap.org/guidelines/>), que é naturalmente mais cedo do que administração das vacinas essenciais (de 4 a 6 semanas de idade). No entanto, se um filhote de cão ou de gato é apresentado para vacinação, mas claramente porta uma carga maciça de parasitas ao ponto de estar gravemente anêmico e clinicamente enfermo, obviamente é melhor adiar a vacinação até que o animal esteja saudável. No entanto, a maioria dos filhotes de cães e gatos parasitados permanecem aparentemente saudáveis. Atualmente, não há nenhuma evidência que sugira que portar uma carga “normal” de parasitas interfira na habilidade de um filhote (de cão ou gato) responder à vacinação. Na verdade, pode ser mais importante fornecer proteção contra doença viral de risco à vida do que se preocupar com o possível efeito do parasitismo na vacinação. No entanto, imunologicamente falando, existem atualmente muitas pesquisas demonstrando que a infestação parasitária pode influenciar na natureza das respostas imunes desviando a imunidade para uma resposta T reguladora, associada à supressão imunológica, e a uma resposta das células T helper tipo 2 dominada pela imunidade humoral ao invés de imunidade celular, e isso também foi demonstrado para o cão (Junginger *et al.* 2017) [EC1]. Existem estudos experimentais em camundongos e porcos que demonstram que o endoparasitismo prejudica as respostas imunes vacinais (Urban *et al.* 2007) [EC1], mas o que falta atualmente é qualquer evidência de que a infestação endoparasitária prejudique as respostas imunes vacinais caninas ou felinas. A vermifugação é claramente uma parte importante dos cuidados de saúde preventivos para cães e gatos (e tem implicações em saúde pública), mas atualmente não existe nenhuma base para adiar a vacinação para animais suscetíveis até ser feita a vermifugação.

### **61. Nós, como veterinários, devemos ser vacinados contra raiva? Existe alguma outra doença ocupacional contra a qual devemos ser vacinados?**

Qualquer veterinário que exerça a profissão em um país onde a raiva seja endêmica, que lide com animais que podem ter sido importados de países onde a raiva seja endêmica ou que lide com animais silvestres (particularmente morcegos), deve ser rotineiramente vacinado contra a raiva de acordo com as atuais recomendações para humanos. A raiva é uma doença fatal e nenhum veterinário em risco de exposição deve ficar desprotegido. Do ponto de vista da clínica de animais de estimação, não existem outras doenças zoonóticas para as quais haja vacinação humana disponível ou recomendada.

## **Perguntas sobre eventos adversos**

### **62. Como persuadir os clientes relutantes em aceitar a vacinação para seus animais de estimação por estarem preocupados com os possíveis eventos adversos?**

Isto está relacionado ao que é atualmente conhecido como “hesitação vacinal” sendo uma preocupação crescente tanto na medicina humana como veterinária em todo o mundo. Grupos de influência ativos com forte presença na internet promovem uma cultura de medo relacionada aos possíveis eventos adversos associados à vacinação de crianças e animais

de estimaco. A tragdia na medicina humana  que com tal atividade tem sido observado um declnio na imunidade de rebanho para doenas comuns da infncia nos ltimos anos, com surtos e mortes por doenas anteriormente controladas tal como o sarampo. No h dvida de que os veterinrios so agora tambm regularmente confrontados por clientes que recusam vacinao em seus animais de estimaco.  nossa responsabilidade profissional explicar calmamente a justificativa para a vacinao, a importncia da imunidade individual e coletiva e a segurana das vacinas com prevalncia muito baixa de eventos adversos. Esse  um dos motivos pelos quais o VGG produziu um documento que acompanha as diretrizes veterinrias globais, escrito em linguagem leiga, para o dono de animal de estimaco e o criador (infelizmente somente em ingls). Essa  uma fonte de informaes  qual os clientes preocupados com as vacinas podem ser direcionados. Ao mesmo tempo o VGG est conduzindo uma pesquisa global sobre a hesitao vacinal na clnica de pequenos animais. Os resultados da pesquisa sero apresentados durante o ano de 2020.

**63. Quo comum so os eventos adversos aps a vacinao e que tipos de eventos adversos podem ser observados na prtica?**

Uma ampla variedade de eventos adversos tem sido reconhecida aps a vacinao. A maioria deles  transitria e leve (p. ex., reaes de hipersensibilidade tipo I imediatamente aps a vacinao), mas alguns podem induzir a uma doena mais severa (p. ex., anemia hemoltica imunomediada, sarcoma no stio de injeo em felinos). A "reao" mais comum  uma leve letargia, anorexia e pirexia por 2 a 3 dias aps a vacinao. Na realidade, esta no  uma reao adversa, mas mais uma indicao de que a vacina estimulou as vias imunes e inflamatrias como parte da gerao da resposta imunoprotetora.  difcil obter dados exatos sobre a frequncia de reaes adversas aps a vacinao. Revisando todas as informaes globais, podemos dizer que existe algo em torno de 30 a 50 reaes adversas (a maioria leve e transitria) para cada 10.000 vacinaes realizadas (Moore *et al.* 2005, 2007, Miyaji *et al.* 2012) [EC1]. A chance de contrair doena infecciosa de risco  vida (particularmente em ambientes como os da Amrica Latina) supera em muito o risco de eventos adversos.

**64. Se um animal apresentou uma reao alrgica aps a vacinao no passado, deve-se vacin-lo mais alguma vez?**

Teoricamente, se uma reao ocorreu devido a uma reao de hipersensibilidade tipo I mediada por IgE, o animal est imunologicamente sensibilizado e  provvel que acontea o mesmo tipo de reao em uma exposio subsequente ao mesmo antgeno. Na realidade, isso nem sempre acontece e s vezes tais reaes ocorrem apenas uma vez. Se a reao ocorreu em um filhote que ainda no recebeu a srie completa das vacinas do incio de vida, esse animal deve ser revacinado para receber o esquema completo de vacinas essenciais. Deve-se considerar se as vacinas no essenciais so justificadas para esse animal e, quando adulto, podem ser usados testes sorolgicos para informar a necessidade das vacinas essenciais. Existem certas medidas prticas que podem ser tomadas para evitar a ocorrncia de tais reaes na segunda vez ou nas aplicaes subsequentes. Trocar a marca da vacina pode ou no ter algum efeito. No h nenhum problema em dar uma dose de anti-histamnico ou uma dose anti-inflamatria de glicocorticoide imediatamente antes da vacinao; isto no ir interferir na eficcia da vacina.  melhor manter o animal na clnica e monitor-lo por vrias horas aps a vacinao, ao invs de envi-lo para casa.

**65. Se um animal apresentou uma reao alrgica aps a vacinao no passado, pode-se usar glicocorticoides antes de administrar as futuras vacinas para evitar que tais reaes ocorram novamente?**

Sim, o glicocorticoide em uma dose anti-inflamatria pode ser usado, assim como uma dose de anti-histamnico. No h garantia de que isto evite que a reao ocorra novamente, mas no deve haver interferncia na eficcia da vacina.

**66. Se um co se recuperou de uma doena imunomediada que pode ter sido desencadeada por vacinao, como devo revacin-lo no futuro?**

As doenas imunomediadas ou autoimunes so desordens multifatoriais complexas que envolvem fatores desencadeadores em um ambiente de desregulao imune, em um indivduo geneticamente suscetvel. Os fatores desencadeadores reconhecidos de doenas imunomediadas incluem infeco subjacente, neoplasia, inflamao crnica ou exposio recente a medicamentos ou vacinas. A evidncia de autoimunidade associada a vacinas nos ces  limitada e restrita s observaes clnicas de doena imunomediada iniciando de 2 a 4 semanas aps a vacinao, na ausncia de quaisquer outros possveis mecanismos desencadeadores. A desordem mais comum vinculada  vacinao  a anemia hemoltica imunomediada (AHIM) com evidncias conflitantes a uma relao com trombocitopenia imunomediada (TIM) ou poliartrite imunomediada. Dito isto, como a vacinao  em desencadeador potencial, e como as doenas imunomediadas tm um padro recidivante e recorrente, deve-se considerar cuidadosamente os protocolos de revacinao para qualquer co que tenha sido tratado com sucesso e tenha se recuperado de uma desordem imunomediada. A revacinao essencial pode ser evitada se o co for sorologicamente testado e demonstrar j possuir imunidade. As vacinas no essenciais devem ser cuidadosamente selecionadas, pesando na balana o risco de exposio  doena e o risco de recidiva da doena imunomediada. Pode no ser possvel (legalmente) evitar a vacinao antirrbica; no entanto, em alguns estados norte-americanos  possvel o veterinrio autorizar uma "iseno mdica" da revacinao antirrbica. Embora essas precaues sejam sensatas (de acordo com os princpios bsicos), dois estudos recentes realmente demonstram no ter havido nenhum efeito deletrio quando ces recuperados de AHIM ou TIM foram revacinados (Ellis *et al.* 2016b, Moon & Veir 2019) [EC1].

**67. Qual  a evidncia de que as vacinas com adjuvante so a causa do sarcoma do stio da injeo em felinos (FISS)?**

As vacinas são apenas um de uma longa lista de produtos injetáveis que têm sido associados ao FISS. Existe uma particularidade a respeito do tecido subcutâneo dos gatos (*versus* dos cães), que implica que repetidas injeções (de qualquer coisa) pode estabelecer um estado de inflamação crônica que, em algum momento, poderá se transformar em uma doença neoplásica. O gato, em geral, parece mais suscetível a desenvolver sarcomas após trauma localizado ou inflamação crônica (Morrison 2012) [EC1]. Há um debate controverso sobre a possibilidade dos adjuvantes das vacinas aumentarem a probabilidade das vacinas induzirem a essa reação. Não há dúvida de que o adjuvante induz uma reação inflamatória crônica localizada de longa duração no local da injeção (muito mais do que as vacinas sem adjuvante) (Day *et al.* 2007) [EC1], mas sugere-se que qualquer vacina seja capaz de induzir essa reação. Em termos práticos, o conselho é minimizar o uso de todas as vacinas nos gatos (isto é, vacinando de acordo com as diretrizes da WSAVA) e sempre que possível minimizar o uso de vacinas com adjuvante como precaução. Deve-se dar consideração ao local de administração das vacinas nos gatos (vide a Pergunta 68).

**68. Qual é o melhor local anatômico para vacinar um gato para reduzir o risco de sarcoma do sítio de injeção em felinos?**

Não há um local anatômico específico no qual um gato possa ser injetado que reduza o risco de desenvolvimento de sarcoma. No entanto, existem estratégias que podem ser adotadas que auxiliarão no manejo do sarcoma, caso ele ocorra. Existem várias opções diferentes recomendadas por diferentes organizações e autores. Essas incluem a administração por via subcutânea o mais distal possível nas patas traseiras e dianteiras, a administração na pele do abdômen lateral e a administração o mais distal possível na cauda. A WSAVA não recomenda uma única opção, mas sugere que no mínimo a nuca não seja utilizada e que os locais de vacinação sejam revezados a cada aplicação, e que esses locais sejam registrados na ficha médica do animal.

**69. O VGG recomenda teste sorológico de cães e gatos adultos em lugar da revacinação essencial?**

Sim, o VGG apoia o uso de testes sorológicos realizados na clínica para determinar se os cães adultos estão protegidos (isto é, se possuem anticorpos séricos) contra CDV, CAV e CVP2, e se os gatos adultos estão protegidos contra FPV (no momento em que este documento foi escrito o teste para felinos não estava disponível na América Latina). Note que a sorologia não pode prever a proteção contra FHV1 ou FCV, ou contra quaisquer antígenos das vacinas não essenciais. O teste sorológico para verificar a eficácia da vacinação antirrábica é frequentemente exigido para viagem com o animal de estimação, mas nesse caso, o teste é geralmente realizado dentro de um período definido após a vacinação (p. ex., 4 semanas) e não é usado na prática clínica para demonstrar proteção contra raiva pois os títulos podem declinar após o intervalo recomendado de teste. Deve-se selecionar um kit bem validado, respaldado por literatura científica revisada por pares. A sorologia pode ser realizada anual ou trienalmente durante a consulta de verificação anual da saúde. Muitos donos, particularmente aqueles preocupados com a segurança das vacinas (vide a Pergunta 62), preferirão esta opção para seus animais de estimação.

**70. Existem kits para avaliar os títulos de anticorpos em gatos?**

Sim, existe um fabricante que produz um kit para determinação de anticorpos anti-FPV, FHV1 e FCV no soro dos gatos (Mende *et al.* 2014), mas no momento em que este documento foi escrito esse teste não estava disponível na América Latina [EC1]. Note que somente os anticorpos anti-FPV são preditivos de proteção; os anticorpos contra os vírus do trato respiratório superior não estão correlacionados com proteção.

## Referências

- AbdelMageed, M. A., Foltopoulou, P. & McNeil, E. A. (2018) Feline vaccine-associated sarcomagenesis: is there an inflammation-independent role for aluminium? *Veterinary and Comparative Oncology* **16**, E130-E143
- Abdelmagid, O. Y., Larson, L., Payne, L., et al. (2004) Evaluation of the efficacy and duration of immunity of a canine combination vaccine against virulent parvovirus, infectious canine hepatitis virus, and distemper virus experimental challenges. *Veterinary Therapeutics* **5**, 173-186
- Acosta-Jamett, G., Chalmers, W. S. K., Cunningham, A. A., et al. (2011) Urban domestic dog populations as a source of canine distemper virus for wild carnivores in the Coquimbo region of Chile. *Veterinary Microbiology* **152**, 247-257
- Acosta-Jamett, G., Surot, D., Corte's, M., et al. (2015) Epidemiology of canine distemper and canine parvovirus in domestic dogs in urban and rural areas of the Araucania region in Chile. *Veterinary Microbiology* **178**, 260-264
- Aldaz, J., García-Díaz, J., Calleros, L., et al. (2013) High local genetic diversity of canine parvovirus from Ecuador. *Veterinary Microbiology* **166**, 214-219
- Almeida, N. R., Danelli, M. G. M., Silva, L. H. P., et al. (2012) Prevalence of feline leukemia virus infection in domestic cats in Rio de Janeiro. *Journal of Feline Medicine and Surgery* **14**, 583-586
- Alves, C. D. B. T., Granados, O. F. O., Budaszewski, R. D. F., et al. (2018) Identification of enteric viruses circulating in a dog population with low vaccine coverage. *Brazilian Journal of Microbiology* **49**, 790-794
- Anderson, K. A., Brooks, A. S., Morrison, A. L., et al. (2004) Impact of *Giardia* vaccination on asymptomatic *Giardia* infections in dogs at a research facility. *Canadian Veterinary Journal* **45**, 924-930
- Arjona-Jiménez, G., Villegas, N., López-Céspedes, A., et al. (2012) Prevalence of antibodies against three species of *Leishmania* (*L. mexicana*, *L. braziliensis*, *L. infantum*) and possible associated factors in dogs from Mérida, Yucatán, Mexico. *Transactions of the Royal Society of Tropical Medicine and Hygiene* **106**, 252-258
- Baneth, G., Koutinas, A. F., Solano-Gallego, L., et al. (2008) Canine leishmaniosis - new concepts and insights on an expanding zoonosis: part one. *Trends in Parasitology* **24**, 324-330
- Barr, S. C., McDonough, P. L., Scipioni-Ball, R. L., et al. (2005) Serologic responses of dogs given a commercial vaccine against *Leptospira interrogans* serovar Pomona and *Leptospira kirschneri* serovar Grippotyphosa. *American Journal of Veterinary Research* **66**, 1780-1784
- Barrs, V. R. (2019) Feline panleukopenia: a re-emergent disease. *Veterinary Clinics of North America: Small Animal Practice* **49**, 651-670
- Baumworcel, N., Soares, A. M. B., Silva, S. B., et al. (2017) Correlation between clinical signs of feline conjunctivitis and molecular detection of felid herpesvirus-1, feline calicivirus, *Chlamydomydia felis* and *Mycoplasma felis* in cats from shelters in Rio de Janeiro. *Brazilian Journal of Veterinary Research and Animal Science* **54**, 18-26
- Belo, V. S., Gregório, E. A., Teixeira-Neto, R. G., et al. (2017) Reliability of techniques used in the diagnosis of canine visceral leishmaniasis by the national control program in Brazil: a survey in an area of recent transmission. *Preventive Veterinary Medicine* **146**, 10-15
- Belshaw, Z., Robinson, N. J., Brennan, M. L., et al. (2019) Developing practical recommendations for preventative healthcare consultations involving dogs and cats using a Dephi technique. *Veterinary Record* **184**, vetrec-2018-104970. <https://doi.org/10.1136/vr.104970>
- Bergmann, M., Schwertler, S., Speck, S., et al. (2018) Antibody response to feline panleukopenia virus vaccination in cats with asymptomatic retrovirus infections: a pilot study. *Journal of Feline Medicine and Surgery* **21**, 1094-1101. <https://doi.org/10.1177/1098612X18816463>
- Biezus, G., Machado, G., Ferian, P. E., et al. (2019) Prevalence of and factors associated with feline leukemia virus (FeLV) and feline immunodeficiency virus (FIV) in cats of the state of Santa Catarina, Brazil. *Comparative Immunology, Microbiology and Infectious Diseases* **63**, 17-21
- Blanco, K., Prendas, J., Cortes, R., et al. (2009) Seroprevalence of viral infections in domestic cats in Costa Rica. *Journal of Veterinary Medical Science* **71**, 661-663
- Bohm, M., Thompson, H., Weir, A., et al. (2004) Serum antibody titres to canine parvovirus, adenovirus and distemper virus in dogs in the UK which had not been vaccinated for at least three years. *Veterinary Record* **154**, 457-463
- Bongiorno, G., Paparcone, R., Manzillo, V. F., et al. (2013) Vaccination with LIESP/QA-21 (Canileish®) reduces the intensity of infection in *Phlebotomus perniciosus* fed on *Leishmania infantum* infected dogs: a preliminary xenodiagnosis study. *Veterinary Parasitology* **197**, 691-695
- Budaszewski, R. F., Pinto, L. D., Weber, M. N., et al. (2014) Genotyping of canine distemper virus strains circulating in Brazil from 2008 to 2012. *Virus Research* **180**, 76-83
- Caldas, A. P. F., Leal, E. S., Silva, E. F. A., et al. (2000) Detection of feline immunodeficiency provirus in domestic cats by polymerase chain reaction. *Pesquisa Veterinária Brasileira* **20**, 20-25
- Calderon, M. G., Remorini, P., Periolo, O., et al. (2007) Detection by RT-PCR and genetic characterization of canine distemper virus from vaccinated and non-vaccinated dogs in Argentina. *Veterinary Microbiology* **125**, 341-349
- Calderón, M. G., Romanutti, C., Wilda, M., et al. (2011) Evolution of canine parvovirus in Argentina between years 2003 and 2010: CPV2c has become the predominant variant affecting the domestic dog population. *Virus Research* **157**, 106-110
- Calderón, M. G., Romanutti, C., Wilda, M., et al. (2015) Resurgence of canine parvovirus 2a strain in the domestic dog population from Argentina. *Journal of Virological Methods* **222**, 145-149
- Castro, N. B., Rolim, V. M., Hesse, K. L., et al. (2014) Pathologic and immunohistochemical findings of domestic cats with feline panleukopenia. *Pesquisa Veterinária Brasileira* **34**, 770-775
- Caxito, F. A., Coelho, F. M., Oliveira, M. E., et al. (2006) Feline immunodeficiency virus subtype B in domestic cats in Minas Gerais, Brazil. *Veterinary Research Communications* **30**, 953-956
- Chappuis, G. (1998) Neonatal immunity and immunisation in early age: lessons from veterinary medicine. *Vaccine* **16**, 1468-1472
- Coelho, F. M., Maia, M. Q., Luppi, M. M., et al. (2011) Occurrence of feline leukemia virus in *Felis catus* in Belo Horizonte. *Arquivo Brasileiro de Medicina Veterinária e Zootecnia* **63**, 778-783
- Conceição, L. G. (2016) Veterinary dermatology in Brazil. *Veterinary Dermatology* **27**, 133-134
- Cortés, L. A. (2006) Foco de leishmaniasis en El Hobo, municipio del Carmen de Bolívar, Bolívar, Colombia. *Biomédica* **26**, 236-241
- Costa, V. G., Saivish, M. V., Rodrigues, R. L., et al. (2019) Molecular and serological surveys of canine distemper virus: a meta-analysis of cross-sectional studies. *PLoS One* **14**, e0217594
- Coyne, M. J. (2000) Efficacy of two canine parvovirus vaccines for inducing seroconversion in rottweiler and doberman pinscher pups with various levels of maternally derived antibodies. *Veterinary Therapeutics* **1**, 35-42

- Cristo, T. G., Biezus, G., Noronha, L. F., *et al.* (2019a) Feline leukaemia virus associated with leukaemia in cats in Santa Catarina, Brazil. *Journal of Comparative Pathology* **170**, 10-21
- Cristo, T. G., Biezus, G., Noronha, L. F., *et al.* (2019b) Feline lymphoma and a high correlation with feline leukaemia virus infection in Brazil. *Journal of Comparative Pathology* **166**, 20-28
- Cruz, I., Acosta, L., Gutierrez, M. N., *et al.* (2010) A canine leishmaniasis pilot survey in an emerging focus of visceral leishmaniasis: Posadas (Misiones, Argentina). *BMC Infectious Diseases* **10**, 342
- Cutler, J. H., Coe, J. B. & Niel, L. (2017) Puppy socialization practices of a sample of dog owners from across Canada and the United States. *Journal of the American Veterinary Medical Association* **251**, 1415-1423
- Damián, M., Morales, E., Salas, G., *et al.* (2005) Immunohistochemical detection of antigens of distemper, adenovirus and parainfluenza viruses in domestic dogs with pneumonia. *Journal of Comparative Pathology* **133**, 289-293
- Day, M. J. (2010) Ageing, immunosenescence and inflammageing in the dog and cat. *Journal of Comparative Pathology* **142**, S60-S90
- Day, M. J., Schoon, H.-A., Magnol, J.-P., *et al.* (2007) A kinetic study of histopathological changes in the subcutis of cats injected with non-adjuvanted and adjuvanted multi-component vaccines. *Vaccine* **25**, 4073-4084
- Day, M. J., Karkare, U., Schultz, R. D., *et al.* (2015) Recommendations on vaccination for Asian small animal practitioners: a report of the WSAVA vaccination guidelines group. *Journal of Small Animal Practice* **56**, 77-95
- Day, M. J., Horzinek, M. C., Schultz, R. D., *et al.* (2016) Guidelines for the vaccination of dogs and cats. *Journal of Small Animal Practice* **57**, E1-E45
- de Castro, C. C., Johann, J. M., Finger, P. F., *et al.* (2010) Canine coronavirus (CCoV) in dogs vaccinated and unvaccinated domiciliated in Pelotas, RS, Brazil. *Semina Ciências Agrárias Londrina* **31**, 995-1000
- De la Torre, D., Mafla, E., Puga, B., *et al.* (2018) Molecular characterization of canine parvovirus variants (CPV-2a, CPV-2b, and CPV-2c) based on the VP2 gene in affected domestic dogs in Ecuador. *Veterinary World* **11**, 480-487
- Deboer, D. J. & Moriello, K. A. (1994) The immune response to *Microsporium canis* induced by fungal cell wall vaccine. *Veterinary Dermatology* **5**, 47-55
- Deboer, D. J., Moriello, K. A., Blum, J. L., *et al.* (2002) Safety and immunologic effects after inoculation of inactivated and combined live-inactivated dermatophytosis vaccines in cats. *American Journal of Veterinary Research* **63**, 1532-1537
- Decaro, N., Pratelli, A., Tinelli, A., *et al.* (2004) Fecal immunoglobulin A antibodies in dogs infected or vaccinated with canine coronavirus. *Clinical and Diagnostic Laboratory Immunology* **11**, 102-105
- Dezengrini, R., Weiblen, R. & Flores, E. F. (2007) Seroprevalence of parvovirus, adenovirus, coronavirus and canine distemper virus infections in dogs of Santa Maria, Rio Grande do Sul, Brazil. *Ciência Rural* **37**, 183-189
- Diaz, N. M., Mendez, G. S., Grijalva, C. J., *et al.* (2016) Dog overpopulation and burden of exposure to canine distemper virus and other pathogens on Santa Cruz Island, Galapagos. *Preventive Veterinary Medicine* **123**, 128-137
- Digangi, B. A., Levy, J. K., Griffin, B., *et al.* (2012) Effects of maternally-derived antibodies on serologic responses to vaccination in kittens. *Journal of Feline Medicine and Surgery* **14**, 118-123
- DiGangi, B. A., Dingman, P. A., Grijalva, C. J., *et al.* (2019) Prevalence and risk factors for the presence of serum antibodies against canine distemper, canine parvovirus, and canine adenovirus in communities in mainland Ecuador. *Veterinary Immunology and Immunopathology* **218**, 109933
- Duque-García, Y., Echeverri-Zuluaga, M., Trejos-Suarez, J., *et al.* (2017) Prevalence and molecular epidemiology of canine parvovirus 2 in diarrheic dogs in Colombia, South America: a possible new CPV-2a is emerging? *Veterinary Microbiology* **201**, 56-61
- Ellis, J. A., Gow, S. P., Waldner, C. L., *et al.* (2016a) Comparative efficacy of intranasal and oral vaccines against *Bordetella bronchiseptica* in dogs. *Veterinary Journal* **212**, 71-77
- Ellis, J., Ward, P. M. & Foale, R. D. (2016b) Evaluation of the risk of relapse of canine immune-mediated thrombocytopenia after routine vaccination. *Journal of Veterinary Internal Medicine* **30**, 1467
- Espinal, M. A., Díaz, F. J. & Ruiz-Saenz, J. (2014) Phylogenetic evidence of a new canine distemper virus lineage among domestic dogs in Colombia, South America. *Veterinary Microbiology* **172**, 168-176
- Fairley, R. A., Knesl, O., Pesavento, P. A., *et al.* (2015) Post-vaccinal distemper encephalitis in two border collie cross littermates. *New Zealand Veterinary Journal* **53**, 117-120
- Feliciangeli, M. D., Delgado, O., Suarez, B., *et al.* (2005) The burden of the *Leishmania chagasi/infantum* infection in a closed rural focus of visceral leishmaniasis in Lara state, west-Central Venezuela. *Tropical Medicine and International Health* **10**, 444-449
- Fernandes, C. B., Magalhães Junior, J. T., de Jesus, C., *et al.* (2014) Comparison of two commercial vaccines against visceral leishmaniasis in dogs from endemic areas: IgG, and subclasses, parasitism, and parasite transmission by xenodiagnosis. *Vaccine* **5**, 1287-1295
- Fernández, J. M., Charry, T. A. C., Bello, G. F. J., *et al.* (2002) Prevalence of canine visceral leishmaniasis in municipalities of Huila, Colombia. *Revista de Salud Pública* **4**, 278-285
- Frymus, T., Gruffydd-Jones, T., Pennisi, M. G., *et al.* (2013) Dermatophytosis in cats: ABCD guidelines on prevention and management. *Journal of Feline Medicine and Surgery* **15**, 598-604
- Galdo Novo, S., Bucafusco, D., Diaz, L. M., *et al.* (2016) Viral diagnostic criteria for feline immunodeficiency virus and feline leukemia virus infections in domestic cats from Buenos Aires, Argentina. *Revista Argentina de Microbiología* **48**, 293-297
- Garcia, R. C. N. C., Castro, T. X., Miranda, S. C., *et al.* (2011) Characterization of parvoviruses from domestic cats in Brazil. *Journal of Veterinary Diagnostic Investigation* **23**, 951-955
- Gizzi, A. B., Oliveira, S. T., Leutenegger, C. M., *et al.* (2014) Presence of infectious agents and co-infections in diarrheic dogs determined with a real-time polymerase chain reaction-based panel. *BMC Veterinary Research* **10**, 23
- Gonçalves, D. D., Carreira, T., Nunes, M., *et al.* (2013) First record of *Borrelia burgdorferi* B31 strain in *Dermacentor nitens* ticks in the northern region of Parana (Brazil). *Brazilian Journal of Microbiology* **44**, 883-887
- Gonçalves, D. D., Moura, R. A., Nunes, M., *et al.* (2015) *Borrelia burgdorferi* sensu lato in humans in a rural area of Paraná State, Brazil. *Brazilian Journal of Microbiology* **46**, 571-575
- Gonsales, F. F., Brandão, P. E., Melville, P. A., *et al.* (2013) Occurrence of *Chlamydomphila felis* in a cattery in Osasco city, São Paulo state. *Brazilian Journal of Veterinary Research and Animal Science* **50**, 379-383



- González, G. M., Rosales, M. E., Morales, G. B., *et al.* (2006) Isolation and characterization of *Bordetella bronchiseptica* strains from canine origin. *Veterinaria México* **37**, 313-325
- González-Chávez, M. T., Peraza-González, B., Díaz-Rodríguez, S., *et al.* (2017) Clinical characterization of the canine distemper in two municipalities of Havana. *Revista de Salud Animal* **39**, 43-50
- Gore, T. C., Lakshmanan, N., Duncan, K. L., *et al.* (2005) Three-year duration of immunity in dogs following vaccination against canine adenovirus type-1, canine parvovirus, and canine distemper virus. *Veterinary Therapeutics* **6**, 5-14
- Gore, T. C., Lakshmanan, N., Williams, J. R., *et al.* (2006) Three-year duration of immunity in cats following vaccination against feline rhinotracheitis virus, feline calicivirus, and feline panleukopenia virus. *Veterinary Therapeutics* **7**, 213-222
- Hagiwara, M.K., Miotto, B.A., Tozzi, B.F. (2015) Revisão sobre a leptospirose canina no Brasil. *Clinica Veterinária* **114**, 86-104
- Harrus, S., Waner, T., Aizenberg, S. N., *et al.* (2002) Development of hypertrophic osteodystrophy and antibody response in a litter of vaccinated Weimaraner puppies. *Journal of Small Animal Practice* **43**, 27-31
- Hartmann, T. L. S., Batista, H. B. C. R., Dezen, D., *et al.* (2007) Neutralizing antibodies to distemper and parainfluenza viruses in dogs in shelter kennels in the municipalities of Novo Hamburgo and Porto Alegre, RS, Brazil. *Ciência Rural* **37**, 1178-1181
- Headley, S. A., Alfieri, A. A., Fritzen, J. T. T., *et al.* (2013) Concomitant canine distemper, infectious canine hepatitis, canine parvoviral enteritis, canine infectious tracheobronchitis, and toxoplasmosis in a puppy. *Journal of Veterinary Diagnostic Investigation* **25**, 129-135
- Headley, S. A., Oliveira, T. E. S., Pereira, A. H. T., *et al.* (2018) Canine morbillivirus (canine distemper virus) with concomitant canine adenovirus, canine parvovirus-2, and *Neospora caninum* in puppies: a retrospective immunohistochemical study. *Science Reports* **8**, 13477
- Headley, S. A., de Mello Zanim Michelazzo, M., Elias, B., *et al.* (2019) Disseminated melanized fungal infection due to *Cladosporium halotolerans* in a dog coinfecting with canine adenovirus-1 and canine parvovirus-2. *Brazilian Journal of Microbiology* **50**, 859-870
- Henzel, A., Brum, M. C. S., Lautert, C., *et al.* (2012) Isolation and identification of feline calicivirus and feline herpesvirus in southern Brazil. *Brazilian Journal of Microbiology* **43**, 560-568
- HogenEsch, H., Thompson, S., Dunham, A., *et al.* (2004) Effect of age on immune parameters and the immune response of dogs to vaccines: a cross-sectional study. *Veterinary Immunology and Immunopathology* **97**, 77-85
- Houston, D. M., Ribble, C. S., Head, L. L. (1996) Risk factors associated with parvovirus enteritis in dogs: 283 cases (1982-1991). *Journal of the American Veterinary Medical Association* **208**, 542-546
- Inkelmann, M. A., Rozza, D. B., Figuera, R. A., *et al.* (2007) Infectious canine hepatitis: 62 cases. *Pesquisa Veterinária Brasileira* **27**, 325-332
- Inkelmann, M. A., dos Anjos, B. L., Kommers, G. D., *et al.* (2008) Immunohistochemical aspects of canine infectious hepatitis. *Ciência Rural* **38**, 2636-2640
- Jakel, V., Cussler, K., Hanschmann, K. M., *et al.* (2012a) Maternal antibodies interfere with vaccine protection. *Tieraerztliche Umschau* **67**, 281-281
- Jakel, V., Cussler, K., Hanschmann, K. M., *et al.* (2012b) Vaccination against feline panleukopenia: implications from a field study in kittens. *BMC Veterinary Research* **8**, 62
- Jas, D., Coupier, C., Toulemonde, C. E., *et al.* (2012) Three-year duration of immunity in cats vaccinated with a canarypox-vectored recombinant rabies virus vaccine. *Vaccine* **30**, 6991-6996
- Jas, D., Frances-Duvert, V., Vernes, D., *et al.* (2015) Three-year duration of immunity for feline herpesvirus and calicivirus evaluated in a controlled vaccination-challenge laboratory trial. *Veterinary Microbiology* **177**, 123-131
- Johann, J. M., Caetano, C. F., Hass, R., *et al.* (2009) Serum survey for antibodies to coronavirus, herpesvirus, calicivirus, and parvovirus in domestic cats from Rio Grande do Sul, Brazil. *Arquivo Brasileiro de Medicina Veterinária e Zootecnia* **61**, 752-754
- Junginger, J., Raue, K., Wolf, K., *et al.* (2017) Zoonotic intestinal helminths interact with the canine immune system by modulating T cell responses and preventing dendritic cell maturation. *Scientific Reports* **7**, 10310
- Kass, P. H. (2018) Prevention of feline injection-site sarcomas: is there a scientific foundation for vaccine recommendations at this time? *Veterinary Clinics of North America: Small Animal Practice* **48**, 301-306
- Kass, P. H., Spangler, W. L., Hendrick, M. J., *et al.* (2003) Multicenter case-control study of risk factors associated with development of vaccine-associated sarcomas in cats. *Journal of the American Veterinary Medical Association* **223**, 1283-1292
- Kennedy, L. J., Lunt, M., Barnes, A., *et al.* (2007) Factors influencing the antibody response of dogs vaccinated against rabies. *Vaccine* **25**, 8500-8507
- Killely, R., Mynors, C., Pearce, R., *et al.* (2018) Long-lived immunity to canine core vaccine antigens in UK dogs as assessed by an in-practice test kit. *Journal of Small Animal Practice* **59**, 27-31
- Lacerda, L. C., Silva, A. N., Freitas, J. S., *et al.* (2017) Feline immunodeficiency virus and feline leukemia virus: frequency and associated factors in cats in northeastern Brazil. *Genetics and Molecular Research* **16**. <https://doi.org/10.4238/gmr16029633>
- Lakshmanan, N., Gore, T. C., Duncan, K. L., *et al.* (2006) Three-year rabies duration of immunity in dogs following vaccination with a core combination vaccine against canine distemper virus, canine adenovirus type-1, canine parvovirus, and rabies virus. *Veterinary Therapeutics* **7**, 223-231
- Lankester, F. J., Wouters, P. A. W. M., Czupryna, A., *et al.* (2016) Thermotolerance of an inactivated rabies vaccine for dogs. *Vaccine* **34**, 5504-5511
- Lappin, M. R. (2012) Feline panleukopenia virus, feline herpesvirus-1 and feline calicivirus antibody responses in seronegative specific pathogen-free kittens after parenteral administration of an inactivated FVRCP vaccine or a modified live FVRCP vaccine. *Journal of Feline Medicine and Surgery* **14**, 161-164
- Lara, V. M., Taniwaki, S. A. & Araujo Junior, J. P. (2008) Occurrence of feline immunodeficiency virus infection in cats. *Ciência Rural* **38**, 2245-2249
- Larson, L. J. & Schultz, R. D. (2007) Three-year serologic immunity against canine parvovirus type 2 and canine adenovirus type 2 in dogs vaccinated with a canine combination vaccine. *Veterinary Therapeutics* **8**, 305-308
- Larson, L. J., Thiel, B. E., Sharp, P., *et al.* (2013) A comparative study of protective immunity provided by oral, intranasal and parenteral canine *Bordetella bronchiseptica* vaccines. *International Journal of Applied Research in Veterinary Medicine* **11**, 153-160
- Lértora, J. & Burna, A. (2003) Hepatitis infecciosa canina en la ciudad de Corrientes. Reporte de un caso. *Revista Veterinaria* **14**, 1
- Levy, J. K., Crawford, P. C., Lappin, M. R., *et al.* (2008) Infectious diseases of dogs and cats on Isabela Island, Galapagos. *Journal of Veterinary Internal Medicine* **22**, 60-65
- Lickey, A. L., Kennedy, M., Patton, S., *et al.* (2005) Serologic survey of domestic felids in the Petén region of Guatemala. *Journal of Zoo and Wildlife Medicine* **36**, 121-123
- Lopes, E. G., Sevá, A. P., Ferreira, F., *et al.* (2018) Vaccine effectiveness and use of collar impregnated with insecticide for reducing incidence of *Leishmania* infection in dogs in an endemic region for visceral leishmaniasis, in Brazil. *Epidemiology and Infection* **146**, 401-406

- Lopes E.G., Sevá, A.P., Ferreira F. *et al* (2018) Vaccine effectiveness and use of collar impregnated with insecticide for reducing incidence of Leishmania infection in dogs in an endemic region for visceral leishmaniasis, in Brazil. *Epidemiology and Infection* **146**, 401–406
- López-Céspedes, A., Longoni, S. S., Sauri-Arceo, C. H., *et al.* (2012) *Leishmania* spp. epidemiology of canine leishmaniasis in the Yucatan Peninsula. *Scientific World Journal*, 2012, 945871
- Lund, E., Yang, M., Faunt, K., *et al.* (2010) Assessment of risk for diarrhea in young dogs after Giardia vaccine administration. *Journal of Veterinary Internal Medicine* **24**, 750
- Mantovani, E., Marangoni, R. G., Gauditano, G., *et al.* (2012) Amplification of the flgE gene provides evidence for the existence of a Brazilian borreliosis. *Revista do Instituto de Medicina Tropical São Paulo* **54**, 153-158
- Marcondes, M. & Day, M. J. (2019) Current status and management of canine leishmaniasis in Latin America. *Research in Veterinary Science* **123**, 261-272
- Marcondes, M., Hirata, K. Y., Vides, J. P., *et al.* (2018) Infection by *Mycoplasma* spp., feline immunodeficiency virus and feline leukemia virus in cats from an area endemic for visceral leishmaniasis. *Parasites and Vectors* **11**, 131
- Martin, L. E. R., Wiggans, K. T., Wennogle, S. A., *et al.* (2014) Vaccine-associated *Leptospira* antibodies in client-owned dogs. *Journal of Veterinary Internal Medicine* **28**, 789-792
- Maya, L., Calleros, L., Francia, L., *et al.* (2013) Phylodynamics analysis of canine parvovirus in Uruguay: evidence of two successive invasions by different variants. *Archives of Virology* **158**, 1133-1141
- Meinerz, A. R. M., Antunes, T. A., Souza, L. L., *et al.* (2010) Frequency of the virus of the feline leukemia (FeLV) in domestic felines (*Felis catus*) semi-domiciliates in the municipalities of Pelotas and Rio Grande. *Ciência Animal Brasileira* **11**, 90-93
- Mende, K., Stuetzer, B., Truyen, U., *et al.* (2014) Evaluation of an in-house dot enzyme-linked immunosorbent assay to detect antibodies against feline panleukopenia virus. *Journal of Feline Medicine and Surgery* **16**, 805-811
- Miotto, B. A., Moreno, L. Z., Guilloux, A. G. A., *et al.* (2016) Molecular and serological characterization of the first *Leptospira santarosai* strain isolated from a dog. *Acta Tropica* **162**, 1-4
- Miraglia, F., Matsuo, M., Morais, Z. M., *et al.* (2013) Molecular characterization, serotyping, and antibiotic susceptibility profile of *Leptospira interrogans* serovar Copen-hageni isolates from Brazil. *Diagnostic Microbiology and Infectious Disease* **77**, 195-199
- Miret, J., Sosa, L., Galeano, E., *et al.* (2010) Situación epidemiológica de la leishmaniosis canina en el Paraguay (años 2005-2010). *Revista Paraguaya de Epidemiología* **1**, 74-75
- Miret, J., Medina, M., Velázquez, A. L., *et al.* (2011) Canine visceral leishmaniosis in stray dogs of Asunción, Paraguay. *Revista Paraguaya de Epidemiología* **2**, 13-22
- Mitchell, S. A., Zwijnenberg, R. J., Huang, J., *et al.* (2012) Duration of serological response to canine parvovirus-type 2, canine distemper virus, canine adenovirus-type 1 and canine parainfluenza virus in client-owned dogs in Australia. *Australian Veterinary Journal* **90**, 468-473
- Miyaji, K., Suzuki, A., Shimakura, H., *et al.* (2012) Large-scale survey of adverse reactions to canine non-rabies combined vaccines in Japan. *Veterinary Immunology and Immunopathology* **145**, 447-452
- Molina, V. M., Blanco, R. D., Estepa, P., *et al.* (2016) Frequency of feline immunodeficiency virus (FIV) in southern Aburrá Valley, Colombia (2013-2015). *Revista Científica* **26**, 374-378
- Monteiro, F. L., Cargnelutti, J. F., Martins, M., *et al.* (2016) Detection of respiratory viruses in shelter dogs maintained under varying environmental conditions. *Brazilian Journal of Microbiology* **47**, 876-881
- Moon, A. & Veir, J. (2019) Vaccination and associated adverse events in dogs previously treated for primary immune-mediated hemolytic anemia. *Journal of the American Animal Hospital Association* **55**, 29-34
- Moore, G. E., Guptill, L. F., Ward, M. P., *et al.* (2005) Adverse events diagnosed within three days of vaccine administration in dogs. *Journal of the American Veterinary Medical Association* **227**, 1102-1108
- Moore, G. E., DeSantis-Kerr, A. C., Guptill, L. F., *et al.* (2007) Adverse events after vaccine administration in cats: 2,560 cases (2002 - 2005). *Journal of the American Veterinary Medical Association* **231**, 94-100
- Mora, M., Napolitano, C., Ortega, R., *et al.* (2015) Feline immunodeficiency virus and feline leukemia virus infection in free-ranging guignas (*Leopardus guigna*) and sympatric domestic cats in human perturbed landscapes on Chiloé Island, Chile. *Journal of Wildlife Diseases* **51**, 199-208
- Morrison, W. B. (2012) Inflammation and cancer: a comparative view. *Journal of Veterinary Internal Medicine* **26**, 18-31
- Mouzin, D. E., Lorenzen, M. J., Haworth, J. D., *et al.* (2004) Duration of serologic response to five viral antigens in dogs. *Journal of the American Veterinary Medical Association* **224**, 55-60
- Nascimento, D. A., Vieira, R. F., Vieira, T. S., *et al.* (2016) Serosurvey of *Borrelia* in dogs, horses, and humans exposed to ticks in a rural settlement of southern Brazil. *Revista Brasileira de Parasitologia Veterinária* **25**, 418-422
- Novo, S. G., Bucafusco, D., Diaz, L. M., *et al.* (2016) Viral diagnostic criteria for feline immunodeficiency virus and feline leukemia virus infections in domestic cats from Buenos Aires, Argentina. *Revista Argentina de Microbiología* **48**, 293-297
- Oliva, G., Nieto, J., Foglia Manzillo, V., *et al.* (2014) A randomised, double-blind, controlled efficacy trial of the LIESP/QA-21 vaccine in naive dogs exposed to two *Leishmania infantum* transmission seasons. *PLoS Neglected Tropical Diseases* **8**, e3213
- Oliveira, E. C., Almeida, P. R., Sonne, L., *et al.* (2011) Infectious canine hepatitis in naturally infected dogs: pathological findings and immunohistochemical diagnosis. *Pesquisa Veterinária Brasileira* **31**, 158-164
- Ortega, A. F., Martínez-Castaneda, J. F., Bautista-Gómez, L. G., *et al.* (2017) Identification of co-infection by rotavirus and parvovirus in dogs with gastroenteritis in Mexico. *Brazilian Journal of Microbiology* **48**, 769-773
- Ortega-Pacheco, A., Aguilar-Caballero, A. J., Colin-Flores, R. F., *et al.* (2014) Seroprevalence of feline leukemia virus, feline immunodeficiency virus and heartworm infection among owned cats in tropical Mexico. *Journal of Feline Medicine and Surgery* **16**, 460-464
- Paternina-Gómez, M., Díaz-Olmos, Y., Paternina, L. E., *et al.* (2013) High prevalence of infection with *Leishmania* (Kinetoplastea: Trypanosomatidae) in dogs in northern Colombia. *Biomédica* **33**, 375-382
- Pérez, R., Francia, L., Romero, V., *et al.* (2007) First detection of canine parvovirus type 2c in South America. *Veterinary Microbiology* **124**, 147-152

- Pino, N. J. A., Maldonado, O. C. P., Mantilla, L. T. B., *et al.* (2015) Prevalence of FeLV, FIV and feline heartworm in cats from an animal shelter in Maracaibo, Venezuela. *Revista Científica* **24**, 285-292
- Pino-Rodríguez, D., Márquez-Álvarez, M., Rojas-Hoyos, N. A., *et al.* (2018) Seroprevalence of canine parvovirus in dogs of Boyeros municipality, Havana, Cuba. *Revista de Salud Animal* **40**, 1
- Portillo, V. H. S., Benítez, S. R. B. & Acosta, L. E. (2011) Prevalence of canine visceral leishmaniasis in the area of influence of the health unit family Marín ka'aguy, Luque. *Revista de Salud Pública* **1**, 11-18
- Pratelli, A., Tinelli, A., Decaro, N., *et al.* (2003) Efficacy of an inactivated canine coronavirus vaccine in pups. *New Microbiology* **26**, 151-155
- Puentes, R., Eliopulos, N., Pérez, R., *et al.* (2012) Isolation and characterization of canine parvovirus type 2c (CPV-2c) from symptomatic puppies. *Brazilian Journal of Microbiology* **2012**, 1005-1009
- Reese, M. J., Patterson, E. V., Tucker, S. J., *et al.* (2008) Effects of anesthesia and surgery on serologic responses to vaccination in kittens. *Journal of the American Veterinary Medical Association* **233**, 116-121
- Regina-Silva, S., Feres, A. M. L. T., França-Silva, J. C., *et al.* (2016) Field randomized trial to evaluate the efficacy of the Leish-Tec® vaccine against canine visceral leishmaniasis in an endemic area of Brazil. *Vaccine* **34**, 2233-2239
- Roberts, E. S., VanLare, K. A., Roycroft, L. M., *et al.* (2015) Effect of high-dose ciclosporin on the immune response to primary and booster vaccination in immunocompetent cats. *Journal of Feline Medicine and Surgery* **17**, 101-109
- Rodrigues, A. M. A., Vasconcellos, S. A., Moraes, Z. M., *et al.* (2007) Isolation of *Leptospira* spp. from dogs with clinical suspect of leptospirosis in São Paulo (Brazil). *Acta Scientiae Veterinariae* **35**, s705-s706
- Rodríguez-Tovar, L. E., Ramírez-Romero, R., Valdez-Nava, Y., *et al.* (2007) Combined distemper-adenoviral pneumonia in a dog. *Canadian Veterinary Journal* **48**, 632-634
- Rosypal, A.C., Cortés-Vecino, J.A., Gennari, S.M. *et al.* (2007). Serological survey of *Leishmania infantum* and *Trypanosoma cruzi* in dogs from urban areas of Brazil and Colombia. *Veterinary Parasitology* **149**, 172-177
- Rubio, A., Martínez Avila, R., Guzman Iturbe, H., *et al.* (2018) Guías para la vacunación de perros (caninos) y gatos (felinos) en Perú. *Revista de Investigaciones Veterinarias del Perú* **29**, 1463-1474
- Satragno, D., Faral-Tello, P., Canneva, B., *et al.* (2017) Autochthonous outbreak and expansion of canine visceral leishmaniasis, Uruguay. *Emerging Infectious Diseases* **23**, 536-538
- Scherk, M. A., Ford, R. B., Gaskell, R. M., *et al.* (2013) 2013 AAFP Feline Vaccination Advisory Panel report. *Journal of Feline Medicine and Surgery* **15**, 785-808
- Schneider, M. C., Aguilera, X. P., da Silva, J. B. Jr., *et al.* (2011) Elimination of neglected diseases in Latin America and the Caribbean: a mapping of selected diseases. *PLoS Neglected Tropical Diseases* **5**, e964
- Schuller, S., Francey, T., Hartmann, K., *et al.* (2015) European consensus statement on leptospirosis in dogs and cats. *Journal of Small Animal Practice* **56**, 159-179
- Schultz, R. D. (2006) Duration of immunity for canine and feline vaccines: a review. *Veterinary Microbiology* **117**, 75-79
- Scott-Garrard, M. M., Chiang, Y.-W. & David, F. (2018) Comparative onset of immunity of oral and intranasal vaccines against challenge with *Bordetella bronchiseptica*. *Veterinary Record Open* **5**, e000285
- Seki, M. C., Carrasco, A. O. T., Mineo, T. W. P., *et al.* (2010) DNA detection and evaluation of antibodies against *Chlamydomydia felis* in domestic cats from the northeast of the state of São Paulo, Brazil. *Virus Reviews and Research* **15**, 28-42
- Sevá, A. P., Ovallos, F. G., Amaku, M., *et al.* (2016) Canine-based strategies for prevention and control of visceral leishmaniasis in Brazil. *PLoS One* **11**, e0160058
- Silva, E. F., Cerqueira, G. M., Seyffert, N., *et al.* (2009) *Leptospira noguchii* and human and animal leptospirosis, southern Brazil. *Emerging Infectious Diseases* **15**, 621623
- Sobrinho, L. S. V., Vides, J. P., Braga, E. T., *et al.* (2011) Serofrequency of feline immunodeficiency virus and feline leukemia virus in cats of Araçatuba, São Paulo. *Brazilian Journal of Veterinary Research and Animal Science* **48**, 378-383
- Spibey, N., Greenwood, N. M., Sutton, D., *et al.* (2008) Canine parvovirus type 2 vaccine protects against virulent challenge with type 2c virus. *Veterinary Microbiology* **128**, 48-55
- Spolidorio, M. G., Labruna, M. B., Machado, R. Z., *et al.* (2010) Survey for tick-borne zoonoses in the state of Espírito Santo, southeastern Brazil. *American Journal of Tropical Medicine and Hygiene* **83**, 201-206
- Stepita, M. E., Bain, M. J. & Kass, P. H. (2013) Frequency of CPV infection in vaccinated puppies that attended puppy socialization classes. *Journal of the American Animal Hospital Association* **49**, 95-100
- Studer, N., Lutz, H., Saegerman, C., *et al.* (2019) Pan-European study on the prevalence of the feline leukaemia virus infection - reported by the European Advisory Board on Cat Diseases (ABCD Europe). *Viruses* **11**, 993
- Suepaul, S. M., Carrington, C. V. F., Campbell, M., *et al.* (2010) Serovars of *Leptospira* isolated from dogs and rodents. *Epidemiology and Infection* **138**, 1059-1070
- Sykes, J. E., Hartmann, K., Lunn, K. F., *et al.* (2010) ACVIM small animal consensus statement on leptospirosis: diagnosis, epidemiology, treatment, and prevention. *Journal of Veterinary Internal Medicine* **25**, 1-13
- Teixeira, B. M., Rajão, D. S., Haddad, J. P. A., *et al.* (2007) Ocorrência do vírus da imunodeficiência felina e do vírus da leucemia felina em gatos domésticos mantidos em abrigos no município de Belo Horizonte. *Arquivo Brasileiro de Medicina Veterinária e Zootecnia* **59**, 939-942
- Teixeira, B. M., Taniwaki, S. A., Menezes, P. M. M., *et al.* (2019) Feline immunodeficiency virus in Northern Ceará, Brazil. *Journal of Feline Medicine and Surgery Open Reports* **5**, 2055116919859112
- Urban, J. F., Steenhard, N. R., Solano-Aguilar, G. I., *et al.* (2007) Infection with parasitic nematodes confounds vaccination efficacy. *Veterinary Parasitology* **148**, 14-20
- Velasco-Villa, A., Escobar, L. E., Sanchez, A., *et al.* (2017) Successful strategies implemented towards the elimination of canine rabies in the Western Hemisphere. *Antiviral Research* **143**, 1-12
- Vigilato, M. A. N., Cosivi, O., Knobl, T., *et al.* (2013) Rabies update for Latin America and the Caribbean. *Emerging Infectious Diseases* **19**, 678-679
- Wilson, S., Illambas, J., Siedek, E., *et al.* (2014) Vaccination of dogs with canine parvovirus type 2b (CPV-2b) induces neutralising antibody responses to CPV-2a and CPV-2c. *Vaccine* **32**, 5420-5424

- Yasuda, P. H., Santa Rosa, C. A., Myers, D. M., *et al.* (1980) The isolation of leptospire from stray dogs in the city of São Paulo, Brazil. *International Journal of Zoonoses* **7**, 131-134
- Yoshinari, N. H., Abrao, M. G., Bonoldi, V. L., *et al.* (2003) Coexistence of antibodies to tick-borne agents of babesiosis and Lyme borreliosis in patients from Cotia county, State of São Paulo, Brazil. *Memórias do Instituto Oswaldo Cruz* **98**, 311-318
- Zerpa, O., Ulrich, M., Negrón, E., *et al.* (2000) Canine visceral leishmaniasis on Margarita Island (Nueva Esparta, Venezuela). *Transactions of the Royal Society of Tropical Medicine and Hygiene* **94**, 484-487
- Zerpa, O., Pratlong, F., Ulrich, M., *et al.* (2001) Isolation of *Leishmania infantum*, zymodeme MON-1 from canine and human visceral leishmaniasis on Margarita Island, Venezuela. *Memórias do Instituto Oswaldo Cruz* **96**, 901-902
- Zerpa, O., Ulrich, M., Borges, R., *et al.* (2003) Epidemiological aspects of human and canine visceral leishmaniasis in Venezuela. *Revista Panamericana de Salud Pública* **13**, 239-245

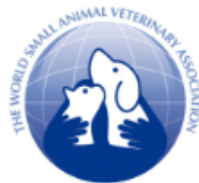

**WSAVA**  
Global Veterinary Community

**Vaccination  
Guidelines  
Group**

**GRUPO DE DIRETRIZES DE VACINAÇÃO DA WSAVA**

**FOCO NO PROJETO PARA A AMÉRICA LATINA DE 2016 a 2019**

Prezado colega,

Com certeza você tem conhecimento do Grupo de Diretrizes de Vacinação (VGG) da WSAVA e do trabalho que temos feito desde 2004 para introduzir as recomendações globais para a vacinação de cães e gatos. Em 2016, o VGG inicia um empolgante novo projeto que enfoca doenças infecciosas endêmicas e vacinação na América Latina. O VGG estará fazendo uma série de visitas para obtenção de informações aos países da região para reunir-se com diferentes profissionais veterinários (clínicos veterinários, veterinários ligados à indústria, docentes e indivíduos ligados a órgãos governamentais) para formular recomendações para a melhor prática de vacinação de cães e gatos nessa parte do mundo.

Antecipadamente a essas visitas, o VGG gostaria de obter e analisar informações sobre as percepções dos médicos veterinários de pequenos animais que trabalham nesses países com relação a doenças infecciosas e vacinação de cães e gatos.

Conseqüentemente, preparamos o breve questionário anexo e apreciaríamos muito se você dedicasse um tempo para respondê-lo para auxiliar em nossos esforços. Os dados permanecerão confidenciais para o VGG e só serão publicados de forma anônima e agregada.

Agradecemos por sua assistência com o nosso trabalho e esperamos encontrá-lo em um dos eventos de educação continuada que o VGG estará organizando na América Latina durante esta fase de nosso trabalho.

Atenciosamente,

Professor Emérito M.J. Day  
BSc BVMS(Hons) PhD DSc Dr(hc) DiplECVP FASM FRCPath FRCVS  
Presidente, Grupo de Diretrizes de Vacinação da WSAVA.

**QUESTIONÁRIO**

**TODAS AS INFORMAÇÕES SÃO CONFIDENCIAIS PARA O VGG**

**SEÇÃO 1. SOBRE VOCÊ**

Você é: Homem\_\_\_ Mulher\_\_\_

Qual é sua faixa etária?

20 a 30 anos\_\_\_ 31 a 40 anos\_\_\_ 41 a 50 anos\_\_\_ 51 a 60 anos\_\_\_ > 60 anos\_\_\_

Há quanto tempo você é veterinário?

<5 anos\_\_\_ 5 a 10 anos\_\_\_ 11 a 20 anos\_\_\_ 21 a 30 anos\_\_\_ > 30 anos\_\_\_

Em que faculdade de veterinária você se formou? \_\_\_\_\_

**SEÇÃO 2. SOBRE A CLÍNICA NA QUAL VOCÊ TRABALHA**

Sua clínica é: rural\_\_\_ urbana (cidade)\_\_\_

Sua clínica é: somente de pequenos animais\_\_\_ diversas espécies animais (incluindo animais de grande porte)\_\_\_

Quantos veterinários trabalham em sua clínica?

Período integral \_\_\_ Meio período \_\_\_

Quantos funcionários de apoio (enfermeiros, recepcionistas, pessoal do canil) trabalham em sua clínica?

Período integral \_\_\_ Meio período \_\_\_

Você usa um sistema informatizado de registros médicos? Sim \_\_\_\_ Não \_\_\_\_

Você atende pacientes somente durante o dia? Sim \_\_\_\_ Não \_\_\_\_

Se a resposta for negativa, você tem um hospital para os pacientes que permanecem durante a noite ou por mais tempo? Sim \_\_\_\_ Não \_\_\_\_

Aproximadamente que proporção (%) de seus pacientes são: Cães \_\_\_\_ gatos \_\_\_\_ outras espécies \_\_\_\_

Você tem acesso a um laboratório de diagnóstico? No local \_\_\_\_ Em uma universidade \_\_\_\_ Particular \_\_\_\_

Se você tem um laboratório próprio na clínica quais testes você realiza?

|                                                          |        |
|----------------------------------------------------------|--------|
| Hematologia                                              |        |
| Bioquímica sérica                                        |        |
| Exame citológico                                         |        |
| Títulos de anticorpos para doenças prevenidas por vacina | Quais: |
| Outros                                                   | Quais: |

### SEÇÃO 3. SOBRE DOENÇAS INFECCIOSAS CANINAS EM SUA CLÍNICA

Assinale quais das seguintes doenças infecciosas você acredita que estejam presentes em sua área. Para cada uma que você indicar, dê uma estimativa de quantos casos você diagnosticaria em 1 ano.

| Doença                                                    | Observada em minha clínica | Número estimado de casos observados/ano |
|-----------------------------------------------------------|----------------------------|-----------------------------------------|
| Cinomose canina (CDV)                                     |                            |                                         |
| Hepatite infecciosa canina (adenovírus, CAV1)             |                            |                                         |
| Parvovirose canina (CPV2)                                 |                            |                                         |
| Raiva                                                     |                            |                                         |
| Leptospirose                                              |                            |                                         |
| Tosse dos canis (complexo respiratório infeccioso canino) |                            |                                         |
| Leishmaniose visceral canina                              |                            |                                         |

### SEÇÃO 4. SOBRE DOENÇAS INFECCIOSAS FELINAS EM SUA CLÍNICA

Assinale quais das seguintes doenças infecciosas você acredita que estejam presentes em sua área. Para cada uma que você indicar, dê uma estimativa de quantos casos você diagnosticaria em 1 ano.

| Doença                                | Presente em minha clínica | Número de casos observados/ano |
|---------------------------------------|---------------------------|--------------------------------|
| Panleucopenia felina (FPV)            |                           |                                |
| Infecção por herpesvírus felino (FHV) |                           |                                |
| Infecção por calicivírus felino (FCV) |                           |                                |
| Raiva                                 |                           |                                |
| Leucemia viral felina (FeLV)          |                           |                                |
| Imunodeficiência viral felina (FIV)   |                           |                                |
| Peritonite infecciosa felina (FIP)    |                           |                                |
| Infecção por <i>Chlamydia felis</i>   |                           |                                |

### SEÇÃO 5. SOBRE AS VACINAS QUE VOCÊ TEM EM SUA CLÍNICA

Assinale quais dos seguintes tipos de vacina você tem em sua clínica:

| Para cães                                                 | Para gatos                                         |
|-----------------------------------------------------------|----------------------------------------------------|
| Vacina combinada de CDV, CAV2 e CPV2                      | Vacina combinada de FPV, FHV e FCV                 |
| Combinada de CDV, CAV2, CPV2, CPI                         | Vacina combinada de FPV, FHV, FCV e clamídia       |
| Combinada de CDV, CAV2, CPV2, CPI, Leptospira             | Vacina combinada de FPV, FHV, FCV, clamídia e FeLV |
| Combinada de CDV, CAV2, CPV2, CPI, CCv                    |                                                    |
| Combinada de CDV, CAV2, CPV2, CPI, CCv, <i>Leptospira</i> |                                                    |
| Combinada de CPV2, CCv                                    |                                                    |
| Combinada de CPV2, CDV                                    |                                                    |
| Vacina contra giardíase                                   |                                                    |
| Vacina antirrábica                                        |                                                    |
| Combinada de Bordetella/Parainfluenza canina              | Vacina antirrábica                                 |
| Intranasal ____ parenteral ____                           |                                                    |
| Vacina contra leptospirose                                | Vacina contra FeLV                                 |
| Vacina contra leishmaniose visceral                       | Vacina contra FIV                                  |
| Outras (especifique)                                      | Outras (especifique)                               |

Todas as suas vacinas caninas são de um único fabricante? Sim \_\_\_\_ Não \_\_\_\_

Qual(is) fabricante(s)? \_\_\_\_\_

Todas as suas vacinas felinas são de um único fabricante? Sim \_\_\_\_ Não \_\_\_\_

Qual(is) fabricante(s)? \_\_\_\_\_

## SEÇÃO 6. SOBRE A VACINAÇÃO DE CÃES EM SUA CLÍNICA

Que proporção (%) de seus pacientes caninos já foram vacinados com as vacinas caninas ESSENCIAIS (CDV, CAV e CPV)?

Com que idade você vacina um filhote pela primeira vez? \_\_\_\_\_

Quantas vezes você vacinaria um filhote e de quanto tempo é o intervalo em semanas entre as vacinações? \_\_\_\_\_

Com que idade você administra a última dose de vacina a um filhote? \_\_\_\_\_

Você revacina em aproximadamente 1 ano após terminar as vacinações do filhote? Sim \_\_\_\_\_ Não \_\_\_\_\_

Com que frequência você administra as vacinas ESSENCIAIS a cães adultos?

A cada 6 meses \_\_\_ Anualmente (todo ano) \_\_\_ Trienalmente (a cada 3 anos) \_\_\_ Menos frequentemente (>3 anos) \_\_\_\_\_

A vacinação antirrábica para cães é uma exigência legal em sua área? Sim \_\_\_\_\_ Não \_\_\_\_\_

Com que idade você administra a primeira dose de vacina antirrábica para um filhote? \_\_\_\_\_

Você administra uma segunda dose de vacina antirrábica para um filhote? Nesse caso, com que idade? \_\_\_\_\_

Você recomenda revacinar cães adultos contra a raiva? Nesse caso, com que frequência eles devem ser revacinados? \_\_\_\_\_

Você usa outras vacinas além das vacinas essenciais (CDV, CAV2 e CPV2) em cães adultos? Nesse caso, quais e com que frequência você as administra (isto é, anualmente? Mais ou menos frequentemente?) \_\_\_\_\_

## SEÇÃO 6. SOBRE A VACINAÇÃO DE GATOS EM SUA CLÍNICA

Aproximadamente que proporção (%) de seus pacientes felinos já foram vacinados com as vacinas felinas ESSENCIAIS (FPV, FHV e FCV)? \_\_\_\_\_

Com que idade você vacina um filhote pela primeira vez? \_\_\_\_\_

Quantas vezes você vacinaria um filhote e de quanto tempo é o intervalo em semanas entre as vacinações? \_\_\_\_\_

Com que idade você administra a última dose de vacina de filhote? \_\_\_\_\_

Você revacina em 1 ano após terminar as vacinações do filhote? Sim \_\_\_\_\_ Não \_\_\_\_\_

Com que frequência você administra as vacinas ESSENCIAIS a gatos adultos?

Semestralmente \_\_\_ Anualmente (todo ano) \_\_\_ Trienalmente (a cada 3 anos) \_\_\_ Mais tempo (>3 anos) \_\_\_\_\_

A vacinação antirrábica para gatos é uma exigência legal em sua área? \_\_\_\_\_

Com que idade você administra a primeira dose de vacina antirrábica para um filhote? \_\_\_\_\_

Você administra uma segunda dose de vacina antirrábica para um filhote? Nesse caso, com que idade? \_\_\_\_\_

Você recomenda revacinar gatos adultos contra a raiva? Nesse caso, com que frequência eles devem ser revacinados? \_\_\_\_\_

Você usa outras vacinas além das vacinas essenciais (FPV/ FCV/ FHV1) em gatos adultos? Nesse caso, quais e com que frequência você as administra (isto é, anualmente? Mais ou menos frequentemente?) \_\_\_\_\_

## HÁ MAIS ALGUMA COISA QUE VOCÊ GOSTARIA DE NOS DIZER A RESPEITO DE DOENÇAS INFECCIOSAS OU PRÁTICAS DE VACINAÇÃO EM SUA ÁREA?

### FINALMENTE

Você tem doenças importantes em sua área para as quais atualmente não existem vacinas disponíveis? Sim \_\_\_\_\_ Não \_\_\_\_\_

Se afirmativo, quais são as doenças: \_\_\_\_\_

Você usaria uma vacina se ela estivesse disponível? Sim \_\_\_\_\_ Não \_\_\_\_\_

**OBRIGADO POR SEU TEMPO PARA RESPONDER A ESTE QUESTIONÁRIO. ELE FORNECERÁ INFORMAÇÕES VALIOSAS PARA O VGG AJUDAR A FORMULAR RECOMENDAÇÕES PARA VACINAÇÃO NA AMÉRICA LATINA**

Estas diretrizes de vacinação da WSAVA foram publicadas conforme submetidas ao JSAP e passaram por um processo resumido de revisão por pares.
